# Supplementary material for: Hydration shell model for expeditious and reliable individual hydrogen bond energies in large water clusters
Source: Royal Society of Chemistry journal article supplement (doi:10.1039/d2cp01663j), 2022-01-01
Supplement: d2cp01663j1.pdf [file d2cp01663j1.pdf]

## Electronic Supplementary Information

### Hydration Shell Model for Expeditious and Reliable Individual Hydrogen Bond Energies in Large Water Clusters

Mini Bharati Ahirwar,<sup>†</sup> Nalini D. Gurav,<sup>‡</sup> Shridhar R. Gadre,<sup>‡</sup> and Milind M. Deshmukh<sup>†\*</sup>

<sup>†</sup>Department of Chemistry, Dr. Harisingh Gour Vishwavidyalaya (A Central University),  
Sagar, 470003, India.

<sup>‡</sup>Department of Scientific Computing, Modelling, and Simulation, Savitribai Phule Pune  
University, Pune – 411007, India.

---

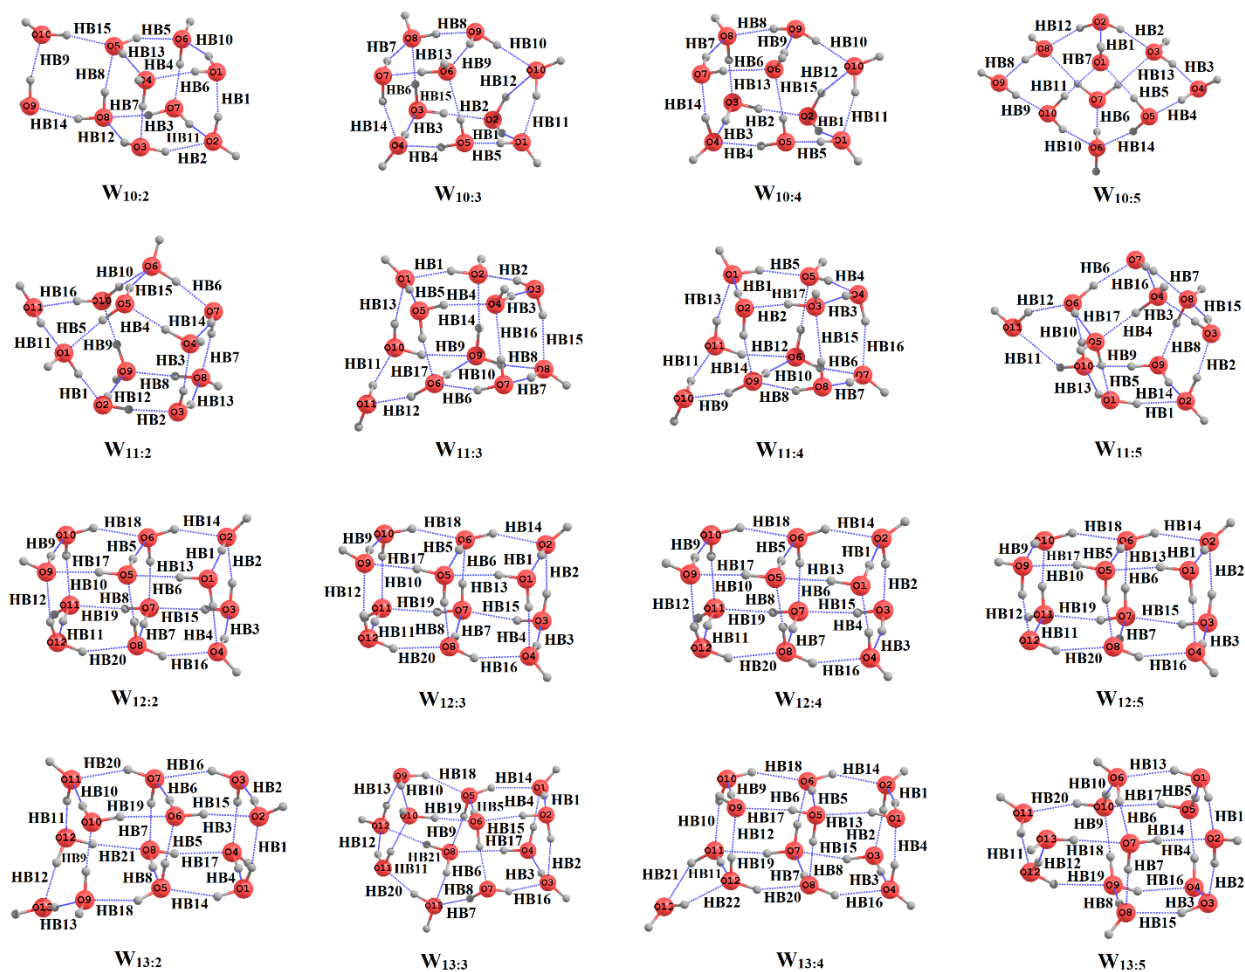

**Fig. S1** The MTA-MP2/aDZ-optimized geometries of higher energy conformers of water clusters ( $W_n$ ,  $n = 10-13$ ).

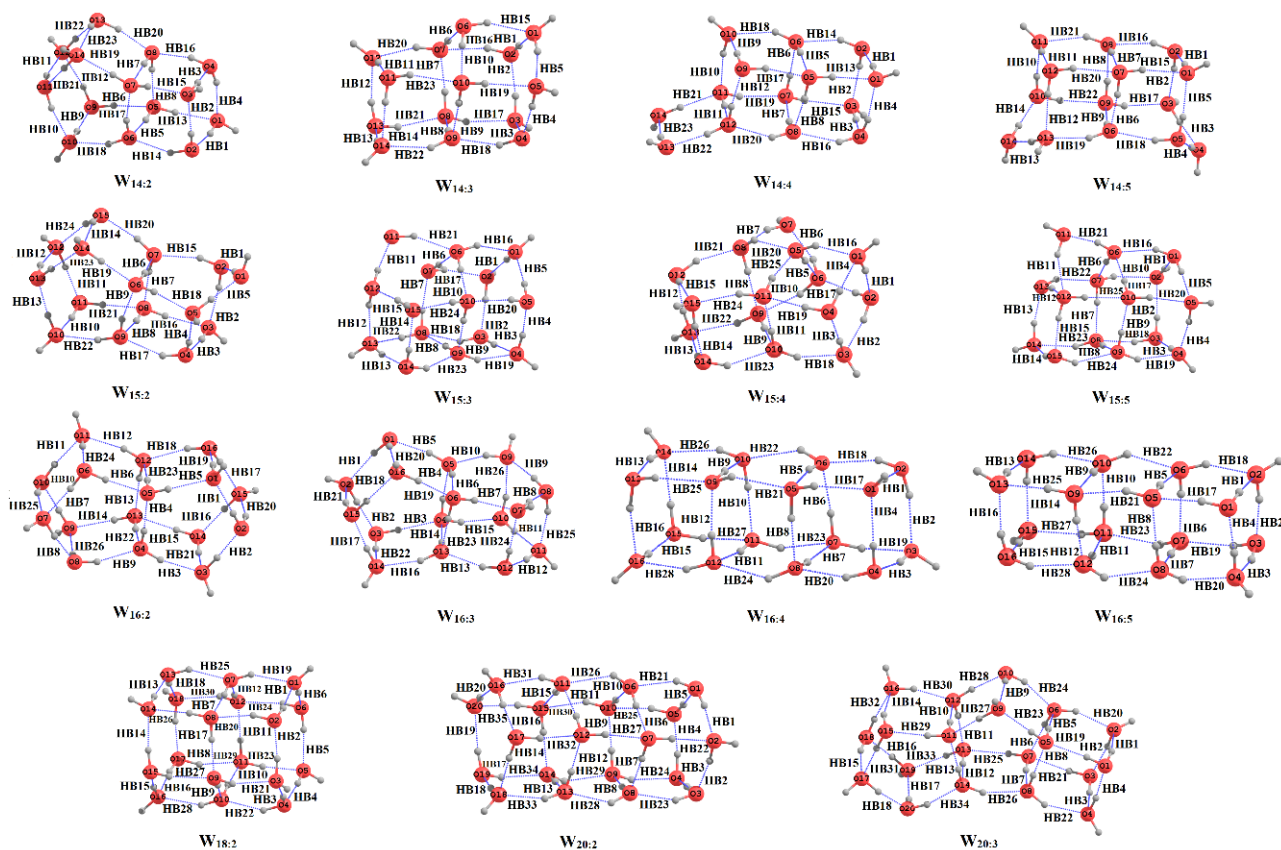

**Fig. S2** The MTA-MP2/aDZ-optimized geometries of higher energy conformers of water clusters ( $W_n$ ,  $n = 14-16, 18$  and  $20$ ).

**Table S1** Single point energies (in a.u.) of various species in the MTA (actual and shell-1) calculation of  $W_{10:1}$  at MP2/aTZ level of theory. See text for details.

| Species                             | Energy       |
|-------------------------------------|--------------|
| $W_{10:1}$ ( $E_{W_{10:1}}$ )       | -763.445748  |
| Fragment F1 ( $E_{F1}$ )            | -687.078369  |
| Fragment F2 ( $E_{F2}$ )            | -687.078231  |
| Fragment F3 ( $E_{F3}$ )            | -610.728746  |
| $W_{10:1}$ ( $E_{\text{shell-1}}$ ) | -458.0223891 |
| Fragment F1' ( $E_{F1'}$ )          | -381.6668051 |
| Fragment F2' ( $E_{F2'}$ )          | -381.6695901 |
| Fragment F3' ( $E_{F3'}$ )          | -305.3247461 |

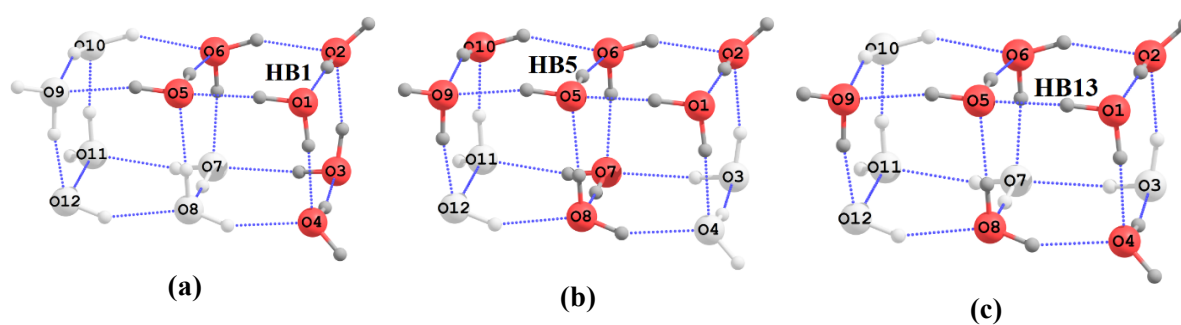

**Fig. S3** Various shell-1 model for estimation of hydrogen bond energy (a) HB1(O2-H...O1) (b) HB5 (O5-H...O6) and (c) HB13 (O1-H...O5) in  $W_{12:1}$  cluster.

## Formulas

### 1. Root mean square deviation (RMSD)

$$\text{RMSD} = \sqrt{\frac{\sum_{i=1}^N (x_i - y_i)^2}{N}}$$

### 2. Mean Absolute Error (MAE)

$$\text{MAE} = \frac{\sum_{i=1}^N |x_i - y_i|}{N}$$

### 3. Maximum Absolute Error ( $|\Delta E_{\max}|$ )

$$|\Delta E_{\max}| = \text{Maximum of } |x_i - y_i|$$

### 4. Standard Deviation ( $S\varepsilon$ )

$$\text{Sum of Squares of Error (SSE)} = \sum_{i=1}^N (x_i - y_i)^2$$

$$S\varepsilon = \sqrt{\frac{\text{SSE}}{N - K - 1}}$$

Where,

$x_i$  = HB energy by Shell-1 model

$y_i$  = HB energy by actual MTA-based method

$N$  = Number of HB energy

**Table S2** Hydrogen bond energies (kcal/mol) in higher energy  $W_{10:n}$ ,  $n=2-5$  clusters calculated using the actual MTA-based method and the shell-1 model at MP2/aTZ level of theory.

| HB label                     | $E_{HB}^{Actual}$ | $E_{HB}^{shell-1}$ | $E_{HB}^{dimer}$ | $E_{coop.}$ | HB label          | $E_{HB}^{Actual}$ | $E_{HB}^{shell-1}$ | $E_{HB}^{dimer}$ | $E_{coop.}$ |
|------------------------------|-------------------|--------------------|------------------|-------------|-------------------|-------------------|--------------------|------------------|-------------|
| <b><math>W_{10:2}</math></b> |                   |                    |                  |             |                   |                   |                    |                  |             |
| HB1 <sup>#</sup>             | 10.01             | 10.86              | 4.77             | 6.09        | HB9               | 7.95              | 7.18               | 5.07             | 2.11        |
| HB2                          | 7.02              | 7.34               | 4.93             | 2.41        | HB10              | 7.02              | 7.32               | 4.90             | 2.42        |
| HB3                          | 11.06             | 11.58              | 4.50             | 7.08        | HB11              | 7.00              | 7.31               | 4.91             | 2.40        |
| HB4                          | 7.04              | 7.34               | 4.91             | 2.43        | HB12              | 7.83              | 7.96               | 4.72             | 3.24        |
| HB5                          | 7.93              | 8.08               | 4.82             | 3.26        | HB13              | 7.93              | 8.02               | 4.83             | 3.19        |
| HB6                          | 11.00             | 11.59              | 4.53             | 7.06        | HB14              | 5.21              | 5.14               | 3.10             | 2.04        |
| HB7                          | 7.87              | 8.04               | 4.74             | 3.30        | HB15              | 7.01              | 7.06               | 4.37             | 2.69        |
| HB8                          | 8.67              | 9.47               | 5.05             | 4.42        |                   |                   |                    |                  |             |
| <b><math>W_{10:3}</math></b> |                   |                    |                  |             |                   |                   |                    |                  |             |
| HB1 <sup>#</sup>             | 7.33              | 7.48               | 4.77             | 2.71        | HB9               | 7.27              | 7.05               | 5.13             | 1.92        |
| HB2 <sup>#</sup>             | 6.68              | 6.58               | 4.18             | 2.40        | HB10              | 5.47              | 5.08               | 4.38             | 0.70        |
| HB3 <sup>#</sup>             | 11.28             | 10.42              | 4.30             | 6.12        | HB11              | 7.05              | 6.31               | 4.33             | 1.98        |
| HB4 <sup>#</sup>             | 7.70              | 6.81               | 4.91             | 1.90        | HB12              | -0.06             | 0.16               | 1.25             | -1.09       |
| HB5 <sup>#</sup>             | 11.54             | 11.08              | 4.16             | 6.92        | HB13              | 4.33              | 4.47               | 4.20             | 0.27        |
| HB6                          | 10.53             | 9.96               | 4.52             | 5.44        | HB14              | 3.26              | 3.69               | 3.41             | 0.28        |
| HB7                          | 7.36              | 6.75               | 4.92             | 1.83        | HB15              | 3.76              | 3.84               | 3.56             | 0.28        |
| HB8                          | 10.48             | 10.41              | 4.59             | 5.82        |                   |                   |                    |                  |             |
| <b><math>W_{10:4}</math></b> |                   |                    |                  |             |                   |                   |                    |                  |             |
| HB1                          | 7.22              | 6.54               | 4.69             | 1.85        | HB9 <sup>#</sup>  | 10.79             | 10.35              | 4.47             | 5.88        |
| HB2                          | 6.61              | 6.21               | 4.21             | 2.00        | HB10              | 6.81              | 6.04               | 5.18             | 0.86        |
| HB3                          | 7.04              | 7.02               | 5.12             | 1.90        | HB11              | 7.05              | 6.41               | 4.33             | 2.08        |
| HB4                          | 4.04              | 3.96               | 3.61             | 0.35        | HB12              | 0.11              | 0.49               | 1.39             | -0.90       |
| HB5 <sup>#</sup>             | 11.48             | 11.18              | 4.19             | 6.99        | HB13              | 11.08             | 10.73              | 4.37             | 6.36        |
| HB6                          | 3.19              | 3.74               | 3.44             | 0.30        | HB14              | 10.30             | 9.92               | 4.59             | 5.33        |
| HB7                          | 7.47              | 6.81               | 4.92             | 1.89        | HB15 <sup>#</sup> | 7.43              | 6.70               | 4.89             | 1.81        |
| HB8                          | 4.90              | 4.84               | 4.24             | 0.60        |                   |                   |                    |                  |             |
| <b><math>W_{10:5}</math></b> |                   |                    |                  |             |                   |                   |                    |                  |             |
| HB1                          | 10.63             | 10.24              | 4.61             | 5.63        | HB8               | 9.91              | 9.03               | 4.21             | 4.82        |
| HB2                          | 7.08              | 6.64               | 4.86             | 1.78        | HB9               | 9.92              | 9.16               | 4.33             | 4.83        |
| HB3                          | 9.91              | 9.03               | 4.21             | 4.82        | HB10              | 6.72              | 6.35               | 4.67             | 1.68        |
| HB4                          | 9.92              | 9.16               | 4.33             | 4.83        | HB11              | 6.83              | 6.50               | 4.87             | 1.63        |
| HB5                          | 6.83              | 6.50               | 4.87             | 1.63        | HB12              | 7.08              | 6.64               | 4.86             | 1.78        |
| HB6                          | 10.53             | 10.21              | 4.64             | 5.57        | HB13              | 7.05              | 6.65               | 4.94             | 1.71        |
| HB7                          | 7.05              | 6.65               | 4.94             | 1.71        | HB14              | 6.72              | 6.35               | 4.67             | 1.68        |

<sup>#</sup>The shell-1 model for these HBs contains seven water molecules.

**Table S3** Hydrogen bond energies (kcal/mol) in higher energy  $W_{11:n}$ ,  $n=2-5$  clusters calculated using the actual MTA-based method and the shell-1 model at MP2/aTZ level.

| HB label                     | $E_{HB}^{Actual}$ | $E_{HB}^{shell-1}$ | $E_{HB}^{dimer}$ | $E_{coop.}$ | HB label         | $E_{HB}^{Actual}$ | $E_{HB}^{shell-1}$ | $E_{HB}^{dimer}$ | $E_{coop.}$ |
|------------------------------|-------------------|--------------------|------------------|-------------|------------------|-------------------|--------------------|------------------|-------------|
| <b><math>W_{11:2}</math></b> |                   |                    |                  |             |                  |                   |                    |                  |             |
| HB1 <sup>#</sup>             | 11.81             | 11.60              | 3.92             | 7.68        | HB9 <sup>#</sup> | 11.74             | 11.43              | 3.93             | 7.50        |
| HB2                          | 6.58              | 6.50               | 3.55             | 2.95        | HB10             | 7.36              | 6.62               | 5.02             | 1.60        |
| HB3                          | 6.85              | 6.80               | 5.03             | 1.77        | HB11             | 7.52              | 6.86               | 4.78             | 2.08        |
| HB4                          | 10.60             | 11.02              | 4.61             | 6.41        | HB12             | 7.31              | 6.46               | 4.96             | 1.50        |
| HB5                          | 7.08              | 6.42               | 4.92             | 1.50        | HB13             | 6.27              | 6.05               | 4.95             | 1.10        |
| HB6                          | 10.63             | 11.07              | 4.49             | 6.58        | HB14             | 7.50              | 7.55               | 4.96             | 2.59        |
| HB7                          | 6.99              | 6.79               | 5.04             | 1.75        | HB15             | 7.22              | 7.37               | 5.15             | 2.22        |
| HB8                          | 8.06              | 7.61               | 4.37             | 3.24        | HB16             | 6.40              | 5.75               | 4.28             | 1.47        |
| <b><math>W_{11:3}</math></b> |                   |                    |                  |             |                  |                   |                    |                  |             |
| HB1                          | 8.48              | 7.97               | 4.24             | 3.73        | HB10             | 8.32              | 8.60               | 5.06             | 3.54        |
| HB2                          | 6.57              | 6.51               | 4.92             | 1.59        | HB11             | 8.16              | 7.63               | 4.89             | 2.74        |
| HB3                          | 10.05             | 10.66              | 4.71             | 5.95        | HB12             | 5.28              | 5.12               | 3.08             | 2.04        |
| HB4                          | 6.87              | 6.50               | 4.74             | 1.76        | HB13             | 6.28              | 5.70               | 4.81             | 0.89        |
| HB5 <sup>#</sup>             | 11.95             | 11.58              | 3.97             | 7.61        | HB14             | 7.18              | 6.94               | 5.05             | 1.89        |
| HB6                          | 7.59              | 7.64               | 4.51             | 3.13        | HB15             | 7.35              | 7.45               | 5.03             | 2.42        |
| HB7                          | 10.77             | 11.42              | 4.53             | 6.89        | HB16             | 7.01              | 7.33               | 4.95             | 2.38        |
| HB8                          | 7.47              | 7.81               | 4.66             | 3.15        | HB17             | 8.17              | 7.53               | 4.54             | 2.99        |
| HB9                          | 2.87              | 3.23               | 2.60             | 0.63        |                  |                   |                    |                  |             |
| <b><math>W_{11:4}</math></b> |                   |                    |                  |             |                  |                   |                    |                  |             |
| HB1 <sup>#</sup>             | 6.16              | 6.35               | 4.77             | 1.58        | HB10             | 8.31              | 8.24               | 5.06             | 3.18        |
| HB2 <sup>#</sup>             | 11.01             | 10.36              | 4.34             | 6.02        | HB11             | 8.19              | 7.37               | 4.87             | 2.50        |
| HB3 <sup>#</sup>             | 7.78              | 6.78               | 4.88             | 1.90        | HB12             | 3.06              | 2.79               | 2.68             | 0.11        |
| HB4 <sup>#</sup>             | 11.60             | 10.55              | 4.04             | 6.51        | HB13             | 4.44              | 4.06               | 4.11             | -0.05       |
| HB5 <sup>#</sup>             | 7.47              | 7.11               | 4.33             | 2.78        | HB14             | 4.72              | 4.69               | 3.59             | 1.10        |
| HB6                          | 7.50              | 6.90               | 4.68             | 2.22        | HB15             | 3.11              | 3.69               | 3.54             | 0.15        |
| HB7                          | 10.70             | 9.76               | 4.48             | 5.28        | HB16             | 3.14              | 3.50               | 3.46             | 0.04        |
| HB8                          | 7.70              | 6.78               | 4.52             | 2.26        | HB17             | 3.29              | 3.50               | 3.68             | -0.18       |
| HB9                          | 5.26              | 4.96               | 3.06             | 1.90        |                  |                   |                    |                  |             |
| <b><math>W_{11:5}</math></b> |                   |                    |                  |             |                  |                   |                    |                  |             |
| HB1                          | 7.47              | 7.03               | 4.93             | 2.10        | HB10             | 10.08             | 9.95               | 4.60             | 5.35        |
| HB2                          | 10.49             | 11.01              | 4.61             | 6.40        | HB11             | 1.03              | 0.95               | 0.79             | 0.16        |
| HB3                          | 6.82              | 6.74               | 5.04             | 1.70        | HB12             | 5.20              | 4.93               | 4.14             | 0.79        |
| HB4                          | 8.05              | 7.83               | 4.42             | 3.41        | HB13             | 7.88              | 7.81               | 4.72             | 3.09        |
| HB5                          | 11.77             | 11.36              | 4.22             | 7.14        | HB14             | 7.17              | 7.47               | 4.97             | 2.50        |
| HB6                          | 7.24              | 7.21               | 3.32             | 3.89        | HB15             | 7.55              | 7.56               | 4.96             | 2.60        |
| HB7                          | 7.16              | 6.85               | 5.00             | 1.85        | HB16             | 6.34              | 6.14               | 4.95             | 1.19        |
| HB8                          | 10.87             | 11.10              | 4.50             | 6.60        | HB17             | 7.52              | 7.52               | 4.86             | 2.66        |
| HB9                          | 7.68              | 7.17               | 4.69             | 2.48        |                  |                   |                    |                  |             |

<sup>#</sup>The shell-1 model for these HBs contains seven water molecules.

**Table S4** Hydrogen bond energies (kcal/mol) in higher energy  $W_{12;n}$ ,  $n=2-5$  clusters calculated using the shell-1 model at MP2/aTZ level.

| HB label   | $E_{HB}^{shell-1}$ | $E_{HB}^{dimer}$ | $E_{coop.}$ | HB label | $E_{HB}^{shell-1}$ | $E_{HB}^{dimer}$ | $E_{coop.}$ |
|------------|--------------------|------------------|-------------|----------|--------------------|------------------|-------------|
| $W_{12:2}$ |                    |                  |             |          |                    |                  |             |
| HB1        | 11.11              | 4.77             | 6.34        | HB11     | 9.68               | 4.73             | 4.94        |
| HB2        | 7.43               | 5.01             | 2.42        | HB12     | 6.67               | 5.02             | 1.66        |
| HB3        | 11.11              | 4.77             | 6.34        | HB13     | 7.28               | 4.46             | 2.82        |
| HB4        | 7.43               | 5.01             | 2.42        | HB14     | 7.32               | 4.51             | 2.81        |
| HB5        | 9.15               | 4.79             | 4.36        | HB15     | 7.28               | 4.46             | 2.82        |
| HB6        | 8.68               | 4.77             | 3.91        | HB16     | 7.32               | 4.51             | 2.81        |
| HB7        | 9.15               | 4.79             | 4.36        | HB17     | 3.68               | 2.95             | 0.73        |
| HB8        | 8.68               | 4.77             | 3.91        | HB18     | 3.83               | 2.90             | 0.93        |
| HB9        | 9.68               | 4.73             | 4.94        | HB19     | 3.68               | 2.95             | 0.73        |
| HB10       | 6.67               | 5.02             | 1.66        | HB20     | 3.83               | 2.90             | 0.93        |
| $W_{12:3}$ |                    |                  |             |          |                    |                  |             |
| HB1        | 9.67               | 4.73             | 4.94        | HB11     | 11.11              | 4.76             | 6.35        |
| HB2        | 6.68               | 5.02             | 1.66        | HB12     | 7.45               | 5.02             | 2.43        |
| HB3        | 9.67               | 4.73             | 4.94        | HB13     | 3.82               | 2.89             | 0.93        |
| HB4        | 6.68               | 5.02             | 1.66        | HB14     | 3.70               | 2.95             | 0.74        |
| HB5        | 9.17               | 4.79             | 4.37        | HB15     | 3.82               | 2.89             | 0.93        |
| HB6        | 8.69               | 4.76             | 3.93        | HB16     | 3.70               | 2.95             | 0.74        |
| HB7        | 9.17               | 4.79             | 4.37        | HB17     | 7.32               | 4.51             | 2.81        |
| HB8        | 8.69               | 4.76             | 3.93        | HB18     | 7.27               | 4.45             | 2.82        |
| HB9        | 11.11              | 4.76             | 6.35        | HB19     | 7.32               | 4.51             | 2.81        |
| HB10       | 7.45               | 5.02             | 2.43        | HB20     | 7.27               | 4.45             | 2.82        |
| $W_{12:4}$ |                    |                  |             |          |                    |                  |             |
| HB1        | 6.67               | 5.02             | 1.66        | HB11     | 9.66               | 4.74             | 4.92        |
| HB2        | 9.66               | 4.74             | 4.92        | HB12     | 6.67               | 5.02             | 1.66        |
| HB3        | 6.67               | 5.02             | 1.66        | HB13     | 3.82               | 2.89             | 0.92        |
| HB4        | 9.66               | 4.74             | 4.92        | HB14     | 3.77               | 2.93             | 0.84        |
| HB5        | 7.90               | 4.79             | 3.11        | HB15     | 3.82               | 2.89             | 0.92        |
| HB6        | 7.90               | 4.79             | 3.11        | HB16     | 3.77               | 2.93             | 0.84        |
| HB7        | 7.90               | 4.79             | 3.11        | HB17     | 3.77               | 2.93             | 0.83        |
| HB8        | 7.90               | 4.79             | 3.11        | HB18     | 3.82               | 2.89             | 0.92        |
| HB9        | 9.65               | 4.74             | 4.92        | HB19     | 3.77               | 2.93             | 0.83        |
| HB10       | 6.67               | 5.02             | 1.66        | HB20     | 3.82               | 2.89             | 0.92        |
| $W_{12:5}$ |                    |                  |             |          |                    |                  |             |
| HB1        | 9.66               | 4.73             | 4.92        | HB11     | 6.68               | 5.02             | 1.66        |
| HB2        | 6.68               | 5.02             | 1.66        | HB12     | 9.66               | 4.73             | 4.92        |
| HB3        | 9.66               | 4.73             | 4.92        | HB13     | 3.82               | 2.89             | 0.92        |
| HB4        | 6.68               | 5.02             | 1.66        | HB14     | 3.76               | 2.93             | 0.83        |
| HB5        | 7.90               | 4.79             | 3.11        | HB15     | 3.82               | 2.89             | 0.92        |
| HB6        | 7.90               | 4.79             | 3.11        | HB16     | 3.76               | 2.93             | 0.83        |
| HB7        | 7.90               | 4.79             | 3.11        | HB17     | 3.76               | 2.93             | 0.83        |
| HB8        | 7.90               | 4.79             | 3.11        | HB18     | 3.82               | 2.89             | 0.92        |
| HB9        | 6.68               | 5.02             | 1.66        | HB19     | 3.76               | 2.93             | 0.83        |
| HB10       | 9.66               | 4.73             | 4.92        | HB20     | 3.82               | 2.89             | 0.92        |



**Table S5** Hydrogen bond energies (kcal/mol) in higher energy  $W_{13:n}$ ,  $n=2-5$  clusters calculated using the shell-1 model at MP2/aTZ level.

| HB label                     | $E_{HB}^{shell-1}$ | $E_{HB}^{dimer}$ | $E_{coop.}$ | HB label | $E_{HB}^{shell-1}$ | $E_{HB}^{dimer}$ | $E_{coop.}$ |
|------------------------------|--------------------|------------------|-------------|----------|--------------------|------------------|-------------|
| <b><math>W_{13:2}</math></b> |                    |                  |             |          |                    |                  |             |
| HB1                          | 6.72               | 5.03             | 1.69        | HB12     | 6.38               | 4.76             | 1.62        |
| HB2                          | 9.49               | 4.81             | 4.67        | HB13     | 6.30               | 4.54             | 1.76        |
| HB3                          | 6.77               | 5.05             | 1.72        | HB14     | 3.66               | 3.10             | 0.56        |
| HB4                          | 9.57               | 4.77             | 4.81        | HB15     | 3.66               | 3.03             | 0.63        |
| HB5                          | 8.12               | 4.84             | 3.27        | HB16     | 3.44               | 2.88             | 0.57        |
| HB6                          | 7.78               | 4.67             | 3.11        | HB17     | 3.72               | 3.18             | 0.55        |
| HB7                          | 7.85               | 4.69             | 3.16        | HB18     | 3.72               | 3.31             | 0.40        |
| HB8                          | 8.13               | 4.83             | 3.30        | HB19     | 3.31               | 2.90             | 0.41        |
| HB9                          | 9.13               | 4.52             | 4.61        | HB20     | 3.16               | 2.86             | 0.30        |
| HB10                         | 6.30               | 5.03             | 1.26        | HB21     | 4.30               | 3.68             | 0.62        |
| HB11                         | 9.22               | 4.49             | 4.73        |          |                    |                  |             |
| <b><math>W_{13:3}</math></b> |                    |                  |             |          |                    |                  |             |
| HB1                          | 11.26              | 4.47             | 6.78        | HB12     | 3.26               | 3.26             | 0.00        |
| HB2                          | 6.55               | 4.79             | 1.76        | HB13     | 9.55               | 4.57             | 4.97        |
| HB3                          | 10.01              | 4.83             | 5.18        | HB14     | 7.67               | 4.81             | 2.86        |
| HB4                          | 7.80               | 4.95             | 2.85        | HB15     | 4.94               | 2.69             | 2.26        |
| HB5                          | 6.27               | 3.79             | 2.48        | HB16     | 4.98               | 4.26             | 0.72        |
| HB6                          | 6.42               | 3.70             | 2.72        | HB17     | 5.60               | 4.19             | 1.41        |
| HB7                          | 5.57               | 4.81             | 0.76        | HB18     | 6.82               | 4.62             | 2.20        |
| HB8                          | 5.06               | 3.87             | 1.19        | HB19     | 8.30               | 4.38             | 3.92        |
| HB9                          | 9.10               | 4.72             | 4.38        | HB20     | 9.51               | 4.25             | 5.27        |
| HB10                         | 4.00               | 3.63             | 0.37        | HB21     | 6.79               | 4.71             | 2.08        |
| HB11                         | 6.14               | 5.02             | 1.11        |          |                    |                  |             |
| <b><math>W_{13:4}</math></b> |                    |                  |             |          |                    |                  |             |
| HB1                          | 7.53               | 5.03             | 2.50        | HB12     | 8.22               | 4.98             | 3.24        |
| HB2                          | 10.94              | 4.82             | 6.12        | HB13     | 7.05               | 4.49             | 2.56        |
| HB3                          | 7.54               | 5.02             | 2.52        | HB14     | 7.05               | 4.57             | 2.48        |
| HB4                          | 10.91              | 4.83             | 6.09        | HB15     | 7.06               | 4.52             | 2.53        |
| HB5                          | 9.88               | 4.78             | 5.10        | HB16     | 7.03               | 4.57             | 2.46        |
| HB6                          | 10.02              | 4.77             | 5.24        | HB17     | 7.01               | 4.53             | 2.48        |
| HB7                          | 9.99               | 4.73             | 5.26        | HB18     | 7.01               | 4.47             | 2.54        |
| HB8                          | 9.94               | 4.76             | 5.18        | HB19     | 7.14               | 4.36             | 2.78        |
| HB9                          | 11.02              | 4.75             | 6.27        | HB20     | 7.59               | 4.48             | 3.12        |
| HB10                         | 7.78               | 4.81             | 2.98        | HB21     | 0.93               | 0.73             | 0.20        |
| HB11                         | 9.96               | 4.98             | 4.98        | HB22     | 4.98               | 4.18             | 0.80        |
| <b><math>W_{13:5}</math></b> |                    |                  |             |          |                    |                  |             |
| HB1                          | 5.98               | 5.01             | 0.97        | HB11     | 8.00               | 4.92             | 0.97        |
| HB2                          | 9.17               | 4.61             | 4.56        | HB12     | 5.46               | 4.62             | 4.56        |
| HB3                          | 5.93               | 4.96             | 0.98        | HB13     | 2.71               | 3.42             | 0.98        |
| HB4                          | 9.06               | 4.48             | 4.59        | HB14     | 3.56               | 3.25             | 4.59        |
| HB5                          | 5.80               | 3.75             | 2.06        | HB15     | 3.40               | 3.43             | 2.06        |
| HB6                          | 8.30               | 4.88             | 3.42        | HB16     | 3.17               | 3.09             | 3.42        |
| HB7                          | 6.81               | 4.76             | 2.05        | HB17     | 2.58               | 3.07             | 2.05        |
| HB8                          | 9.14               | 4.12             | 5.01        | HB18     | 5.51               | 3.94             | 5.01        |
| HB9                          | 8.20               | 4.60             | 3.60        | HB19     | 5.39               | 3.74             | 3.60        |
| HB10                         | 5.31               | 4.52             | 0.79        | HB20     | 6.50               | 4.24             | 0.79        |

**Table S6** Hydrogen bond energies (kcal/mol) in higher energy  $W_{14:n}$ ,  $n=2-5$  clusters calculated using the shell-1 model at MP2/aTZ level.

| HB label   | $E_{HB}^{shell-1}$ | $E_{HB}^{dimer}$ | $E_{coop.}$ | HB label | $E_{HB}^{shell-1}$ | $E_{HB}^{dimer}$ | $E_{coop.}$ |
|------------|--------------------|------------------|-------------|----------|--------------------|------------------|-------------|
| $W_{14:2}$ |                    |                  |             |          |                    |                  |             |
| HB1        | 9.24               | 4.97             | 4.28        | HB13     | 3.43               | 3.07             | 0.35        |
| HB2        | 6.79               | 4.98             | 1.81        | HB14     | 3.78               | 3.10             | 0.68        |
| HB3        | 11.84              | 4.20             | 7.63        | HB15     | 7.04               | 4.34             | 2.70        |
| HB4        | 6.67               | 4.88             | 1.79        | HB16     | 5.85               | 3.23             | 2.62        |
| HB5        | 8.12               | 4.83             | 3.30        | HB17     | 6.83               | 4.72             | 2.11        |
| HB6        | 6.24               | 4.30             | 1.94        | HB18     | 6.97               | 4.83             | 2.14        |
| HB7        | 8.08               | 4.95             | 3.13        | HB19     | 6.39               | 4.33             | 2.06        |
| HB8        | 5.26               | 3.22             | 2.04        | HB20     | 5.06               | 2.97             | 2.09        |
| HB9        | 9.88               | 4.70             | 5.18        | HB21     | 10.65              | 4.41             | 6.24        |
| HB10       | 4.26               | 3.60             | 0.65        | HB22     | 10.47              | 4.37             | 6.10        |
| HB11       | 7.01               | 4.91             | 2.10        | HB23     | 6.63               | 4.76             | 1.87        |
| HB12       | 5.09               | 4.29             | 0.79        |          |                    |                  |             |
| $W_{14:3}$ |                    |                  |             |          |                    |                  |             |
| HB1        | 6.12               | 5.17             | 0.95        | HB13     | 9.61               | 4.73             | 4.88        |
| HB2        | 8.72               | 4.71             | 4.01        | HB14     | 7.04               | 5.12             | 1.92        |
| HB3        | 6.10               | 5.06             | 1.05        | HB15     | 2.71               | 3.46             | -0.74       |
| HB4        | 9.01               | 4.45             | 4.56        | HB16     | 2.52               | 2.46             | 0.06        |
| HB5        | 6.79               | 4.34             | 2.45        | HB17     | 3.01               | 2.93             | 0.08        |
| HB6        | 7.44               | 4.11             | 3.32        | HB18     | 3.34               | 2.92             | 0.42        |
| HB7        | 7.34               | 4.54             | 2.80        | HB19     | 1.93               | 2.70             | -0.76       |
| HB8        | 7.25               | 4.66             | 2.59        | HB20     | 4.02               | 3.50             | 0.52        |
| HB9        | 7.26               | 4.80             | 2.47        | HB21     | 3.70               | 3.12             | 0.58        |
| HB10       | 4.33               | 3.70             | 0.63        | HB22     | 3.39               | 2.96             | 0.42        |
| HB11       | 9.66               | 4.87             | 4.79        | HB23     | 3.34               | 2.99             | 0.34        |
| HB12       | 6.56               | 4.89             | 1.68        |          |                    |                  |             |
| $W_{14:4}$ |                    |                  |             |          |                    |                  |             |
| HB1        | 10.97              | 4.81             | 6.16        | HB13     | 7.13               | 4.60             | 2.53        |
| HB2        | 7.54               | 5.03             | 2.52        | HB14     | 7.12               | 4.52             | 2.60        |
| HB3        | 10.86              | 4.84             | 6.02        | HB15     | 6.95               | 4.56             | 2.39        |
| HB4        | 7.55               | 5.03             | 2.52        | HB16     | 6.98               | 4.46             | 2.52        |
| HB5        | 10.03              | 4.71             | 5.32        | HB17     | 6.87               | 4.50             | 2.37        |
| HB6        | 9.91               | 4.75             | 5.16        | HB18     | 6.91               | 4.55             | 2.35        |
| HB7        | 9.82               | 4.83             | 4.98        | HB19     | 7.33               | 4.24             | 3.09        |
| HB8        | 9.84               | 4.71             | 5.13        | HB20     | 7.47               | 4.39             | 3.08        |
| HB9        | 7.21               | 5.05             | 2.15        | HB21     | 7.73               | 4.56             | 3.18        |
| HB10       | 10.13              | 5.10             | 5.03        | HB22     | 7.39               | 4.43             | 2.96        |
| HB11       | 10.25              | 4.55             | 5.70        | HB23     | 8.35               | 5.17             | 3.18        |
| HB12       | 9.44               | 4.95             | 4.49        |          |                    |                  |             |
| $W_{14:5}$ |                    |                  |             |          |                    |                  |             |
| HB1        | 10.38              | 4.81             | 5.57        | HB12     | 6.14               | 5.05             | 1.09        |
| HB2        | 6.92               | 5.05             | 1.87        | HB13     | 8.55               | 4.28             | 4.27        |
| HB3        | 8.95               | 4.32             | 4.64        | HB14     | 8.60               | 4.40             | 4.19        |
| HB4        | 8.96               | 4.40             | 4.56        | HB15     | 6.95               | 4.45             | 2.50        |
| HB5        | 6.71               | 4.91             | 1.80        | HB16     | 7.04               | 4.46             | 2.58        |
| HB6        | 8.78               | 4.78             | 4.01        | HB17     | 6.89               | 4.69             | 2.19        |
| HB7        | 9.09               | 4.71             | 4.38        | HB18     | 6.66               | 4.68             | 1.97        |
| HB8        | 8.81               | 4.77             | 4.05        | HB19     | 4.68               | 3.94             | 0.73        |
| HB9        | 8.89               | 4.91             | 3.98        | HB20     | 3.39               | 2.88             | 0.51        |
| HB10       | 5.93               | 4.93             | 1.01        | HB21     | 3.44               | 3.07             | 0.37        |
| HB11       | 8.92               | 4.79             | 4.14        | HB22     | 3.95               | 3.29             | 0.66        |

**Table S7** Hydrogen bond energies (kcal/mol) in higher energy  $W_{15;n}$ ,  $n=2-5$  clusters calculated using the shell-1 model at MP2/aTZ level..

| HB label   | $E_{HB}^{shell-1}$ | $E_{HB}^{dimer}$ | $E_{coop.}$ | HB label | $E_{HB}^{shell-1}$ | $E_{HB}^{dimer}$ | $E_{coop.}$ |
|------------|--------------------|------------------|-------------|----------|--------------------|------------------|-------------|
| $W_{15:2}$ |                    |                  |             |          |                    |                  |             |
| HB1        | 8.62               | 4.42             | 4.20        | HB13     | 10.54              | 4.61             | 5.93        |
| HB2        | 5.93               | 4.88             | 1.06        | HB14     | 6.79               | 4.96             | 1.82        |
| HB3        | 9.01               | 4.76             | 4.25        | HB15     | 4.01               | 3.41             | 0.60        |
| HB4        | 6.12               | 5.02             | 1.10        | HB16     | 3.58               | 3.07             | 0.51        |
| HB5        | 8.55               | 4.32             | 4.23        | HB17     | 3.86               | 3.17             | 0.69        |
| HB6        | 9.51               | 4.56             | 4.95        | HB18     | 4.68               | 3.98             | 0.71        |
| HB7        | 7.86               | 4.87             | 3.00        | HB19     | 8.65               | 4.54             | 4.10        |
| HB8        | 7.98               | 4.86             | 3.12        | HB20     | 7.75               | 4.06             | 3.69        |
| HB9        | 8.08               | 5.01             | 3.07        | HB21     | 4.18               | 3.19             | 0.99        |
| HB10       | 7.05               | 5.08             | 1.97        | HB22     | 4.90               | 3.84             | 1.06        |
| HB11       | 10.42              | 4.64             | 5.78        | HB23     | 6.42               | 5.02             | 1.40        |
| HB12       | 7.54               | 5.00             | 2.55        | HB24     | 6.44               | 5.02             | 1.42        |
| $W_{15:3}$ |                    |                  |             |          |                    |                  |             |
| HB1        | 7.85               | 4.53             | 3.32        | HB13     | 11.15              | 4.72             | 6.44        |
| HB2        | 10.61              | 4.53             | 6.08        | HB14     | 7.47               | 4.92             | 2.55        |
| HB3        | 7.23               | 5.00             | 2.23        | HB15     | 10.59              | 4.52             | 6.07        |
| HB4        | 10.65              | 4.25             | 6.40        | HB16     | 6.08               | 4.55             | 1.53        |
| HB5        | 7.13               | 5.11             | 2.01        | HB17     | 6.05               | 4.50             | 1.56        |
| HB6        | 5.95               | 3.74             | 2.21        | HB18     | 7.13               | 4.88             | 2.25        |
| HB7        | 9.50               | 4.69             | 4.81        | HB19     | 7.48               | 4.26             | 3.23        |
| HB8        | 9.76               | 4.60             | 5.17        | HB20     | 7.22               | 4.46             | 2.76        |
| HB9        | 9.50               | 4.64             | 4.85        | HB21     | 6.55               | 4.36             | 2.19        |
| HB10       | 9.28               | 4.56             | 4.73        | HB22     | 7.44               | 4.90             | 2.54        |
| HB11       | 5.83               | 4.30             | 1.53        | HB23     | 7.56               | 4.64             | 2.92        |
| HB12       | 7.18               | 5.15             | 2.03        | HB24     | 6.81               | 4.56             | 2.25        |
| $W_{15:4}$ |                    |                  |             |          |                    |                  |             |
| HB1        | 10.12              | 4.65             | 5.46        | HB14     | 11.04              | 4.81             | 6.23        |
| HB2        | 6.98               | 5.12             | 1.86        | HB15     | 7.13               | 5.01             | 2.12        |
| HB3        | 9.63               | 4.80             | 4.83        | HB16     | 3.81               | 2.94             | 0.87        |
| HB4        | 6.68               | 4.99             | 1.69        | HB17     | 5.31               | 3.83             | 1.49        |
| HB5        | 7.73               | 4.97             | 2.76        | HB18     | 3.86               | 3.30             | 0.56        |
| HB6        | 6.26               | 3.58             | 2.69        | HB19     | 3.98               | 3.32             | 0.66        |
| HB7        | 7.44               | 4.95             | 2.49        | HB20     | 4.39               | 2.70             | 1.68        |
| HB8        | 7.82               | 4.40             | 3.42        | HB21     | 5.88               | 4.03             | 1.85        |
| HB9        | 8.60               | 4.65             | 3.94        | HB22     | 7.61               | 4.70             | 2.92        |
| HB10       | 6.18               | 3.61             | 2.57        | HB23     | 6.58               | 4.61             | 1.97        |
| HB11       | 8.32               | 4.50             | 3.83        | HB24     | 6.80               | 5.15             | 1.65        |
| HB12       | 11.28              | 4.65             | 6.64        | HB25     | 7.70               | 5.01             | 2.69        |
| HB13       | 7.61               | 5.03             | 2.58        |          |                    |                  |             |
| $W_{15:5}$ |                    |                  |             |          |                    |                  |             |
| HB1        | 10.64              | 4.68             | 5.96        | HB14     | 7.31               | 5.02             | 2.28        |
| HB2        | 7.17               | 5.03             | 2.14        | HB15     | 8.11               | 3.72             | 4.39        |
| HB3        | 10.80              | 4.50             | 6.30        | HB16     | 7.38               | 4.66             | 2.72        |
| HB4        | 7.82               | 4.49             | 3.33        | HB17     | 7.31               | 4.62             | 2.69        |
| HB5        | 6.98               | 5.12             | 1.87        | HB18     | 7.48               | 4.60             | 2.88        |
| HB6        | 9.27               | 4.86             | 4.41        | HB19     | 6.63               | 4.49             | 2.14        |
| HB7        | 9.50               | 4.81             | 4.68        | HB20     | 5.95               | 4.32             | 1.63        |
| HB8        | 9.65               | 4.67             | 4.98        | HB21     | 6.27               | 4.33             | 1.93        |
| HB9        | 7.38               | 3.70             | 3.68        | HB22     | 6.10               | 3.99             | 2.12        |
| HB10       | 9.53               | 4.60             | 4.93        | HB23     | 7.08               | 4.57             | 2.51        |
| HB11       | 6.32               | 4.03             | 2.29        | HB24     | 6.00               | 4.37             | 1.63        |
| HB12       | 7.13               | 4.55             | 2.58        | HB25     | 6.04               | 4.04             | 2.00        |
| HB13       | 10.62              | 4.84             | 5.78        |          |                    |                  |             |

**Table S8** Hydrogen bond energies (kcal/mol) in higher energy  $W_{16:n}$ ,  $n=2-5$  clusters calculated using the shell-1 model at MP2/aTZ level.

| HB label                     | $E_{HB}^{shell-1}$ | $E_{HB}^{dimer}$ | $E_{coop.}$ | HB label | $E_{HB}^{shell-1}$ | $E_{HB}^{dimer}$ | $E_{coop.}$ |
|------------------------------|--------------------|------------------|-------------|----------|--------------------|------------------|-------------|
| <b><math>W_{16:2}</math></b> |                    |                  |             |          |                    |                  |             |
| HB1                          | 4.15               | 3.57             | 0.58        | HB14     | 6.65               | 4.73             | 1.92        |
| HB2                          | 10.22              | 4.57             | 5.65        | HB15     | 4.06               | 3.35             | 0.71        |
| HB3                          | 4.67               | 3.99             | 0.68        | HB16     | 10.21              | 4.60             | 5.61        |
| HB4                          | 7.24               | 4.22             | 3.02        | HB17     | 4.75               | 4.21             | 0.54        |
| HB5                          | 3.56               | 3.30             | 0.26        | HB18     | 4.54               | 4.00             | 0.53        |
| HB6                          | 7.01               | 4.94             | 2.07        | HB19     | 8.62               | 4.78             | 3.84        |
| HB7                          | 5.10               | 4.27             | 0.84        | HB20     | 7.01               | 4.99             | 2.02        |
| HB8                          | 10.60              | 4.61             | 5.99        | HB21     | 7.06               | 5.03             | 2.03        |
| HB9                          | 6.73               | 4.78             | 1.95        | HB22     | 8.94               | 4.80             | 4.14        |
| HB10                         | 10.47              | 4.61             | 5.85        | HB23     | 9.31               | 4.87             | 4.43        |
| HB11                         | 4.23               | 3.59             | 0.63        | HB24     | 9.82               | 4.79             | 5.03        |
| HB12                         | 7.08               | 4.99             | 2.09        | HB25     | 6.99               | 4.98             | 2.02        |
| HB13                         | 7.43               | 4.25             | 3.18        | HB26     | 7.66               | 5.02             | 2.64        |
| <b><math>W_{16:3}</math></b> |                    |                  |             |          |                    |                  |             |
| HB1                          | 6.58               | 5.04             | 1.54        | HB14     | 9.89               | 4.31             | 5.58        |
| HB2                          | 10.83              | 4.66             | 6.16        | HB15     | 6.63               | 3.47             | 3.16        |
| HB3                          | 7.08               | 4.74             | 2.34        | HB16     | 7.20               | 4.78             | 2.43        |
| HB4                          | 8.95               | 4.75             | 4.20        | HB17     | 10.91              | 4.62             | 6.29        |
| HB5                          | 6.46               | 3.53             | 2.94        | HB18     | 6.63               | 5.03             | 1.59        |
| HB6                          | 9.01               | 4.76             | 4.25        | HB19     | 8.08               | 4.50             | 3.58        |
| HB7                          | 7.07               | 4.82             | 2.25        | HB20     | 5.83               | 4.92             | 0.92        |
| HB8                          | 10.86              | 4.65             | 6.21        | HB21     | 7.54               | 4.98             | 2.56        |
| HB9                          | 6.58               | 5.03             | 1.55        | HB22     | 7.60               | 5.03             | 2.58        |
| HB10                         | 7.84               | 4.47             | 3.37        | HB23     | 10.00              | 4.59             | 5.41        |
| HB11                         | 6.64               | 5.04             | 1.60        | HB24     | 7.61               | 5.02             | 2.60        |
| HB12                         | 10.89              | 4.63             | 6.26        | HB25     | 7.55               | 4.98             | 2.58        |
| HB13                         | 7.31               | 4.80             | 2.51        | HB26     | 5.81               | 4.90             | 0.91        |
| <b><math>W_{16:4}</math></b> |                    |                  |             |          |                    |                  |             |
| HB1                          | 11.02              | 4.79             | 6.23        | HB15     | 11.02              | 4.79             | 6.23        |
| HB2                          | 7.49               | 5.01             | 2.48        | HB16     | 7.49               | 5.01             | 2.48        |
| HB3                          | 11.02              | 4.79             | 6.23        | HB17     | 7.17               | 4.69             | 2.48        |
| HB4                          | 7.49               | 5.01             | 2.48        | HB18     | 7.17               | 4.62             | 2.56        |
| HB5                          | 10.24              | 4.80             | 5.45        | HB19     | 7.17               | 4.69             | 2.48        |
| HB6                          | 9.48               | 4.89             | 4.60        | HB20     | 7.17               | 4.62             | 2.56        |
| HB7                          | 10.24              | 4.80             | 5.45        | HB21     | 6.69               | 4.13             | 2.56        |
| HB8                          | 9.48               | 4.89             | 4.60        | HB22     | 6.69               | 4.13             | 2.56        |
| HB9                          | 10.24              | 4.80             | 5.45        | HB23     | 6.69               | 4.13             | 2.56        |
| HB10                         | 9.48               | 4.89             | 4.60        | HB24     | 6.69               | 4.58             | 2.11        |
| HB11                         | 10.24              | 4.80             | 5.45        | HB25     | 7.17               | 4.62             | 2.56        |
| HB12                         | 9.48               | 4.89             | 4.60        | HB26     | 7.17               | 4.69             | 2.48        |
| HB13                         | 11.02              | 4.79             | 6.23        | HB27     | 7.17               | 4.62             | 2.56        |
| HB14                         | 7.49               | 5.01             | 2.48        | HB28     | 7.17               | 4.69             | 2.48        |
| <b><math>W_{16:5}</math></b> |                    |                  |             |          |                    |                  |             |
| HB1                          | 6.72               | 5.02             | 1.71        | HB15     | 11.03              | 4.79             | 6.24        |
| HB2                          | 9.63               | 4.77             | 4.86        | HB16     | 7.49               | 5.01             | 2.48        |
| HB3                          | 6.72               | 5.02             | 1.71        | HB17     | 3.66               | 3.12             | 0.54        |
| HB4                          | 9.63               | 4.77             | 4.86        | HB18     | 3.64               | 3.20             | 0.44        |
| HB5                          | 8.99               | 4.78             | 4.21        | HB19     | 3.66               | 3.12             | 0.54        |
| HB6                          | 8.68               | 4.91             | 3.77        | HB20     | 3.64               | 3.20             | 0.44        |
| HB7                          | 8.99               | 4.78             | 4.21        | HB21     | 6.62               | 4.11             | 2.51        |
| HB8                          | 8.68               | 4.91             | 3.77        | HB22     | 6.60               | 4.12             | 2.48        |
| HB9                          | 10.25              | 4.79             | 5.46        | HB23     | 6.62               | 4.11             | 2.51        |
| HB10                         | 9.47               | 4.89             | 4.57        | HB24     | 6.60               | 4.12             | 2.48        |
| HB11                         | 10.25              | 4.79             | 5.46        | HB25     | 7.17               | 4.69             | 2.48        |
| HB12                         | 9.47               | 4.89             | 4.57        | HB26     | 7.18               | 4.62             | 2.56        |
| HB13                         | 11.03              | 4.79             | 6.24        | HB27     | 7.17               | 4.69             | 2.48        |
| HB14                         | 7.49               | 5.01             | 2.48        | HB28     | 7.18               | 4.62             | 2.56        |

**Table S9** Hydrogen bond energies (kcal/mol) in higher energy  $W_{18:n}$ ,  $n=2$  clusters calculated using the shell-1 model at MP2/aTZ level.

| HB label   | $E_{HB}^{shell-1}$ | $E_{HB}^{dimer}$ | $E_{coop.}$ | HB label | $E_{HB}^{shell-1}$ | $E_{HB}^{dimer}$ | $E_{coop.}$ |
|------------|--------------------|------------------|-------------|----------|--------------------|------------------|-------------|
| $W_{18:2}$ |                    |                  |             |          |                    |                  |             |
| HB1        | 7.01               | 4.99             | 2.02        | HB16     | 7.01               | 4.99             | 2.02        |
| HB2        | 10.53              | 4.61             | 5.92        | HB17     | 10.53              | 4.61             | 5.92        |
| HB3        | 7.01               | 4.99             | 2.02        | HB18     | 7.01               | 4.99             | 2.02        |
| HB4        | 10.53              | 4.61             | 5.92        | HB19     | 7.48               | 4.65             | 2.83        |
| HB5        | 7.01               | 4.99             | 2.02        | HB20     | 7.34               | 4.51             | 2.83        |
| HB6        | 10.53              | 4.61             | 5.92        | HB21     | 7.48               | 4.65             | 2.83        |
| HB7        | 9.63               | 4.54             | 5.09        | HB22     | 7.34               | 4.51             | 2.83        |
| HB8        | 9.63               | 4.54             | 5.09        | HB23     | 7.48               | 4.65             | 2.83        |
| HB9        | 9.63               | 4.54             | 5.09        | HB24     | 7.34               | 4.51             | 2.83        |
| HB10       | 9.63               | 4.54             | 5.09        | HB25     | 7.34               | 4.51             | 2.83        |
| HB11       | 9.63               | 4.54             | 5.09        | HB26     | 7.48               | 4.65             | 2.83        |
| HB12       | 9.63               | 4.54             | 5.09        | HB27     | 7.34               | 4.51             | 2.83        |
| HB13       | 10.53              | 4.61             | 5.92        | HB28     | 7.48               | 4.65             | 2.83        |
| HB14       | 7.01               | 4.99             | 2.02        | HB29     | 7.34               | 4.51             | 2.83        |
| HB15       | 10.53              | 4.61             | 5.92        | HB30     | 7.48               | 4.65             | 2.83        |

**Table S10** Hydrogen bond energies (kcal/mol) in higher energy  $W_{20:n}$ ,  $n=2-3$  clusters calculated using the shell-1 model at MP2/aTZ level.

| HB label   | $E_{HB}^{shell-1}$ | $E_{HB}^{dimer}$ | $E_{coop.}$ | HB label | $E_{HB}^{shell-1}$ | $E_{HB}^{dimer}$ | $E_{coop.}$ |
|------------|--------------------|------------------|-------------|----------|--------------------|------------------|-------------|
| $W_{20:2}$ |                    |                  |             |          |                    |                  |             |
| HB1        | 6.04               | 5.10             | 0.94        | HB19     | 6.97               | 5.10             | 1.86        |
| HB2        | 9.11               | 4.65             | 4.46        | HB20     | 7.85               | 4.48             | 3.37        |
| HB3        | 6.11               | 5.04             | 1.07        | HB21     | 2.49               | 3.03             | -0.53       |
| HB4        | 9.16               | 4.47             | 4.69        | HB22     | 3.40               | 3.19             | 0.21        |
| HB5        | 5.69               | 3.82             | 1.88        | HB23     | 3.22               | 3.05             | 0.18        |
| HB6        | 8.66               | 4.64             | 4.02        | HB24     | 3.23               | 3.12             | 0.11        |
| HB7        | 8.27               | 4.83             | 3.45        | HB25     | 2.48               | 3.06             | -0.58       |
| HB8        | 8.48               | 4.70             | 3.78        | HB26     | 5.78               | 3.92             | 1.87        |
| HB9        | 8.13               | 4.89             | 3.24        | HB27     | 6.96               | 4.18             | 2.78        |
| HB10       | 6.64               | 4.06             | 2.58        | HB28     | 6.97               | 4.16             | 2.81        |
| HB11       | 9.98               | 4.66             | 5.32        | HB29     | 6.92               | 4.16             | 2.75        |
| HB12       | 9.32               | 4.83             | 4.50        | HB30     | 6.24               | 4.04             | 2.21        |
| HB13       | 10.04              | 4.72             | 5.32        | HB31     | 6.83               | 4.68             | 2.15        |
| HB14       | 9.11               | 4.86             | 4.25        | HB32     | 7.46               | 4.64             | 2.83        |
| HB15       | 7.13               | 3.70             | 3.43        | HB33     | 7.43               | 4.74             | 2.70        |
| HB16       | 10.90              | 4.47             | 6.43        | HB34     | 7.44               | 4.64             | 2.80        |
| HB17       | 7.17               | 5.02             | 2.16        | HB35     | 6.17               | 4.66             | 1.51        |
| HB18       | 10.77              | 4.67             | 6.10        |          |                    |                  |             |
| $W_{20:3}$ |                    |                  |             |          |                    |                  |             |
| HB1        | 6.62               | 4.99             | 1.63        | HB18     | 10.86              | 4.64             | 6.22        |
| HB2        | 9.68               | 4.73             | 4.95        | HB19     | 4.10               | 3.14             | 0.95        |
| HB3        | 6.74               | 5.01             | 1.72        | HB20     | 4.02               | 3.22             | 0.80        |
| HB4        | 9.64               | 4.73             | 4.91        | HB21     | 3.70               | 3.16             | 0.54        |
| HB5        | 8.91               | 4.83             | 4.08        | HB22     | 3.72               | 3.19             | 0.53        |
| HB6        | 8.19               | 4.81             | 3.37        | HB23     | 6.62               | 4.69             | 1.93        |
| HB7        | 8.21               | 4.94             | 3.27        | HB24     | 6.60               | 4.67             | 1.92        |
| HB8        | 8.36               | 4.79             | 3.57        | HB25     | 3.97               | 2.88             | 1.09        |
| HB9        | 6.69               | 4.95             | 1.74        | HB26     | 4.72               | 3.45             | 1.28        |
| HB10       | 9.17               | 4.59             | 4.58        | HB27     | 8.23               | 4.59             | 3.65        |
| HB11       | 8.95               | 4.82             | 4.13        | HB28     | 7.62               | 4.40             | 3.22        |
| HB12       | 8.74               | 5.00             | 3.74        | HB29     | 6.30               | 3.46             | 2.83        |
| HB13       | 8.95               | 4.83             | 4.11        | HB30     | 7.81               | 4.57             | 3.24        |
| HB14       | 5.80               | 4.89             | 0.92        | HB31     | 6.59               | 5.04             | 1.55        |
| HB15       | 7.53               | 4.97             | 2.56        | HB32     | 6.60               | 5.04             | 1.56        |
| HB16       | 10.86              | 4.62             | 6.24        | HB33     | 6.91               | 4.69             | 2.22        |
| HB17       | 7.57               | 5.03             | 2.53        | HB34     | 7.05               | 4.80             | 2.25        |

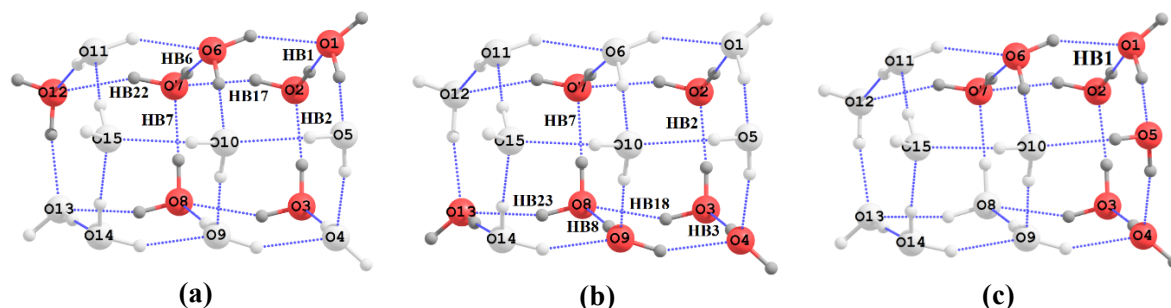

**Fig. S4** Various shell-1 model for estimation of hydrogen bond energy (a) HB17(O2-H...O7) and (b) HB18 (O3-H...O8) and (c) HB1 (O2-H...O1) in  $W_{15:1}$  cluster.

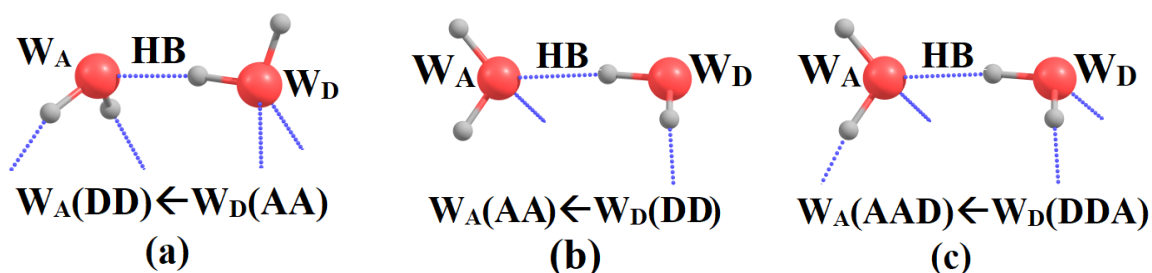

**Fig. S5** Structural features corresponding to (a) the strong (b) weak HBs in small clusters and (c) the weak HBs in larger water clusters.

**Table S11** Correlation parameters for the comparison of HB bond energies by the actual MTA-based method and the shell-1 or shell-2 models.

| Cluster                               | RMSD  | MAE   | $ \Delta E_{\max} $ | $R^2$ | $S\varepsilon$ |
|---------------------------------------|-------|-------|---------------------|-------|----------------|
| $W_{10:1}$                            | 0.261 | 0.205 | 0.49                | 0.98  | 0.280          |
| $W_{11:1}$                            | 0.364 | 0.278 | 0.75                | 0.98  | 0.388          |
| $W_{12:1}$                            | 0.615 | 0.554 | 0.88                | 0.99  | 0.648          |
| $W_{13:1}$                            | 0.384 | 0.325 | 0.99                | 0.97  | 0.404          |
| $W_{14:1}$                            | 0.405 | 0.365 | 0.73                | 0.94  | 0.425          |
| $W_{15:1}$                            | 0.496 | 0.396 | 1.03                | 0.98  | 0.517          |
| $W_{16:1}$                            | 0.451 | 0.333 | 1.07                | 0.94  | 0.470          |
| $W_{10:1} - W_{11:1}$                 | 0.320 | 0.243 | 0.75                | 0.98  | 0.331          |
| $W_{12:1} - W_{16:1}$                 | 0.482 | 0.407 | 1.07                | 0.95  | 0.487          |
| $(\text{NH}_3)_{8:n}$                 | 0.216 | 0.200 | 0.37                | 0.96  | 0.226          |
| $(\text{HF})_n(\text{H}_2\text{O})_m$ | 0.835 | 0.736 | 1.75                | 0.99  | 1.007          |
| $(\text{HF})_4(\text{H}_2\text{O})_8$ |       |       |                     |       |                |
| (shell-1)                             | 0.863 | 0.678 | 1.31                | 0.99  | 0.910          |
| (shell-2)                             | 0.118 | 0.094 | 0.19                | 0.99  | 0.124          |

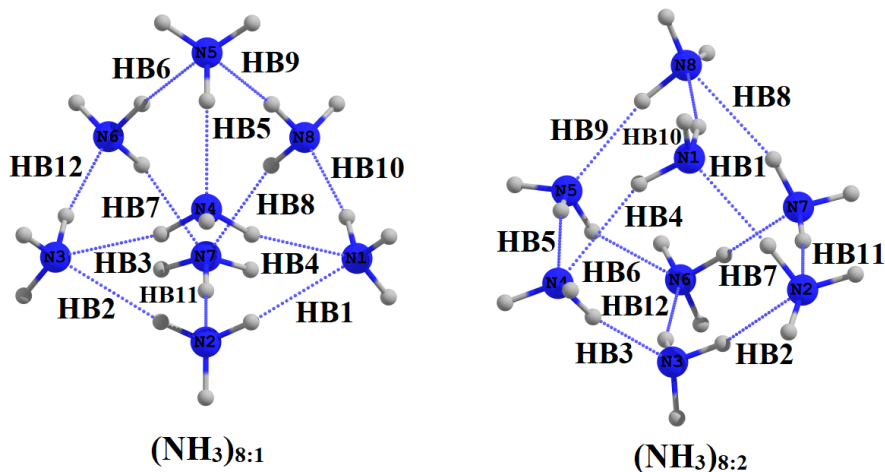

**Fig. S6** The MP2/aDZ-optimized geometries of the two lowest energy conformers of ammonia octamer clusters.

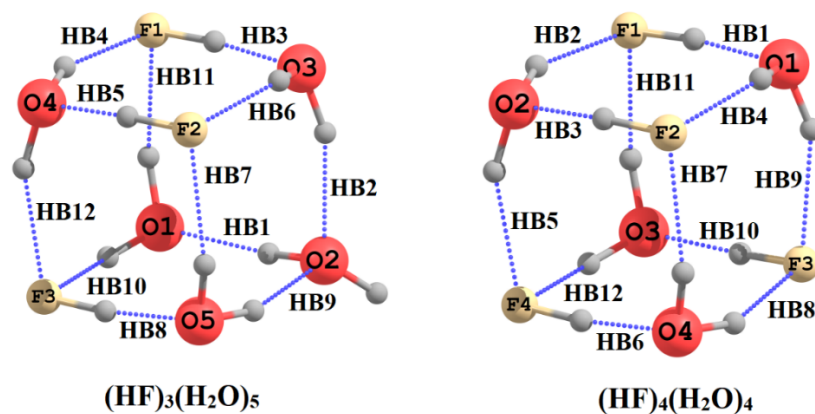

**Fig. S7** The MP2/aDZ-optimized geometries of the two lowest energy conformers of HF-H<sub>2</sub>O octamer clusters.

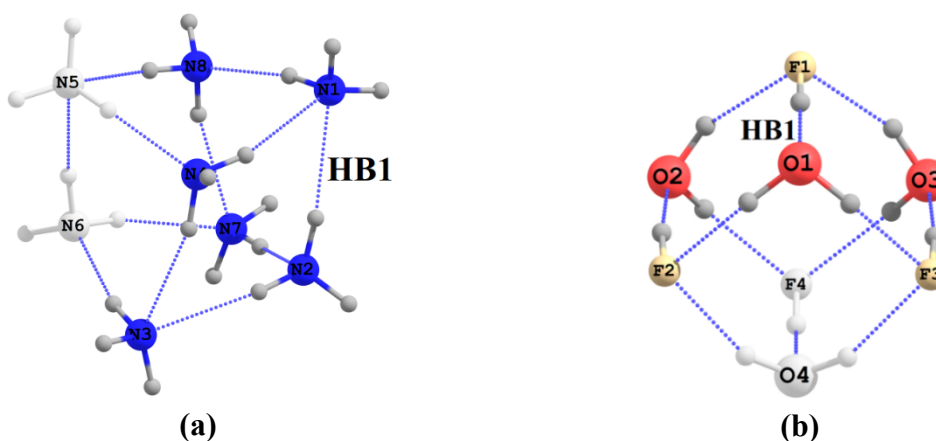

**Fig. S8** Various shell-1 model for estimation of energy of hydrogen bond HB1 in (a)  $(\text{NH}_3)_{8:1}$  and (b)  $(\text{HF})_4(\text{H}_2\text{O})_4$  clusters. See Figs. S6-S7 and text for details



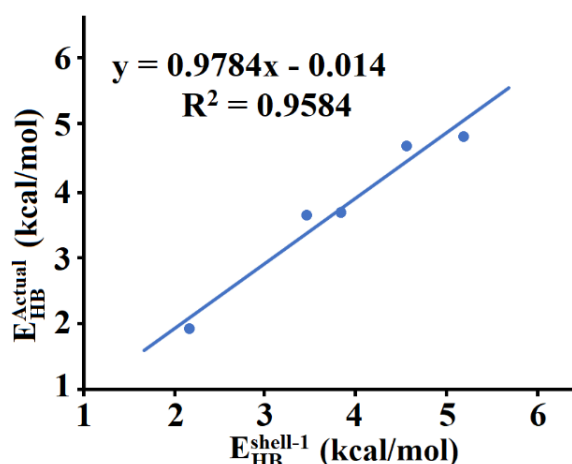

**Fig. S9** Correlation plot between the HB energy, in  $(NH_3)_{8:1}$  and  $(NH_3)_{8:2}$  clusters, estimated by the actual MTA-based method and the shell-1 model.

**Table S12** Hydrogen bond energies (kcal/mol) in  $(NH_3)_{8:1}$  and  $(NH_3)_{8:2}$  clusters calculated using the actual and shell-1 model at MP2/aTZ level.

| HB label       | Distance (Å) | $E_{HB}^{Actual}$ | $E_{HB}^{shell-1}$ | $\Delta E_{HB}$ | $E_{HB}^{dimer}$ | $E_{coop.}$ |
|----------------|--------------|-------------------|--------------------|-----------------|------------------|-------------|
| $(NH_3)_{8:1}$ |              |                   |                    |                 |                  |             |
| HB1            | 2.30         | 3.68              | 3.83               | -0.15           | 3.04             | 0.79        |
| HB2            | 2.30         | 3.68              | 3.83               | -0.15           | 3.04             | 0.79        |
| HB3            | 2.30         | 3.68              | 3.83               | -0.15           | 3.04             | 0.79        |
| HB4            | 2.30         | 3.68              | 3.83               | -0.15           | 3.04             | 0.79        |
| HB5            | 2.10         | 4.82              | 5.19               | -0.37           | 3.07             | 2.12        |
| HB6            | 2.30         | 3.68              | 3.83               | -0.15           | 3.04             | 0.79        |
| HB7            | 2.30         | 3.68              | 3.83               | -0.15           | 3.04             | 0.79        |
| HB8            | 2.30         | 3.68              | 3.83               | -0.15           | 3.04             | 0.79        |
| HB9            | 2.30         | 3.68              | 3.83               | -0.15           | 3.04             | 0.79        |
| HB10           | 2.10         | 4.82              | 5.19               | -0.37           | 3.07             | 2.12        |
| HB11           | 2.10         | 4.82              | 5.19               | -0.37           | 3.07             | 2.12        |
| HB12           | 2.10         | 4.82              | 5.19               | -0.37           | 3.07             | 2.12        |
| $(NH_3)_{8:2}$ |              |                   |                    |                 |                  |             |
| HB1            | 2.11         | 4.68              | 4.56               | 0.12            | 3.03             | 1.53        |
| HB2            | 2.30         | 3.64              | 3.45               | 0.19            | 3.11             | 0.34        |
| HB3            | 2.11         | 4.68              | 4.56               | 0.12            | 3.03             | 1.53        |
| HB4            | 2.30         | 3.64              | 3.45               | 0.19            | 3.11             | 0.34        |
| HB5            | 2.30         | 1.93              | 2.15               | -0.22           | 2.11             | 0.04        |
| HB6            | 2.30         | 3.64              | 3.45               | 0.19            | 3.11             | 0.34        |
| HB7            | 2.11         | 4.68              | 4.56               | 0.12            | 3.03             | 1.53        |
| HB8            | 2.30         | 3.64              | 3.45               | 0.19            | 3.11             | 0.34        |
| HB9            | 2.11         | 4.68              | 4.56               | 0.12            | 3.03             | 1.53        |
| HB10           | 2.30         | 1.93              | 2.15               | -0.22           | 2.11             | 0.04        |
| HB11           | 2.30         | 1.93              | 2.15               | -0.22           | 2.11             | 0.04        |
| HB12           | 2.30         | 1.93              | 2.15               | -0.22           | 2.11             | 0.04        |

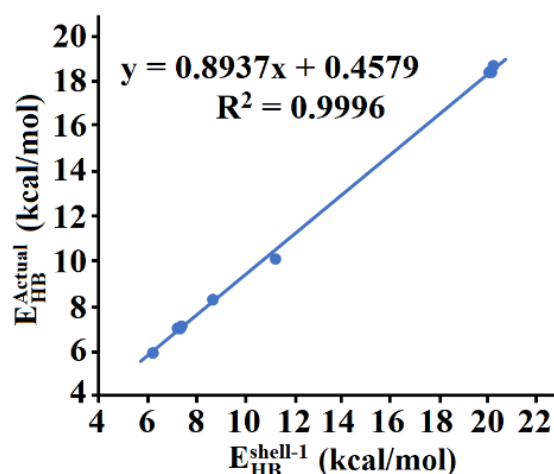

**Fig. S10** Correlation plot between the HB energy, in  $(\text{HF})_3(\text{H}_2\text{O})_5$  and  $(\text{HF})_4(\text{H}_2\text{O})_4$  clusters, estimated by the actual MTA-based method versus the shell-1 model.

**Table S13** Hydrogen bond energies (kcal/mol) in  $(\text{HF})_3(\text{H}_2\text{O})_5$  and  $(\text{HF})_4(\text{H}_2\text{O})_4$  clusters calculated using the actual and shell-1 model at MP2/aTZ level.

| HB label                                                | Distance (Å) | $E_{\text{HB}}^{\text{Actual}}$ | $E_{\text{HB}}^{\text{shell-1}}$ | $\Delta E_{\text{HB}}$ | $E_{\text{HB}}^{\text{dimer}}$ | $E_{\text{coop.}}$ |
|---------------------------------------------------------|--------------|---------------------------------|----------------------------------|------------------------|--------------------------------|--------------------|
| <b><math>(\text{HF})_3(\text{H}_2\text{O})_5</math></b> |              |                                 |                                  |                        |                                |                    |
| HB1                                                     | 1.69         | 10.1                            | 11.25                            | -1.15                  | 4.6                            | 6.65               |
| HB2                                                     | 1.85         | 8.3                             | 8.67                             | -0.37                  | 4.9                            | 3.77               |
| HB3                                                     | 1.47         | 18.4                            | 20.15                            | -1.75                  | 9.8                            | 10.35              |
| HB4                                                     | 1.87         | 7.1                             | 7.38                             | -0.28                  | 2.6                            | 4.78               |
| HB5                                                     | 1.47         | 18.7                            | 20.23                            | -1.53                  | 9.8                            | 10.43              |
| HB6                                                     | 1.91         | 7.0                             | 7.20                             | -0.2                   | 2.7                            | 4.50               |
| HB7                                                     | 1.91         | 7.0                             | 7.20                             | -0.2                   | 2.7                            | 4.50               |
| HB8                                                     | 1.47         | 18.4                            | 20.15                            | -1.75                  | 9.8                            | 10.35              |
| HB9                                                     | 1.85         | 8.3                             | 8.67                             | -0.37                  | 4.9                            | 3.77               |
| HB10                                                    | 1.97         | 5.9                             | 6.19                             | -0.29                  | 2.9                            | 3.29               |
| HB11                                                    | 1.96         | 5.9                             | 6.19                             | -0.29                  | 2.9                            | 3.29               |
| HB12                                                    | 1.87         | 7.1                             | 7.38                             | -0.28                  | 2.6                            | 4.78               |
| <b><math>(\text{HF})_4(\text{H}_2\text{O})_4</math></b> |              |                                 |                                  |                        |                                |                    |
| HB1                                                     | 1.47         | 18.4                            | 20.06                            | -1.66                  | 9.8                            | 10.26              |
| HB2                                                     | 1.90         | 7.0                             | 7.32                             | -0.32                  | 2.7                            | 4.62               |
| HB3                                                     | 1.47         | 18.4                            | 20.06                            | -1.66                  | 9.8                            | 10.26              |
| HB4                                                     | 1.90         | 7.0                             | 7.32                             | -0.32                  | 2.7                            | 4.62               |
| HB5                                                     | 1.90         | 7.0                             | 7.32                             | -0.32                  | 2.7                            | 4.62               |
| HB6                                                     | 1.47         | 18.4                            | 20.06                            | -1.66                  | 9.8                            | 10.26              |
| HB7                                                     | 1.90         | 7.0                             | 7.32                             | -0.32                  | 2.7                            | 4.62               |
| HB8                                                     | 1.90         | 7.0                             | 7.32                             | -0.32                  | 2.7                            | 4.62               |
| HB9                                                     | 1.90         | 7.0                             | 7.32                             | -0.32                  | 2.7                            | 4.62               |
| HB10                                                    | 1.47         | 18.4                            | 20.06                            | -1.66                  | 9.8                            | 10.26              |
| HB11                                                    | 1.90         | 7.0                             | 7.32                             | -0.32                  | 2.7                            | 4.62               |
| HB12                                                    | 1.90         | 7.0                             | 7.32                             | -0.32                  | 2.7                            | 4.62               |

**Table S14** Hydrogen bond energies (kcal/mol) in (HF)<sub>4</sub>(H<sub>2</sub>O)<sub>8</sub> cluster calculated using the actual, shell-1 and shell-2 model at MP2/aTZ level.

| HB label                                            | $E_{HB}^{Actual}$ | $E_{HB}^{shell-1}$ | $E_{HB}^{shell-2}$ | $\Delta E_{HB}^{Actual-shell-1}$ | $\Delta E_{HB}^{Actual-shell-2}$ | $E_{HB}^{dimer}$ | $E_{coop.}^{Actual}$ | $E_{coop.}^{shell-1}$ | $E_{coop.}^{shell-2}$ |
|-----------------------------------------------------|-------------------|--------------------|--------------------|----------------------------------|----------------------------------|------------------|----------------------|-----------------------|-----------------------|
| <b>(HF)<sub>4</sub>(H<sub>2</sub>O)<sub>8</sub></b> |                   |                    |                    |                                  |                                  |                  |                      |                       |                       |
| HB1                                                 | 18.04             | 19.34              | 17.96              | -1.30                            | 0.08                             | 9.80             | 8.24                 | 9.54                  | 8.16                  |
| HB2                                                 | 6.93              | 7.19               | 6.77               | -0.26                            | 0.16                             | 2.76             | 4.17                 | 4.43                  | 4.01                  |
| HB3                                                 | 18.04             | 19.34              | 17.96              | -1.30                            | 0.08                             | 9.80             | 8.24                 | 9.54                  | 8.16                  |
| HB4                                                 | 6.93              | 7.19               | 6.77               | -0.26                            | 0.16                             | 2.76             | 4.17                 | 4.43                  | 4.01                  |
| HB5                                                 | 8.87              | 10.18              | 8.87               | -1.31                            | 0.00                             | 4.86             | 4.01                 | 5.32                  | 4.01                  |
| HB6                                                 | 8.87              | 10.18              | 8.87               | -1.31                            | 0.00                             | 4.86             | 4.01                 | 5.32                  | 4.01                  |
| HB7                                                 | 8.87              | 10.18              | 8.87               | -1.31                            | 0.00                             | 4.86             | 4.01                 | 5.32                  | 4.01                  |
| HB8                                                 | 8.87              | 10.18              | 8.87               | -1.31                            | 0.00                             | 4.86             | 4.01                 | 5.32                  | 4.01                  |
| HB9                                                 | 6.93              | 7.19               | 6.77               | -0.26                            | 0.16                             | 2.76             | 4.17                 | 4.43                  | 4.01                  |
| HB10                                                | 18.04             | 19.34              | 17.96              | -1.30                            | 0.08                             | 9.80             | 8.24                 | 9.54                  | 8.16                  |
| HB11                                                | 6.93              | 7.19               | 6.77               | -0.26                            | 0.16                             | 2.76             | 4.17                 | 4.43                  | 4.01                  |
| HB12                                                | 18.04             | 19.34              | 17.96              | -1.30                            | 0.08                             | 9.80             | 8.24                 | 9.54                  | 8.16                  |
| HB13                                                | 7.75              | 8.25               | 7.94               | -0.50                            | -0.19                            | 4.44             | 3.31                 | 3.81                  | 3.5                   |
| HB14                                                | 5.59              | 5.61               | 5.63               | -0.02                            | -0.04                            | 2.43             | 3.16                 | 3.18                  | 3.2                   |
| HB15                                                | 7.75              | 8.25               | 7.94               | -0.5                             | -0.19                            | 4.44             | 3.31                 | 3.81                  | 3.5                   |
| HB16                                                | 5.59              | 5.61               | 5.63               | -0.02                            | -0.04                            | 2.43             | 3.16                 | 3.18                  | 3.2                   |
| HB17                                                | 5.59              | 5.61               | 5.63               | -0.02                            | -0.04                            | 2.43             | 3.16                 | 3.18                  | 3.2                   |
| HB18                                                | 7.75              | 8.25               | 7.94               | -0.50                            | -0.19                            | 4.44             | 3.31                 | 3.81                  | 3.5                   |
| HB19                                                | 5.59              | 5.61               | 5.63               | -0.02                            | -0.04                            | 2.43             | 3.16                 | 3.18                  | 3.2                   |
| HB20                                                | 7.75              | 8.25               | 7.94               | -0.50                            | -0.19                            | 4.44             | 3.31                 | 3.81                  | 3.5                   |

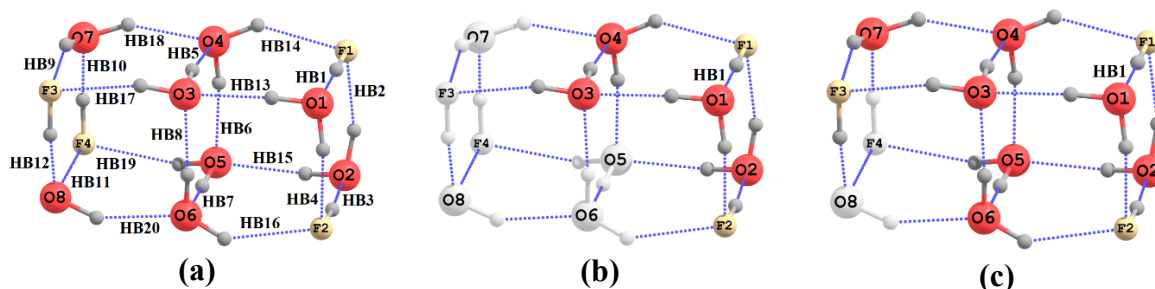

**Fig. S11** (a) The MP2/aDZ-optimized geometry of the  $(\text{HF})_4(\text{H}_2\text{O})_8$  cluster, (b) the shell-1 model and (c) the shell-2 model for estimation of energy of hydrogen bond HB1 in  $(\text{HF})_4(\text{H}_2\text{O})_8$  cluster.

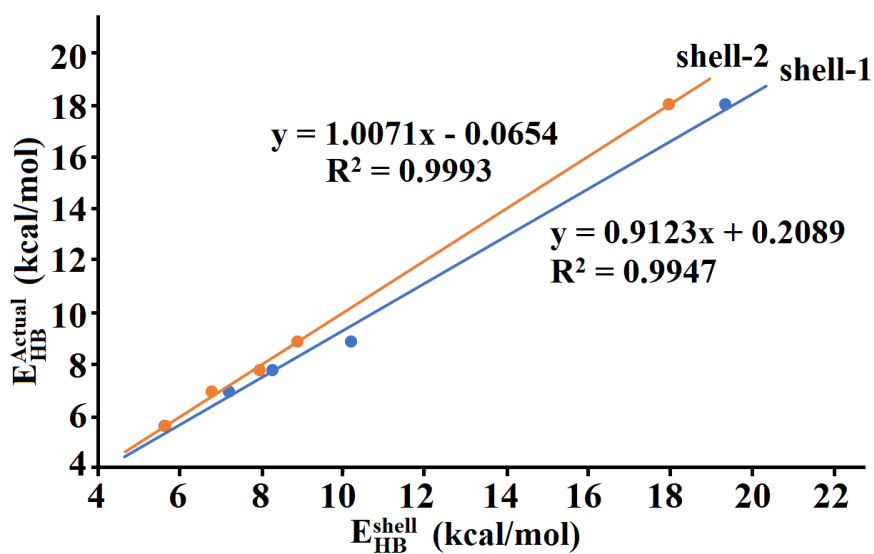

**Fig. S12** Correlation plot between the HB energy in  $(\text{HF})_4(\text{H}_2\text{O})_8$  cluster, estimated by the actual MTA-based method versus shell-1 (blue line) or the shell-2 (orange line) models.

**Table S15** Cartesian coordinates of large  $W_n$ , ( $n = 10$ -16, 18, and 20) clusters.

|                                                                       |              |              |              |                                                                       |              |              |              |
|-----------------------------------------------------------------------|--------------|--------------|--------------|-----------------------------------------------------------------------|--------------|--------------|--------------|
| <b><math>W_{10:1}</math></b><br><b>E(MP2/aTZ) = -763.445748 a.u.</b>  |              |              |              | <b><math>W_{10:2}</math></b><br><b>E(MP2/aTZ) = -763.442994 a.u.</b>  |              |              |              |
| O                                                                     | 0.993720000  | 2.391230000  | 1.066350000  | O                                                                     | 2.942410000  | -1.246460000 | 0.066280000  |
| H                                                                     | 1.371210000  | 3.140220000  | 1.543670000  | H                                                                     | 2.363640000  | -1.445920000 | 0.827040000  |
| H                                                                     | 1.625480000  | 1.645810000  | 1.197230000  | H                                                                     | 2.392570000  | -1.468310000 | -0.709630000 |
| O                                                                     | -1.683460000 | 1.482720000  | 1.388710000  | O                                                                     | 2.999550000  | 1.443090000  | 0.024670000  |
| H                                                                     | -0.779400000 | 1.852030000  | 1.366380000  | H                                                                     | 3.118500000  | 0.456670000  | 0.043160000  |
| H                                                                     | -1.981420000 | 1.520050000  | 0.458070000  | H                                                                     | 3.887690000  | 1.819940000  | 0.036690000  |
| O                                                                     | -1.700590000 | -1.133480000 | 1.901760000  | O                                                                     | 0.946920000  | 1.287480000  | -1.953110000 |
| H                                                                     | -1.716700000 | -0.141290000 | 1.809160000  | H                                                                     | 1.699840000  | 1.534610000  | -1.382700000 |
| H                                                                     | -2.261250000 | -1.338560000 | 2.659730000  | H                                                                     | 0.158020000  | 1.492680000  | -1.408610000 |
| O                                                                     | 0.946410000  | -1.944860000 | 1.432120000  | O                                                                     | 0.999390000  | -1.366340000 | -2.022280000 |
| H                                                                     | 0.036740000  | -1.714610000 | 1.710820000  | H                                                                     | 1.023770000  | -1.719130000 | -2.920120000 |
| H                                                                     | 0.839470000  | -2.288930000 | 0.523070000  | H                                                                     | 0.981710000  | -0.370610000 | -2.115660000 |
| O                                                                     | 2.551960000  | 0.141080000  | 1.157710000  | O                                                                     | -0.928850000 | -1.482640000 | -0.011920000 |
| H                                                                     | 3.346650000  | -0.005300000 | 1.685630000  | H                                                                     | -0.329430000 | -1.616260000 | -0.775840000 |
| H                                                                     | 1.963330000  | -0.648410000 | 1.336800000  | H                                                                     | -0.361240000 | -1.598630000 | 0.778810000  |
| O                                                                     | 2.075780000  | -0.197810000 | -1.700890000 | O                                                                     | 0.913530000  | -1.304590000 | 2.072060000  |
| H                                                                     | 2.462670000  | -0.041620000 | -0.821100000 | H                                                                     | 0.881480000  | -1.626740000 | 2.981120000  |
| H                                                                     | 1.504320000  | 0.594010000  | -1.840230000 | H                                                                     | 0.885570000  | -0.306950000 | 2.129320000  |
| O                                                                     | 0.610340000  | -2.373510000 | -1.343540000 | O                                                                     | 0.851640000  | 1.347940000  | 1.900320000  |
| H                                                                     | 0.891930000  | -3.078650000 | -1.938940000 | H                                                                     | 0.096350000  | 1.527210000  | 1.301240000  |
| H                                                                     | 1.173660000  | -1.579170000 | -1.572790000 | H                                                                     | 1.636140000  | 1.577000000  | 1.366070000  |
| O                                                                     | -2.033890000 | -1.509250000 | -0.917020000 | O                                                                     | -1.124720000 | 1.324570000  | -0.076560000 |
| H                                                                     | -1.158750000 | -1.870140000 | -1.166410000 | H                                                                     | -1.143930000 | 0.343650000  | -0.055950000 |
| H                                                                     | -2.042620000 | -1.559990000 | 0.057530000  | H                                                                     | -2.074760000 | 1.571620000  | -0.083100000 |
| O                                                                     | -2.225900000 | 1.114890000  | -1.361960000 | O                                                                     | -3.900210000 | 1.449800000  | -0.096140000 |
| H                                                                     | -2.197750000 | 0.121510000  | -1.290900000 | H                                                                     | -3.971490000 | 0.472220000  | -0.037050000 |
| H                                                                     | -2.992620000 | 1.318530000  | -1.911200000 | H                                                                     | -4.398510000 | 1.778860000  | 0.662220000  |
| O                                                                     | 0.441100000  | 2.023160000  | -1.771350000 | O                                                                     | -3.696260000 | -1.320440000 | 0.078460000  |
| H                                                                     | -0.499710000 | 1.761430000  | -1.747650000 | H                                                                     | -2.740550000 | -1.529510000 | 0.014790000  |
| H                                                                     | 0.611100000  | 2.359640000  | -0.873880000 | H                                                                     | -4.132610000 | -1.951750000 | -0.506070000 |
| <b><math>W_{10:3}</math></b><br><b>E(MP2/aTZ) = -763.4423504 a.u.</b> |              |              |              | <b><math>W_{10:4}</math></b><br><b>E(MP2/aTZ) = -763.4422554 a.u.</b> |              |              |              |
| O                                                                     | -2.531320000 | 0.273970000  | 1.499680000  | O                                                                     | -2.513890000 | -0.437780000 | 1.491460000  |
| H                                                                     | -3.103340000 | 0.458740000  | 2.254360000  | H                                                                     | -1.583580000 | -0.670000000 | 1.777580000  |
| H                                                                     | -1.601310000 | 0.244610000  | 1.868840000  | H                                                                     | -3.077970000 | -0.670410000 | 2.238900000  |
| O                                                                     | -2.374940000 | 1.544750000  | -1.057950000 | O                                                                     | -2.334270000 | 1.955110000  | -0.070550000 |
| H                                                                     | -2.490440000 | 1.314340000  | -0.116640000 | H                                                                     | -2.594690000 | 1.444320000  | -0.852570000 |
| H                                                                     | -2.618890000 | 0.716960000  | -1.499180000 | H                                                                     | -2.456030000 | 1.301170000  | 0.643200000  |
| O                                                                     | 0.339330000  | 2.112600000  | -1.352240000 | O                                                                     | 0.390310000  | 2.510990000  | -0.264830000 |
| H                                                                     | 0.698170000  | 1.333400000  | -1.819100000 | H                                                                     | 0.785280000  | 2.206740000  | 0.573770000  |
| H                                                                     | -0.628130000 | 1.948350000  | -1.304930000 | H                                                                     | -0.576560000 | 2.370800000  | -0.161100000 |
| O                                                                     | 1.533960000  | 2.067340000  | 1.000860000  | O                                                                     | 1.753220000  | 1.155320000  | 1.859050000  |
| H                                                                     | 1.820610000  | 2.949800000  | 1.265550000  | H                                                                     | 2.331860000  | 0.668070000  | 1.210540000  |
| H                                                                     | 1.060490000  | 2.182410000  | 0.125940000  | H                                                                     | 2.351410000  | 1.518490000  | 2.523750000  |
| O                                                                     | -0.050190000 | 0.204040000  | 2.388910000  | O                                                                     | -0.032590000 | -1.023230000 | 2.176180000  |
| H                                                                     | 0.495240000  | 0.920680000  | 2.003870000  | H                                                                     | 0.561340000  | -0.246500000 | 2.204600000  |
| H                                                                     | 0.432120000  | -0.613750000 | 2.156420000  | H                                                                     | 0.397380000  | -1.629250000 | 1.539920000  |
| O                                                                     | 1.433160000  | -1.973070000 | 1.331960000  | O                                                                     | 1.222120000  | -2.469870000 | 0.102620000  |
| H                                                                     | 2.118280000  | -1.376750000 | 0.918790000  | H                                                                     | 1.376930000  | -3.414370000 | -0.018900000 |
| H                                                                     | 1.927490000  | -2.650310000 | 1.809810000  | H                                                                     | 0.696040000  | -2.172070000 | -0.691700000 |
| O                                                                     | 2.999450000  | -0.192650000 | 0.119610000  | O                                                                     | 3.002240000  | -0.254240000 | -0.036390000 |
| H                                                                     | 2.673140000  | -0.201930000 | -0.801970000 | H                                                                     | 2.650320000  | 0.131020000  | -0.863450000 |
| H                                                                     | 2.684800000  | 0.666300000  | 0.465330000  | H                                                                     | 2.570910000  | -1.129740000 | 0.008590000  |
| O                                                                     | 1.493180000  | -0.312880000 | -2.284210000 | O                                                                     | 1.454590000  | 0.928520000  | -2.099150000 |
| H                                                                     | 1.730760000  | -0.582100000 | -3.179790000 | H                                                                     | 1.710860000  | 1.432310000  | -2.881220000 |
| H                                                                     | 0.888700000  | -1.024220000 | -1.937970000 | H                                                                     | 1.037150000  | 1.588490000  | -1.473620000 |
| O                                                                     | -0.030890000 | -2.157090000 | -1.099360000 | O                                                                     | -0.090990000 | -1.417770000 | -1.948610000 |
| H                                                                     | -0.968630000 | -1.938120000 | -0.929140000 | H                                                                     | -1.019190000 | -1.179670000 | -1.755770000 |
| H                                                                     | 0.375520000  | -2.253350000 | -0.216520000 | H                                                                     | 0.365070000  | -0.570950000 | -2.129800000 |
| O                                                                     | -2.729470000 | -1.437220000 | -0.635780000 | O                                                                     | -2.759750000 | -0.791330000 | -1.222960000 |
| H                                                                     | -2.782190000 | -0.976280000 | 0.230580000  | H                                                                     | -3.457490000 | -1.375410000 | -1.544840000 |
| H                                                                     | -3.370640000 | -2.156980000 | -0.586100000 | H                                                                     | -2.796920000 | -0.848720000 | -0.242520000 |

|                                                                  |              |              |              |                                                                  |              |              |              |
|------------------------------------------------------------------|--------------|--------------|--------------|------------------------------------------------------------------|--------------|--------------|--------------|
| <b>W<sub>10:5</sub></b><br><b>E(MP2/aTZ) = -763.4415717 a.u.</b> |              |              |              | <b>W<sub>11:1</sub></b><br><b>E(MP2/aTZ) = -839.79015 a.u.</b>   |              |              |              |
| O                                                                | 0.000000000  | -1.092250000 | 2.085120000  | O                                                                | -2.292770000 | -2.059480000 | 0.533810000  |
| H                                                                | -0.000060000 | -0.098970000 | 2.014520000  | H                                                                | -2.819780000 | -2.848970000 | 0.706370000  |
| H                                                                | 0.000020000  | -1.287120000 | 3.030190000  | H                                                                | -1.509410000 | -2.360580000 | 0.001420000  |
| O                                                                | 0.000010000  | 1.558900000  | 1.715930000  | O                                                                | -0.160490000 | -2.540190000 | -1.005240000 |
| H                                                                | 0.769480000  | 1.796350000  | 1.162330000  | H                                                                | -0.124160000 | -1.770240000 | -1.598530000 |
| H                                                                | -0.769440000 | 1.796330000  | 1.162290000  | H                                                                | 0.676690000  | -2.495170000 | -0.496590000 |
| O                                                                | 2.091830000  | 1.996880000  | -0.161410000 | O                                                                | 2.191600000  | -2.091220000 | 0.410960000  |
| H                                                                | 2.556080000  | 2.821660000  | -0.349770000 | H                                                                | 2.794100000  | -2.743550000 | 0.787920000  |
| H                                                                | 2.800460000  | 1.303370000  | -0.101530000 | H                                                                | 1.964230000  | -1.454040000 | 1.152750000  |
| O                                                                | 3.788100000  | -0.067700000 | -0.085880000 | O                                                                | 1.542550000  | -0.251460000 | 2.170730000  |
| H                                                                | 3.152330000  | -0.823980000 | 0.025720000  | H                                                                | 1.846250000  | 0.590970000  | 1.787890000  |
| H                                                                | 4.481800000  | -0.220580000 | 0.566730000  | H                                                                | 0.564600000  | -0.157990000 | 2.264140000  |
| O                                                                | 1.921680000  | -1.971780000 | 0.178040000  | O                                                                | -1.195550000 | -0.085020000 | 2.323320000  |
| H                                                                | 1.316240000  | -1.747580000 | 0.911180000  | H                                                                | -1.617320000 | -0.810810000 | 1.827390000  |
| H                                                                | 1.341220000  | -1.971730000 | -0.608050000 | H                                                                | -1.564530000 | 0.724340000  | 1.924230000  |
| O                                                                | -0.000090000 | -1.605450000 | -1.880620000 | O                                                                | -2.129130000 | 2.161790000  | 0.784930000  |
| H                                                                | -0.000090000 | -0.613350000 | -1.956660000 | H                                                                | -2.592930000 | 2.967560000  | 1.042680000  |
| H                                                                | -0.000110000 | -1.938080000 | -2.786370000 | H                                                                | -1.320020000 | 2.455400000  | 0.289080000  |
| O                                                                | 0.000050000  | 1.072190000  | -1.875750000 | O                                                                | -2.652570000 | 0.171210000  | -1.117260000 |
| H                                                                | 0.769540000  | 1.417590000  | -1.382410000 | H                                                                | -2.729210000 | -0.630780000 | -0.561640000 |
| H                                                                | -0.769310000 | 1.417750000  | -1.382330000 | H                                                                | -2.669030000 | 0.907740000  | -0.473260000 |
| O                                                                | -2.091750000 | 1.996940000  | -0.161460000 | O                                                                | -0.306170000 | 0.144720000  | -2.337090000 |
| H                                                                | -2.555970000 | 2.821730000  | -0.349840000 | H                                                                | -0.470010000 | 0.207360000  | -3.287790000 |
| H                                                                | -2.800370000 | 1.303430000  | -0.101640000 | H                                                                | -1.216400000 | 0.156420000  | -1.912980000 |
| O                                                                | -3.788080000 | -0.067610000 | -0.085880000 | O                                                                | 2.480440000  | 0.001010000  | -1.431890000 |
| H                                                                | -4.481860000 | -0.220340000 | 0.566680000  | H                                                                | 2.516740000  | -0.823780000 | -0.905940000 |
| H                                                                | -3.152400000 | -0.823940000 | 0.025890000  | H                                                                | 1.578730000  | 0.011970000  | -1.799000000 |
| O                                                                | -1.921740000 | -1.971780000 | 0.178130000  | O                                                                | 2.474840000  | 1.902160000  | 0.463630000  |
| H                                                                | -1.341330000 | -1.971720000 | -0.607990000 | H                                                                | 3.273290000  | 2.443360000  | 0.497810000  |
| H                                                                | -1.316270000 | -1.747590000 | 0.911240000  | H                                                                | 2.621130000  | 1.243110000  | -0.264770000 |
|                                                                  |              |              |              | O                                                                | 0.032810000  | 2.638550000  | -0.713990000 |
|                                                                  |              |              |              | H                                                                | 0.892140000  | 2.524430000  | -0.258900000 |
|                                                                  |              |              |              | H                                                                | 0.020430000  | 1.926740000  | -1.377480000 |
| <b>W<sub>11:2</sub></b><br><b>E(MP2/aTZ) = -839.7898948 a.u.</b> |              |              |              | <b>W<sub>11:3</sub></b><br><b>E(MP2/aTZ) = -839.7893428 a.u.</b> |              |              |              |
| O                                                                | -1.986000000 | -1.017320000 | -1.800960000 | O                                                                | -1.539920000 | 2.122240000  | 1.084660000  |
| H                                                                | -1.392050000 | -0.231860000 | -2.001510000 | H                                                                | -1.949670000 | 2.698370000  | 1.742090000  |
| H                                                                | -2.266070000 | -1.347570000 | -2.663850000 | H                                                                | -1.074930000 | 1.402000000  | 1.610080000  |
| O                                                                | -0.414930000 | 1.043870000  | -2.227140000 | O                                                                | 0.330210000  | 2.629860000  | -0.799120000 |
| H                                                                | 0.540010000  | 0.797780000  | -2.223510000 | H                                                                | -0.345900000 | 2.628590000  | -0.078840000 |
| H                                                                | -0.487480000 | 1.690800000  | -1.500400000 | H                                                                | 0.197740000  | 3.454080000  | -1.283800000 |
| O                                                                | 2.255210000  | 0.403490000  | -1.961890000 | O                                                                | 2.814000000  | 1.267550000  | -0.329850000 |
| H                                                                | 2.325110000  | -0.492720000 | -1.579890000 | H                                                                | 2.737360000  | 0.583490000  | -1.023640000 |
| H                                                                | 2.477260000  | 0.993240000  | -1.219920000 | H                                                                | 2.043270000  | 1.847190000  | -0.474360000 |
| O                                                                | 2.226370000  | -2.079330000 | -0.568000000 | O                                                                | 2.477150000  | -0.146760000 | 1.925550000  |
| H                                                                | 2.685000000  | -2.896410000 | -0.797940000 | H                                                                | 2.680770000  | 0.439100000  | 1.149050000  |
| H                                                                | 1.269260000  | -2.328050000 | -0.446360000 | H                                                                | 3.192180000  | -0.006210000 | 2.558140000  |
| O                                                                | -0.355120000 | -2.538260000 | -0.064480000 | O                                                                | -0.329330000 | 0.124250000  | 2.273600000  |
| H                                                                | -0.485230000 | -2.122880000 | 0.809720000  | H                                                                | -0.558360000 | -0.622730000 | 1.676060000  |
| H                                                                | -0.956110000 | -2.060740000 | -0.671600000 | H                                                                | 0.647210000  | 0.111420000  | 2.297680000  |
| O                                                                | -0.239230000 | -1.104590000 | 2.408600000  | O                                                                | -0.854960000 | -1.724070000 | 0.280810000  |
| H                                                                | -0.262630000 | -1.486510000 | 3.294820000  | H                                                                | -0.759280000 | -1.093470000 | -0.464960000 |
| H                                                                | 0.713340000  | -0.855210000 | 2.251180000  | H                                                                | -1.799960000 | -1.987560000 | 0.255610000  |
| O                                                                | 2.266530000  | -0.474740000 | 1.754570000  | O                                                                | 1.854570000  | -2.390450000 | 0.242850000  |
| H                                                                | 2.445180000  | -1.062840000 | 0.994070000  | H                                                                | 2.145660000  | -1.788410000 | 0.954060000  |
| H                                                                | 2.322670000  | 0.426870000  | 1.381980000  | H                                                                | 0.880520000  | -2.407650000 | 0.335540000  |
| O                                                                | 2.257870000  | 2.044000000  | 0.440080000  | O                                                                | 2.234760000  | -0.981790000 | -1.985810000 |
| H                                                                | 1.333430000  | 2.385080000  | 0.389280000  | H                                                                | 2.765380000  | -1.454990000 | -2.638290000 |
| H                                                                | 2.796050000  | 2.791740000  | 0.727490000  | H                                                                | 2.150070000  | -1.596590000 | -1.203240000 |
| O                                                                | -0.389540000 | 2.665210000  | 0.150380000  | O                                                                | -0.356050000 | 0.081100000  | -1.830820000 |
| H                                                                | -0.951370000 | 2.103920000  | 0.765400000  | H                                                                | 0.473490000  | -0.337150000 | -2.137100000 |
| H                                                                | -0.767380000 | 3.552250000  | 0.201110000  | H                                                                | -0.079990000 | 0.983180000  | -1.573560000 |
| O                                                                | -1.829610000 | 1.111530000  | 1.706720000  | O                                                                | -3.084060000 | 0.674100000  | -0.932800000 |
| H                                                                | -2.567700000 | 0.704680000  | 1.203760000  | H                                                                | -2.327420000 | 0.460360000  | -1.504530000 |
| H                                                                | -1.308620000 | 0.351840000  | 2.036300000  | H                                                                | -2.681850000 | 1.207030000  | -0.220830000 |
| O                                                                | -3.771000000 | -0.023910000 | 0.075660000  | O                                                                | -3.609070000 | -1.814870000 | 0.152390000  |
| H                                                                | -3.247560000 | -0.445680000 | -0.640320000 | H                                                                | -3.592380000 | -0.922170000 | -0.262320000 |
| H                                                                | -4.379530000 | -0.707270000 | 0.381910000  | H                                                                | -4.242230000 | -2.327220000 | -0.364270000 |

|                                                                  |              |              |              |                                                                  |              |              |              |
|------------------------------------------------------------------|--------------|--------------|--------------|------------------------------------------------------------------|--------------|--------------|--------------|
| <b>W<sub>11:4</sub></b><br><b>E(MP2/aTZ) = -839.7888741 a.u.</b> |              |              |              | <b>W<sub>11:5</sub></b><br><b>E(MP2/aTZ) = -839.7882228 a.u.</b> |              |              |              |
| O                                                                | -1.491790000 | 2.211130000  | 1.100550000  | O                                                                | 0.366430000  | -0.752050000 | -2.405040000 |
| H                                                                | -0.741950000 | 2.527220000  | 0.547800000  | H                                                                | -0.513910000 | -1.129420000 | -2.203890000 |
| H                                                                | -1.801770000 | 2.986360000  | 1.585630000  | H                                                                | 0.965600000  | -1.186390000 | -1.764150000 |
| O                                                                | -0.218380000 | -0.072350000 | 2.324750000  | O                                                                | -2.077770000 | -1.772890000 | -1.461560000 |
| H                                                                | -0.660010000 | 0.758610000  | 2.071300000  | H                                                                | -2.774850000 | -2.210480000 | -1.965170000 |
| H                                                                | -0.558510000 | -0.716080000 | 1.663530000  | H                                                                | -2.519550000 | -1.024480000 | -0.975760000 |
| O                                                                | 2.389700000  | -0.376690000 | 1.974460000  | O                                                                | -3.047230000 | 0.222460000  | 0.027140000  |
| H                                                                | 2.859340000  | -0.426440000 | 2.815950000  | H                                                                | -2.610110000 | 1.076050000  | -0.156790000 |
| H                                                                | 1.434750000  | -0.196610000 | 2.204230000  | H                                                                | -2.740610000 | -0.015340000 | 0.924710000  |
| O                                                                | 2.789830000  | 1.232820000  | -0.277660000 | O                                                                | -1.518220000 | 2.597930000  | -0.368220000 |
| H                                                                | 2.774730000  | 0.731100000  | 0.564150000  | H                                                                | -0.794850000 | 2.426100000  | -1.015340000 |
| H                                                                | 2.749230000  | 0.540100000  | -0.966150000 | H                                                                | -1.909870000 | 3.439660000  | -0.632060000 |
| O                                                                | 0.585000000  | 2.625710000  | -0.633790000 | O                                                                | 0.607660000  | 1.828470000  | -1.916970000 |
| H                                                                | 1.461190000  | 2.174020000  | -0.448850000 | H                                                                | 0.489000000  | 0.864080000  | -2.166670000 |
| H                                                                | 0.802350000  | 3.429470000  | -1.122180000 | H                                                                | 0.953000000  | 2.257850000  | -2.709670000 |
| O                                                                | -0.411530000 | 0.230770000  | -1.805500000 | O                                                                | 1.961090000  | 1.090790000  | 0.505350000  |
| H                                                                | 0.397170000  | -0.185900000 | -2.164350000 | H                                                                | 1.673010000  | 1.511010000  | -0.326490000 |
| H                                                                | -0.096170000 | 1.102440000  | -1.494520000 | H                                                                | 1.262670000  | 1.349080000  | 1.157160000  |
| O                                                                | 2.163020000  | -0.886420000 | -2.086470000 | O                                                                | -0.167860000 | 1.756130000  | 2.066940000  |
| H                                                                | 2.682350000  | -1.320180000 | -2.774600000 | H                                                                | -0.665930000 | 0.943390000  | 2.285990000  |
| H                                                                | 2.074970000  | -1.554880000 | -1.349360000 | H                                                                | -0.719530000 | 2.193110000  | 1.393900000  |
| O                                                                | 1.793560000  | -2.427510000 | 0.048680000  | O                                                                | -1.680680000 | -0.625500000 | 2.353620000  |
| H                                                                | 0.820760000  | -2.426930000 | 0.158490000  | H                                                                | -1.997400000 | -0.987670000 | 3.190130000  |
| H                                                                | 2.108470000  | -1.887360000 | 0.798810000  | H                                                                | -1.237380000 | -1.383970000 | 1.880490000  |
| O                                                                | -0.898910000 | -1.706470000 | 0.195380000  | O                                                                | -0.585250000 | -2.543220000 | 0.866740000  |
| H                                                                | -1.848780000 | -1.952710000 | 0.168520000  | H                                                                | 0.330360000  | -2.331570000 | 0.589660000  |
| H                                                                | -0.805260000 | -1.026600000 | -0.505700000 | H                                                                | -1.098510000 | -2.502410000 | 0.038090000  |
| O                                                                | -3.653270000 | -1.762640000 | 0.105930000  | O                                                                | 1.827270000  | -1.564680000 | -0.146270000 |
| H                                                                | -4.293330000 | -2.244150000 | -0.431520000 | H                                                                | 2.758310000  | -1.808950000 | -0.023660000 |
| H                                                                | -3.634090000 | -0.850010000 | -0.263220000 | H                                                                | 1.822660000  | -0.624000000 | 0.155380000  |
| O                                                                | -3.126100000 | 0.764760000  | -0.875340000 | O                                                                | 4.376450000  | -0.367840000 | 0.542190000  |
| H                                                                | -2.721310000 | 1.294620000  | -0.163800000 | H                                                                | 5.108090000  | -0.157600000 | 1.134250000  |
| H                                                                | -2.373080000 | 0.579080000  | -1.462080000 | H                                                                | 3.724650000  | 0.345110000  | 0.678420000  |
| <b>W<sub>12:1</sub></b><br><b>E(MP2/aTZ) = -916.1436611 a.u.</b> |              |              |              | <b>W<sub>12:2</sub></b><br><b>E(MP2/aTZ) = -916.1432555 a.u.</b> |              |              |              |
| O                                                                | 2.772110000  | 1.869460000  | -0.353360000 | O                                                                | -2.772320000 | 1.401520000  | -1.285740000 |
| H                                                                | 2.900110000  | 1.480480000  | 0.533520000  | H                                                                | -1.846460000 | 1.581630000  | -1.533010000 |
| H                                                                | 1.846350000  | 2.175820000  | -0.349560000 | H                                                                | -2.900680000 | 0.458330000  | -1.505520000 |
| O                                                                | 2.876610000  | -0.246750000 | -2.004630000 | O                                                                | -2.885150000 | 1.457330000  | 1.399800000  |
| H                                                                | 3.560310000  | -0.166130000 | -2.680920000 | H                                                                | -2.923020000 | 1.533000000  | 0.408550000  |
| H                                                                | 2.918350000  | 0.592620000  | -1.471820000 | H                                                                | -3.574590000 | 2.042480000  | 1.736860000  |
| O                                                                | 2.772120000  | -1.869460000 | 0.353320000  | O                                                                | -2.772300000 | -1.401550000 | 1.285750000  |
| H                                                                | 1.846360000  | -2.175810000 | 0.349530000  | H                                                                | -1.846440000 | -1.581650000 | 1.533020000  |
| H                                                                | 2.900100000  | -1.480480000 | -0.533560000 | H                                                                | -2.900680000 | -0.458370000 | 1.505540000  |
| O                                                                | 2.876650000  | 0.246760000  | 2.004610000  | O                                                                | -2.885120000 | -1.457330000 | -1.399760000 |
| H                                                                | 3.560370000  | 0.166110000  | 2.680880000  | H                                                                | -2.922810000 | -1.533140000 | -0.408530000 |
| H                                                                | 2.918340000  | -0.592620000 | 1.471800000  | H                                                                | -3.574570000 | -2.042470000 | -1.736800000 |
| O                                                                | -0.068530000 | 1.905110000  | -0.398500000 | O                                                                | 0.071230000  | 1.448260000  | -1.290920000 |
| H                                                                | -0.991140000 | 2.225770000  | -0.413500000 | H                                                                | 0.990620000  | 1.670360000  | -1.534450000 |
| H                                                                | -0.064550000 | 1.142850000  | -1.024470000 | H                                                                | 0.064990000  | 1.498390000  | -0.305400000 |
| O                                                                | 0.068490000  | -0.398510000 | -1.905080000 | O                                                                | -0.075700000 | 1.291980000  | 1.455870000  |
| H                                                                | 0.991110000  | -0.413520000 | -2.225750000 | H                                                                | -0.996550000 | 1.540450000  | 1.666040000  |
| H                                                                | 0.064520000  | -1.024480000 | -1.142810000 | H                                                                | -0.071430000 | 0.306650000  | 1.504770000  |
| O                                                                | -0.068520000 | -1.905090000 | 0.398520000  | O                                                                | 0.071320000  | -1.448270000 | 1.290910000  |
| H                                                                | -0.064540000 | -1.142820000 | 1.024470000  | H                                                                | 0.065100000  | -1.498340000 | 0.305400000  |
| H                                                                | -0.991130000 | -2.225780000 | 0.413460000  | H                                                                | 0.990710000  | -1.670330000 | 1.534500000  |
| O                                                                | 0.068540000  | 0.398510000  | 1.905100000  | O                                                                | -0.075650000 | -1.292050000 | -1.455900000 |
| H                                                                | 0.991160000  | 0.413500000  | 2.225750000  | H                                                                | -0.996520000 | -1.540470000 | -1.666080000 |
| H                                                                | 0.064550000  | 1.024490000  | 1.142850000  | H                                                                | -0.071390000 | -0.306720000 | -1.504770000 |
| O                                                                | -2.876650000 | 2.004660000  | -0.246720000 | O                                                                | 2.891580000  | 1.497250000  | -1.364290000 |
| H                                                                | -3.560320000 | 2.680990000  | -0.166220000 | H                                                                | 3.577090000  | 2.096010000  | -1.685250000 |
| H                                                                | -2.918410000 | 1.471930000  | 0.592690000  | H                                                                | 2.937870000  | 1.537620000  | -0.371110000 |
| O                                                                | -2.772130000 | -0.353340000 | -1.869420000 | O                                                                | 2.770160000  | 1.364010000  | 1.313730000  |
| H                                                                | -2.900120000 | 0.533530000  | -1.480430000 | H                                                                | 2.896860000  | 0.417100000  | 1.518630000  |
| H                                                                | -1.846370000 | -0.349530000 | -2.175770000 | H                                                                | 1.845320000  | 1.539330000  | 1.568090000  |
| O                                                                | -2.876620000 | -2.004650000 | 0.246730000  | O                                                                | 2.891680000  | -1.497180000 | 1.364280000  |
| H                                                                | -2.918380000 | -1.471850000 | -0.592650000 | H                                                                | 2.937940000  | -1.537540000 | 0.371100000  |
| H                                                                | -3.560330000 | -2.680940000 | 0.166160000  | H                                                                | 3.577230000  | -2.095920000 | 1.685200000  |
| O                                                                | -2.772070000 | 0.353310000  | 1.869450000  | O                                                                | 2.770170000  | -1.363970000 | -1.313730000 |
| H                                                                | -2.900060000 | -0.533560000 | 1.480450000  | H                                                                | 1.845340000  | -1.539330000 | -1.568100000 |
| H                                                                | -1.846310000 | 0.349490000  | 2.175800000  | H                                                                | 2.896820000  | -0.417050000 | -1.518630000 |

|                                                                  |              |              |                                                                  |   |              |              |              |
|------------------------------------------------------------------|--------------|--------------|------------------------------------------------------------------|---|--------------|--------------|--------------|
| <b>W<sub>12:3</sub></b><br><b>E(MP2/aTZ) = -916.1432537 a.u.</b> |              |              | <b>W<sub>12:4</sub></b><br><b>E(MP2/aTZ) = -916.14288 a.u.</b>   |   |              |              |              |
| O                                                                | -1.356950000 | -1.321260000 | 2.771130000                                                      | O | 2.768120000  | -0.480920000 | 1.831300000  |
| H                                                                | -0.408380000 | -1.520510000 | 2.893900000                                                      | H | 2.896720000  | 0.434240000  | 1.514090000  |
| H                                                                | -1.533940000 | -1.574920000 | 1.846300000                                                      | H | 1.842730000  | -0.497910000 | 2.138020000  |
| O                                                                | -1.506260000 | 1.355370000  | 2.890460000                                                      | O | 2.900910000  | 1.988710000  | 0.385540000  |
| H                                                                | -1.541130000 | 0.361780000  | 2.936480000                                                      | H | 3.589830000  | 2.663440000  | 0.346020000  |
| H                                                                | -2.102710000 | 1.672740000  | 3.579630000                                                      | H | 2.942750000  | 1.505740000  | -0.483410000 |
| O                                                                | 1.356950000  | 1.321260000  | 2.771130000                                                      | O | 2.768080000  | 0.480920000  | -1.831320000 |
| H                                                                | 0.408380000  | 1.520510000  | 2.893900000                                                      | H | 1.842670000  | 0.497860000  | -2.137990000 |
| H                                                                | 1.533940000  | 1.574920000  | 1.846300000                                                      | H | 2.896740000  | -0.434240000 | -1.514090000 |
| O                                                                | 1.506260000  | -1.355370000 | 2.890460000                                                      | O | 2.900960000  | -1.988640000 | -0.385530000 |
| H                                                                | 2.102710000  | -1.672740000 | 3.579630000                                                      | H | 2.942610000  | -1.505700000 | 0.483450000  |
| H                                                                | 1.541130000  | -0.361780000 | 2.936480000                                                      | H | 3.589940000  | -2.663310000 | -0.345900000 |
| O                                                                | -1.286050000 | -1.459200000 | -0.073490000                                                     | O | -0.079450000 | -0.354480000 | 1.907840000  |
| H                                                                | -1.533910000 | -1.672800000 | -0.993560000                                                     | H | -0.997400000 | -0.444810000 | 2.228340000  |
| H                                                                | -0.300280000 | -1.505150000 | -0.069000000                                                     | H | -0.072810000 | 0.514970000  | 1.440740000  |
| O                                                                | -1.451260000 | 1.287980000  | 0.069510000                                                      | O | 0.079440000  | 1.907960000  | 0.354360000  |
| H                                                                | -1.676700000 | 1.529480000  | 0.988550000                                                      | H | 0.997400000  | 2.228440000  | 0.444820000  |
| H                                                                | -1.497850000 | 0.302300000  | 0.062480000                                                      | H | 0.072820000  | 1.441170000  | -0.515240000 |
| O                                                                | 1.286050000  | 1.459200000  | -0.073490000                                                     | O | -0.079470000 | 0.354380000  | -1.907780000 |
| H                                                                | 1.533910000  | 1.672800000  | -0.993560000                                                     | H | -0.997410000 | 0.444770000  | -2.228310000 |
| H                                                                | 0.300280000  | 1.505150000  | -0.069000000                                                     | H | -0.072870000 | -0.514990000 | -1.440550000 |
| O                                                                | 1.451260000  | -1.287980000 | 0.069510000                                                      | O | 0.079460000  | -1.908010000 | -0.354400000 |
| H                                                                | 1.497850000  | -0.302300000 | 0.062480000                                                      | H | 0.997410000  | -2.228450000 | -0.444910000 |
| H                                                                | 1.676700000  | -1.529480000 | 0.988550000                                                      | H | 0.072840000  | -1.441170000 | 0.515180000  |
| O                                                                | -1.451260000 | -1.407180000 | -2.883810000                                                     | O | -2.900950000 | -0.385500000 | 1.988640000  |
| H                                                                | -2.029700000 | -1.747880000 | -3.577080000                                                     | H | -2.942780000 | 0.483440000  | 1.505660000  |
| H                                                                | -1.532240000 | -0.416220000 | -2.922530000                                                     | H | -3.589880000 | -0.345950000 | 2.663370000  |
| O                                                                | -1.408760000 | 1.277500000  | -2.773600000                                                     | O | -2.768090000 | 1.831390000  | 0.480890000  |
| H                                                                | -0.466370000 | 1.502290000  | -2.898800000                                                     | H | -1.842690000 | 2.138100000  | 0.497870000  |
| H                                                                | -1.593010000 | 1.522670000  | -1.847950000                                                     | H | -2.896720000 | 1.514150000  | -0.434260000 |
| O                                                                | 1.451260000  | 1.407180000  | -2.883810000                                                     | O | -2.900870000 | 0.385520000  | -1.988630000 |
| H                                                                | 1.532240000  | 0.416220000  | -2.922530000                                                     | H | -3.589780000 | 0.345900000  | -2.663370000 |
| H                                                                | 2.029700000  | 1.747880000  | -3.577080000                                                     | H | -2.942580000 | -0.483450000 | -1.505680000 |
| O                                                                | 1.408760000  | -1.277500000 | -2.773600000                                                     | O | -2.768150000 | -1.831330000 | -0.480930000 |
| H                                                                | 1.593010000  | -1.522670000 | -1.847950000                                                     | H | -2.896760000 | -1.514100000 | 0.434230000  |
| H                                                                | 0.466370000  | -1.502290000 | -2.898800000                                                     | H | -1.842760000 | -2.138090000 | -0.497890000 |
| <b>W<sub>12:5</sub></b><br><b>E(MP2/aTZ) = -916.1428818 a.u.</b> |              |              | <b>W<sub>13:1</sub></b><br><b>E(MP2/aTZ) = -992.4881084 a.u.</b> |   |              |              |              |
| O                                                                | -2.767740000 | -1.846480000 | -0.418990000                                                     | O | -2.997564044 | 0.309669061  | 1.910014780  |
| H                                                                | -2.897120000 | -1.498170000 | 0.484680000                                                      | H | -3.200403723 | -0.524984967 | 1.442667691  |
| H                                                                | -1.842480000 | -2.154000000 | -0.424520000                                                     | H | -2.078750230 | 0.206481630  | 2.210653551  |
| O                                                                | -2.901310000 | 0.317680000  | -2.000220000                                                     | O | -3.428483804 | -1.822898353 | 0.073918992  |
| H                                                                | -2.942590000 | -0.534840000 | -1.488610000                                                     | H | -4.190137985 | -2.396995509 | -0.072065529 |
| H                                                                | -3.589460000 | 0.255030000  | -2.673990000                                                     | H | -3.373050360 | -1.233994067 | -0.723581503 |
| O                                                                | -2.767750000 | 1.846460000  | 0.419020000                                                      | O | -3.007674877 | -0.053580740 | -1.912947382 |
| H                                                                | -2.897110000 | 1.498160000  | -0.484660000                                                     | H | -3.060616593 | 0.803778250  | -1.444918819 |
| H                                                                | -1.842490000 | 2.153990000  | 0.424560000                                                      | H | -2.082941746 | -0.112744853 | -2.206602483 |
| O                                                                | -2.901290000 | -0.317670000 | 2.000210000                                                      | O | -3.026670068 | 2.111042580  | -0.089227162 |
| H                                                                | -3.589450000 | -0.254940000 | 2.673950000                                                      | H | -3.642800786 | 2.840630544  | 0.048863937  |
| H                                                                | -2.942520000 | 0.534830000  | 1.488550000                                                      | H | -3.103222790 | 1.531651764  | 0.713426715  |
| O                                                                | 0.079530000  | -1.919130000 | -0.288460000                                                     | O | -0.084810737 | -0.026563281 | 1.880904676  |
| H                                                                | 0.997520000  | -2.242420000 | -0.367970000                                                     | H | -0.236465279 | -0.816678457 | 1.308184441  |
| H                                                                | 0.072880000  | -1.422340000 | 0.564360000                                                      | H | 0.825921396  | -0.148888388 | 2.208747182  |
| O                                                                | -0.079540000 | 0.288530000  | -1.919100000                                                     | O | -0.581432488 | -2.028853410 | 0.084526582  |
| H                                                                | -0.072880000 | -0.564240000 | -1.422240000                                                     | H | -1.530747807 | -2.246923654 | 0.096777712  |
| H                                                                | -0.997530000 | 0.367990000  | -2.242390000                                                     | H | -0.464325592 | -1.446492772 | -0.704875398 |
| O                                                                | 0.079550000  | 1.919150000  | 0.288490000                                                      | O | -0.073001118 | -0.206990809 | -1.897597713 |
| H                                                                | 0.072900000  | 1.422270000  | -0.564280000                                                     | H | 0.003360714  | 0.604733834  | -1.346239826 |
| H                                                                | 0.997540000  | 2.242420000  | 0.368010000                                                      | H | 0.840512061  | -0.418463912 | -2.165998125 |
| O                                                                | -0.079550000 | -0.288450000 | 1.919070000                                                      | O | -0.163029009 | 1.874020649  | -0.073674360 |
| H                                                                | -0.997530000 | -0.367930000 | 2.242380000                                                      | H | -1.087053601 | 2.183567542  | -0.096179100 |
| H                                                                | -0.072910000 | 0.564260000  | 1.422090000                                                      | H | -0.121385914 | 1.267532310  | 0.707524574  |
| O                                                                | 2.901270000  | -2.000260000 | -0.317700000                                                     | O | 2.711950960  | -0.593229037 | 2.081309339  |
| H                                                                | 3.589410000  | -2.674030000 | -0.255070000                                                     | H | 3.082423153  | 0.002593852  | 1.372263518  |
| H                                                                | 2.942560000  | -1.488660000 | 0.534820000                                                      | H | 3.381355773  | -0.616908947 | 2.776119901  |
| O                                                                | 2.767750000  | 0.419020000  | -1.846450000                                                     | O | 2.201673395  | -2.650358078 | 0.186819059  |
| H                                                                | 2.897100000  | -0.484660000 | -1.498170000                                                     | H | 2.423100973  | -2.081575916 | 0.951794794  |
| H                                                                | 1.842480000  | 0.424590000  | -2.153970000                                                     | H | 1.233724240  | -2.739138116 | 0.235412174  |
| O                                                                | 2.901360000  | 2.000190000  | 0.317690000                                                      | O | 2.679246607  | -1.046399562 | -1.931345171 |
| H                                                                | 2.942570000  | 1.488530000  | -0.534810000                                                     | H | 2.553123687  | -1.727315705 | -1.218988141 |
| H                                                                | 3.589550000  | 2.673900000  | 0.254960000                                                      | H | 3.236960166  | -1.466925490 | -2.597506687 |
| O                                                                | 2.767740000  | -0.419020000 | 1.846460000                                                      | O | 3.590616588  | 0.835036857  | 0.014339580  |
| H                                                                | 1.842460000  | -0.424530000 | 2.153960000                                                      | H | 3.377966546  | 0.308321385  | -0.779798861 |
| H                                                                | 2.897130000  | 0.484650000  | 1.498160000                                                      | H | 3.197206180  | 1.717338420  | -0.147382701 |
|                                                                  |              |              |                                                                  | O | 2.233262566  | 3.244774332  | -0.418463138 |
|                                                                  |              |              |                                                                  | H | 2.349169385  | 4.016846203  | 0.148552533  |
|                                                                  |              |              |                                                                  | H | 1.319707407  | 2.935961201  | -0.251560366 |



| <b>W<sub>13:2</sub></b><br><b>E(MP2/aTZ) = -992.4870506 a.u.</b> |              |              |              | <b>W<sub>13:3</sub></b><br><b>E(MP2/aTZ) = -992.4869148 a.u.</b> |              |              |              |
|------------------------------------------------------------------|--------------|--------------|--------------|------------------------------------------------------------------|--------------|--------------|--------------|
| O                                                                | 2.741597252  | 1.115722032  | 1.916764792  | O                                                                | -2.914752791 | -2.171692983 | -0.520650880 |
| H                                                                | 1.793424185  | 1.336430575  | 1.920678037  | H                                                                | -3.524014588 | -2.919066332 | -0.503472064 |
| H                                                                | 3.059500321  | 1.439386429  | 1.050377028  | H                                                                | -3.019738140 | -1.704510739 | 0.358399867  |
| O                                                                | 3.501420450  | 1.547477189  | -0.792537656 | O                                                                | -3.020442858 | -0.713702711 | 1.695215934  |
| H                                                                | 3.569614488  | 0.573033661  | -0.970809450 | H                                                                | -2.088283041 | -0.607557655 | 2.006597208  |
| H                                                                | 4.301049668  | 1.939289664  | -1.164454232 | H                                                                | -3.243430393 | 0.161637795  | 1.333483078  |
| O                                                                | 3.404584652  | -1.132668569 | -1.073266369 | O                                                                | -3.266289981 | 1.669391636  | -0.053652925 |
| H                                                                | 3.313653073  | -1.455506668 | -0.154294997 | H                                                                | -4.021049763 | 2.225179932  | -0.282121104 |
| H                                                                | 2.559356071  | -1.365621168 | -1.493667059 | H                                                                | -3.055735866 | 1.154160818  | -0.872363772 |
| O                                                                | 2.929594273  | -1.558858926 | 1.697565385  | O                                                                | -2.601695323 | 0.063395208  | -2.141353378 |
| H                                                                | 3.493762727  | -1.958829871 | 2.370629644  | H                                                                | -2.764914715 | -0.806145887 | -1.716586204 |
| H                                                                | 2.926572511  | -0.583881607 | 1.889919100  | H                                                                | -1.663738278 | 0.044316453  | -2.385587341 |
| O                                                                | -0.073550826 | 1.214397449  | 1.278715079  | O                                                                | -0.115830479 | -1.713648852 | -0.294219801 |
| H                                                                | 0.143844785  | 1.399057220  | 0.332972735  | H                                                                | -0.991203548 | -2.096546199 | -0.483695741 |
| H                                                                | -0.961607101 | 1.594549900  | 1.396905440  | H                                                                | 0.028428025  | -1.014933838 | -0.977258320 |
| O                                                                | 0.674344073  | 1.462554327  | -1.342182748 | O                                                                | -0.275890078 | -0.289771252 | 2.052591131  |
| H                                                                | 0.709073103  | 0.495670415  | -1.545434986 | H                                                                | -0.434819259 | 0.649663703  | 1.767793221  |
| H                                                                | 1.606033045  | 1.745127422  | -1.351581069 | H                                                                | -0.220572699 | -0.791587285 | 1.204121544  |
| O                                                                | 0.558544394  | -1.245234348 | -1.648272297 | O                                                                | -0.825367382 | 2.220419430  | 1.215163535  |
| H                                                                | -0.289727468 | -1.408056271 | -2.098352120 | H                                                                | -1.687237948 | 2.202392824  | 0.755095580  |
| H                                                                | 0.367082729  | -1.442943336 | -0.699129619 | H                                                                | -0.186183792 | 2.507011551  | 0.533155246  |
| O                                                                | 0.132008475  | -1.520864185 | 1.039099275  | O                                                                | 0.470385278  | 0.236397210  | -2.110035960 |
| H                                                                | 0.990977513  | -1.756504806 | 1.433853368  | H                                                                | 1.379308232  | -0.061282948 | -2.301456180 |
| H                                                                | 0.014393174  | -0.566249631 | 1.256596534  | H                                                                | 0.604857056  | 1.127923959  | -1.725399767 |
| O                                                                | -2.830711433 | 2.054469540  | 0.813140608  | O                                                                | 2.594662378  | -2.307999496 | 0.235059288  |
| H                                                                | -3.212433691 | 2.938658406  | 0.876483535  | H                                                                | 1.633651933  | -2.395791229 | 0.094047534  |
| H                                                                | -2.649925517 | 1.913302597  | -0.155875045 | H                                                                | 2.647403775  | -1.776758317 | 1.054402155  |
| O                                                                | -2.185265901 | 1.579104909  | -1.743676864 | O                                                                | 2.376791848  | -0.376437960 | 2.324185426  |
| H                                                                | -2.288697558 | 0.635320413  | -1.988347500 | H                                                                | 2.681164052  | -0.394294203 | 3.239786143  |
| H                                                                | -1.229575138 | 1.740793619  | -1.824361150 | H                                                                | 1.378163102  | -0.323971088 | 2.368827290  |
| O                                                                | -2.276653379 | -1.199823784 | -2.205448195 | O                                                                | 3.214305913  | 1.370952931  | 0.243824887  |
| H                                                                | -2.461329034 | -1.581907729 | -1.303020440 | H                                                                | 2.993440745  | 0.841061029  | 1.036869933  |
| H                                                                | -2.870054806 | -1.662922961 | -2.809450527 | H                                                                | 3.393991521  | 0.707088230  | -0.450553049 |
| O                                                                | -2.574969492 | -2.124518695 | 0.277840423  | O                                                                | 3.218225889  | -0.645992414 | -1.772790528 |
| H                                                                | -1.696596235 | -2.153236121 | 0.694836310  | H                                                                | 3.945432802  | -0.968979702 | -2.319082245 |
| H                                                                | -3.097598508 | -1.525991131 | 0.854383821  | H                                                                | 3.065972294  | -1.349957644 | -1.086065777 |
| O                                                                | -3.932338982 | -0.273609512 | 1.839309621  | O                                                                | 1.115205179  | 2.627243371  | -0.760074569 |
| H                                                                | -4.896025556 | -0.247644543 | 1.876792224  | H                                                                | 1.943679940  | 2.248669839  | -0.347778330 |
| H                                                                | -3.661249805 | 0.610058377  | 1.509862772  | H                                                                | 1.371537077  | 3.480123281  | -1.132338461 |

| <b>W<sub>13:4</sub></b><br><b>E(MP2/aTZ) = -992.4844824 a.u.</b> |              |              |              | <b>W<sub>13:5</sub></b><br><b>E(MP2/aTZ) = -992.4769471 a.u.</b> |              |              |              |
|------------------------------------------------------------------|--------------|--------------|--------------|------------------------------------------------------------------|--------------|--------------|--------------|
| O                                                                | 3.410011192  | 0.625428764  | 1.517896561  | O                                                                | -2.266157993 | 1.225642055  | 2.065896083  |
| H                                                                | 2.572616066  | 1.070450747  | 1.734493074  | H                                                                | -2.551357490 | 1.587054558  | 1.202708032  |
| H                                                                | 3.594566645  | 0.894502385  | 0.595880056  | H                                                                | -1.351479511 | 1.544850287  | 2.150514567  |
| O                                                                | 3.619985515  | 0.981653274  | -1.295095614 | O                                                                | -2.795015642 | 2.155523200  | -0.559847962 |
| H                                                                | 4.394587332  | 1.202088476  | -1.826771202 | H                                                                | -2.872578633 | 1.319252801  | -1.093815189 |
| H                                                                | 3.430684486  | 0.023627129  | -1.476211575 | H                                                                | -3.557939647 | 2.691479334  | -0.808986030 |
| O                                                                | 2.900679519  | -1.609235981 | -1.514024594 | O                                                                | -2.750020590 | -0.109715486 | -1.989604935 |
| H                                                                | 1.953023508  | -1.633469091 | -1.732353490 | H                                                                | -1.866552365 | -0.087415991 | -2.403447540 |
| H                                                                | 2.943028149  | -1.930520636 | -0.591069349 | H                                                                | -2.733949332 | -0.937143787 | -1.467122375 |
| O                                                                | 2.912084351  | -2.018171208 | 1.296828596  | O                                                                | -2.335122430 | -2.444022580 | -0.430676646 |
| H                                                                | 3.505130221  | -2.557029714 | 1.834593528  | H                                                                | -2.298773423 | -2.134463680 | 0.517339453  |
| H                                                                | 3.162237278  | -1.074855830 | 1.480311707  | H                                                                | -2.916650496 | -3.214283519 | -0.428934617 |
| O                                                                | 0.601258763  | 1.268380107  | 1.570757768  | O                                                                | -2.020875640 | -1.515570663 | 2.043407255  |
| H                                                                | -0.238279805 | 1.689335134  | 1.827356997  | H                                                                | -1.070177473 | -1.584040441 | 2.226250798  |
| H                                                                | 0.386758334  | 0.306821610  | 1.513453665  | H                                                                | -2.190054900 | -0.543380315 | 2.083246786  |
| O                                                                | 0.830726480  | 1.669552050  | -1.142685375 | O                                                                | 0.583429610  | 1.690126120  | 1.696360033  |
| H                                                                | 0.810651537  | 1.625205522  | -0.157552599 | H                                                                | 0.476782401  | 1.880628296  | 0.733636923  |
| H                                                                | 1.778556628  | 1.705942435  | -1.364333399 | H                                                                | 1.295834311  | 2.272162946  | 1.990589035  |
| O                                                                | 0.097672958  | -0.939948346 | -1.574203620 | O                                                                | 0.074444353  | 2.221219931  | -0.935937230 |
| H                                                                | -0.831628533 | -0.958365480 | -1.866858272 | H                                                                | -0.860680663 | 2.490208663  | -0.878400435 |
| H                                                                | 0.324547398  | 0.019922964  | -1.530672229 | H                                                                | 0.066716513  | 1.462374233  | -1.562893847 |
| O                                                                | 0.103777359  | -1.396347388 | 1.120907952  | O                                                                | 0.031863120  | 0.021211074  | -2.559425743 |
| H                                                                | 0.933471717  | -1.853840952 | 1.345909266  | H                                                                | 0.582939690  | -0.127508470 | -3.337873685 |
| H                                                                | 0.108640156  | -1.343454885 | 0.133640007  | H                                                                | 0.250176289  | -0.711775803 | -1.914934465 |
| O                                                                | -2.180647741 | 2.028532635  | 1.539601518  | O                                                                | 0.451654304  | -1.866056200 | -0.769843493 |
| H                                                                | -2.160912142 | 2.219941436  | 0.563231639  | H                                                                | 0.596242910  | -1.578763763 | 0.169059310  |
| H                                                                | -2.763174192 | 2.694159651  | 1.925733981  | H                                                                | -0.408300468 | -2.326568104 | -0.743623947 |
| O                                                                | -2.003484070 | 2.265990592  | -1.131157090 | O                                                                | 0.895321634  | -1.093897470 | 1.785080304  |
| H                                                                | -1.065835531 | 2.280205366  | -1.388033622 | H                                                                | 1.824736527  | -1.341294999 | 1.963520791  |
| H                                                                | -2.334133236 | 1.407822614  | -1.467980594 | H                                                                | 0.879431945  | -0.115726002 | 1.833630055  |
| O                                                                | -2.713692578 | -0.425600915 | -1.571300986 | O                                                                | 3.622271484  | -1.748698964 | 1.661848546  |
| H                                                                | -2.689729356 | -0.574574390 | -0.599574051 | H                                                                | 4.442324340  | -1.507307698 | 2.107650823  |
| H                                                                | -3.566177066 | -0.816156882 | -1.816942851 | H                                                                | 3.689868015  | -1.369476110 | 0.757928259  |
| O                                                                | -2.654565941 | -0.711270137 | 1.209929083  | O                                                                | 3.318847747  | -0.781206576 | -0.924028400 |
| H                                                                | -1.802750120 | -1.124324839 | 1.438053267  | H                                                                | 3.087927589  | 0.168015607  | -0.941389530 |
| H                                                                | -2.567537633 | 0.223745717  | 1.492302194  | H                                                                | 2.491594875  | -1.247153195 | -1.118544912 |
| O                                                                | -4.942583401 | -1.694028629 | -0.160141596 | O                                                                | 2.892882992  | 2.069793019  | -0.890025790 |
| H                                                                | -5.643840799 | -2.219058281 | 0.243052834  | H                                                                | 1.990800946  | 2.415508022  | -1.006220892 |
| H                                                                | -4.317757898 | -1.503675225 | 0.561931197  | H                                                                | 3.430740259  | 2.561799613  | -1.523179569 |

| <b>W<sub>14:1</sub></b><br><b>E(MP2/aTZ) = -1068.835622 a.u.</b> |              |              |              | <b>W<sub>14:2</sub></b><br><b>E(MP2/aTZ) = -1068.835392 a.u.</b> |              |              |              |
|------------------------------------------------------------------|--------------|--------------|--------------|------------------------------------------------------------------|--------------|--------------|--------------|
| O                                                                | -3.323387000 | -2.026150000 | 0.314178000  | O                                                                | 3.664271000  | 1.535343000  | 1.156020000  |
| H                                                                | -3.989767000 | -2.721288000 | 0.252447000  | H                                                                | 3.677798000  | 1.455518000  | 0.170649000  |
| H                                                                | -3.331973000 | -1.560679000 | -0.569431000 | H                                                                | 4.427072000  | 2.081204000  | 1.382784000  |
| O                                                                | -3.169185000 | -0.580802000 | -1.917787000 | O                                                                | 3.420228000  | 1.052946000  | -1.517891000 |
| H                                                                | -2.222597000 | -0.574128000 | -2.150641000 | H                                                                | 3.391841000  | 0.078849000  | -1.576297000 |
| H                                                                | -3.347072000 | 0.335194000  | -1.622331000 | H                                                                | 2.513247000  | 1.324877000  | -1.739324000 |
| O                                                                | -3.457382000 | 1.868610000  | -0.542980000 | O                                                                | 3.063634000  | -1.798210000 | -1.176911000 |
| H                                                                | -4.153860000 | 2.536071000  | -0.546170000 | H                                                                | 3.177176000  | -1.672364000 | -0.182589000 |
| H                                                                | -3.484780000 | 1.452501000  | 0.351967000  | H                                                                | 3.677898000  | -2.499918000 | -1.426009000 |
| O                                                                | -3.326515000 | 0.410033000  | 1.756228000  | O                                                                | 3.184111000  | -1.283293000 | 1.396717000  |
| H                                                                | -3.417849000 | -0.492100000 | 1.387765000  | H                                                                | 3.470430000  | -0.354362000 | 1.492204000  |
| H                                                                | -2.413938000 | 0.438189000  | 2.085689000  | H                                                                | 2.234429000  | -1.259831000 | 1.667711000  |
| O                                                                | -0.511916000 | -1.846544000 | 0.692475000  | O                                                                | 0.703305000  | 1.714172000  | 1.210273000  |
| H                                                                | -0.506381000 | -1.243415000 | 1.469950000  | H                                                                | 1.629234000  | 1.922901000  | 1.420199000  |
| H                                                                | -1.434049000 | -2.160681000 | 0.635480000  | H                                                                | 0.695072000  | 1.635236000  | 0.224523000  |
| O                                                                | -0.328757000 | -0.540038000 | -1.734339000 | O                                                                | 0.532065000  | 1.289148000  | -1.486828000 |
| H                                                                | -0.334878000 | -0.985560000 | -0.856179000 | H                                                                | 0.389006000  | 0.315753000  | -1.489353000 |
| H                                                                | 0.524540000  | -0.789483000 | -2.135724000 | H                                                                | -0.315036000 | 1.674287000  | -1.779399000 |
| O                                                                | -0.572558000 | 2.171228000  | -1.366987000 | O                                                                | 0.421286000  | -1.415382000 | -1.103630000 |
| H                                                                | -1.476747000 | 2.273432000  | -1.030641000 | H                                                                | -0.325732000 | -2.011106000 | -1.336874000 |
| H                                                                | -0.481831000 | 1.204105000  | -1.526763000 | H                                                                | 1.287660000  | -1.821052000 | -1.333214000 |
| O                                                                | -0.532963000 | 0.013718000  | 2.723991000  | O                                                                | 0.440171000  | -1.019016000 | 1.634230000  |
| H                                                                | -0.502674000 | -0.227868000 | 3.658370000  | H                                                                | 0.448616000  | -0.034503000 | 1.654388000  |
| H                                                                | 0.292346000  | 0.544161000  | 2.570568000  | H                                                                | 0.425455000  | -1.196924000 | 0.664603000  |
| O                                                                | 2.202831000  | -2.575090000 | 0.109865000  | O                                                                | -2.073727000 | 2.427428000  | 0.996111000  |
| H                                                                | 1.254232000  | -2.529629000 | 0.328085000  | H                                                                | -2.571505000 | 1.650970000  | 1.323624000  |
| H                                                                | 2.252351000  | -2.287028000 | -0.823297000 | H                                                                | -1.161859000 | 2.305449000  | 1.314828000  |
| O                                                                | 2.358701000  | -1.211234000 | -2.373967000 | O                                                                | -2.141396000 | 2.228180000  | -1.672117000 |
| H                                                                | 2.830345000  | -0.417430000 | -2.002478000 | H                                                                | -2.542702000 | 3.002537000  | -2.085388000 |
| H                                                                | 2.804094000  | -1.419780000 | -3.203958000 | H                                                                | -2.140602000 | 2.412970000  | -0.693429000 |
| O                                                                | 3.549254000  | 0.818736000  | -1.100623000 | O                                                                | -3.439759000 | -0.274308000 | -1.302636000 |
| H                                                                | 3.756181000  | 0.402809000  | -0.241541000 | H                                                                | -3.029597000 | 0.564118000  | -1.593789000 |
| H                                                                | 2.961932000  | 1.564840000  | -0.867870000 | H                                                                | -3.691304000 | -0.095985000 | -0.374520000 |
| O                                                                | 3.610794000  | -0.649744000 | 1.331700000  | O                                                                | -3.625286000 | 0.124435000  | 1.491207000  |
| H                                                                | 3.112377000  | -1.425530000 | 0.957698000  | H                                                                | -3.094726000 | -0.703771000 | 1.671318000  |
| H                                                                | 4.340115000  | -1.025307000 | 1.839661000  | H                                                                | -4.365068000 | 0.101785000  | 2.110531000  |
| O                                                                | 1.771581000  | 1.316883000  | 2.241049000  | O                                                                | -2.117158000 | -2.042306000 | 1.730303000  |
| H                                                                | 2.448494000  | 0.652665000  | 2.006851000  | H                                                                | -1.194602000 | -1.710897000 | 1.848877000  |
| H                                                                | 1.759878000  | 1.930622000  | 1.481677000  | H                                                                | -2.105150000 | -2.435685000 | 0.840355000  |
| O                                                                | 1.736467000  | 2.815381000  | -0.173086000 | O                                                                | -2.016592000 | -2.518865000 | -1.223269000 |
| H                                                                | 1.926332000  | 3.754979000  | -0.284645000 | H                                                                | -2.451106000 | -3.183817000 | -1.771464000 |
| H                                                                | 0.844229000  | 2.674456000  | -0.582307000 | H                                                                | -2.558497000 | -1.687131000 | -1.334252000 |

| <b>W<sub>14:3</sub></b><br><b>E(MP2/aTZ) = -1068.833227 a.u.</b> |              |              |              | <b>W<sub>14:4</sub></b><br><b>E(MP2/aTZ) = -1068.832449 a.u.</b> |              |              |              |
|------------------------------------------------------------------|--------------|--------------|--------------|------------------------------------------------------------------|--------------|--------------|--------------|
| O                                                                | -3.508232000 | 1.016237000  | -1.194527000 | O                                                                | -4.063929000 | 1.008054000  | -1.162668000 |
| H                                                                | -3.472422000 | 0.031464000  | -1.260258000 | H                                                                | -4.103089000 | 0.839174000  | -0.184487000 |
| H                                                                | -4.375617000 | 1.269807000  | -1.533067000 | H                                                                | -4.901792000 | 1.428641000  | -1.391431000 |
| O                                                                | -2.492468000 | 2.007468000  | 1.266628000  | O                                                                | -3.898727000 | 0.346595000  | 1.445744000  |
| H                                                                | -1.634609000 | 2.398936000  | 1.031550000  | H                                                                | -3.739980000 | -0.618265000 | 1.420509000  |
| H                                                                | -2.877592000 | 1.719275000  | 0.415028000  | H                                                                | -3.068775000 | 0.717150000  | 1.792667000  |
| O                                                                | -2.053560000 | -0.109555000 | 2.858588000  | O                                                                | -3.209637000 | -2.351318000 | 0.880066000  |
| H                                                                | -2.297556000 | 0.693095000  | 2.327126000  | H                                                                | -3.228606000 | -2.201023000 | -0.101010000 |
| H                                                                | -2.540733000 | -0.032728000 | 3.688037000  | H                                                                | -3.719118000 | -3.156568000 | 1.032551000  |
| O                                                                | -2.074077000 | -2.311890000 | 1.087445000  | O                                                                | -3.153551000 | -1.624330000 | -1.720611000 |
| H                                                                | -2.126405000 | -1.601579000 | 1.759599000  | H                                                                | -2.225326000 | -1.485808000 | -1.975138000 |
| H                                                                | -1.118894000 | -2.459679000 | 0.967848000  | H                                                                | -3.535821000 | -0.724122000 | -1.705138000 |
| O                                                                | -3.054789000 | -1.675699000 | -1.307182000 | O                                                                | -1.269856000 | 1.671166000  | -1.080013000 |
| H                                                                | -3.710892000 | -2.343812000 | -1.542558000 | H                                                                | -0.975454000 | 0.773333000  | -1.367114000 |
| H                                                                | -2.737686000 | -1.935072000 | -0.397162000 | H                                                                | -2.219119000 | 1.695732000  | -1.297774000 |
| O                                                                | -0.804425000 | 1.513277000  | -2.065866000 | O                                                                | -1.152334000 | 1.200888000  | 1.607600000  |
| H                                                                | -0.554988000 | 0.563932000  | -2.114597000 | H                                                                | -1.184782000 | 1.480126000  | 0.659566000  |
| H                                                                | -1.771793000 | 1.488513000  | -1.960687000 | H                                                                | -0.352219000 | 1.626454000  | 1.962408000  |
| O                                                                | 0.260797000  | 2.306533000  | 0.261628000  | O                                                                | -0.492887000 | -1.416210000 | 1.153618000  |
| H                                                                | -0.106980000 | 2.035696000  | -0.621427000 | H                                                                | -0.773357000 | -0.506041000 | 1.416136000  |
| H                                                                | 1.177430000  | 2.558214000  | 0.053152000  | H                                                                | -1.294939000 | -1.958525000 | 1.256586000  |
| O                                                                | 0.666815000  | 0.239156000  | 1.953391000  | O                                                                | -0.368009000 | -0.876030000 | -1.565234000 |
| H                                                                | 0.460319000  | 0.999958000  | 1.350794000  | H                                                                | -0.348022000 | -1.162971000 | -0.623458000 |
| H                                                                | -0.116638000 | 0.149847000  | 2.523904000  | H                                                                | 0.572023000  | -0.763532000 | -1.800255000 |
| O                                                                | 0.680053000  | -1.984249000 | 0.414174000  | O                                                                | 1.481950000  | 2.577621000  | -0.873672000 |
| H                                                                | 1.606254000  | -2.268320000 | 0.318815000  | H                                                                | 1.538667000  | 2.561343000  | 0.100232000  |
| H                                                                | 0.730707000  | -1.172810000 | 0.979536000  | H                                                                | 0.526718000  | 2.578194000  | -1.055430000 |
| O                                                                | -0.163655000 | -1.192324000 | -2.060259000 | O                                                                | 1.618310000  | 1.944864000  | 1.947402000  |
| H                                                                | -1.055672000 | -1.561483000 | -2.160581000 | H                                                                | 1.927308000  | 1.019833000  | 1.795093000  |
| H                                                                | 0.113119000  | -1.489082000 | -1.159606000 | H                                                                | 2.214273000  | 2.313227000  | 2.611347000  |
| O                                                                | 2.656215000  | -0.164101000 | -2.125074000 | O                                                                | 2.232333000  | -0.622570000 | 1.173226000  |
| H                                                                | 1.787227000  | -0.475376000 | -2.422327000 | H                                                                | 1.435820000  | -1.163640000 | 1.322111000  |
| H                                                                | 2.986784000  | -0.877817000 | -1.543088000 | H                                                                | 2.230914000  | -0.446428000 | 0.193140000  |
| O                                                                | 3.020493000  | 2.062202000  | -0.602783000 | O                                                                | 2.316263000  | 0.019495000  | -1.440168000 |
| H                                                                | 3.636599000  | 2.655836000  | -1.049738000 | H                                                                | 2.130992000  | 0.985255000  | -1.369791000 |
| H                                                                | 2.858992000  | 1.324800000  | -1.243482000 | H                                                                | 3.263424000  | -0.076714000 | -1.680294000 |
| O                                                                | 3.513104000  | 0.272492000  | 1.546426000  | O                                                                | 5.015207000  | -0.542836000 | -1.612541000 |
| H                                                                | 3.463649000  | 1.009560000  | 0.905017000  | H                                                                | 5.722421000  | 0.092783000  | -1.777002000 |
| H                                                                | 2.636923000  | 0.282765000  | 1.971426000  | H                                                                | 5.121564000  | -0.807497000 | -0.672585000 |
| O                                                                | 3.514132000  | -1.889960000 | -0.050642000 | O                                                                | 4.932900000  | -1.276128000 | 1.076379000  |
| H                                                                | 4.309945000  | -2.429052000 | 0.032756000  | H                                                                | 5.151428000  | -2.182862000 | 1.324641000  |
| H                                                                | 3.621998000  | -1.142845000 | 0.596236000  | H                                                                | 3.974159000  | -1.184860000 | 1.263816000  |

| <b>W<sub>14:5</sub></b><br><b>E(MP2/aTZ) = -1068.832599 a.u.</b> |              |              |              | <b>W<sub>15:1</sub></b><br><b>E(MP2/aTZ) = -1145.184657 a.u.</b> |              |              |              |
|------------------------------------------------------------------|--------------|--------------|--------------|------------------------------------------------------------------|--------------|--------------|--------------|
| O                                                                | -2.977240000 | 1.846339000  | -1.294001000 | O                                                                | -2.987031127 | 2.217087135  | 0.962544955  |
| H                                                                | -2.991583000 | 1.793784000  | -0.302731000 | H                                                                | -3.690642416 | 2.861357606  | 1.108041283  |
| H                                                                | -3.720765000 | 2.412484000  | -1.534825000 | H                                                                | -3.079825870 | 1.929772560  | 0.015283019  |
| O                                                                | -2.789629000 | 1.595325000  | 1.387712000  | O                                                                | -2.686949002 | -0.169654707 | 2.463812015  |
| H                                                                | -2.872859000 | 0.665558000  | 1.682293000  | H                                                                | -2.853181610 | 0.680461425  | 2.008549459  |
| H                                                                | -1.878877000 | 1.839132000  | 1.625224000  | H                                                                | -1.768485010 | -0.098458687 | 2.768654863  |
| O                                                                | -2.832365000 | -1.158986000 | 2.091773000  | O                                                                | -2.812107511 | -2.301698529 | 0.719704387  |
| H                                                                | -3.294506000 | -1.645855000 | 1.360981000  | H                                                                | -2.837050862 | -1.560583943 | 1.370514065  |
| H                                                                | -3.273310000 | -1.436913000 | 2.904052000  | H                                                                | -1.905315243 | -2.638144957 | 0.797833969  |
| O                                                                | -4.003877000 | -2.256057000 | -0.056497000 | O                                                                | -3.113157408 | -1.420561522 | -1.777112478 |
| H                                                                | -4.004620000 | -3.192621000 | -0.287534000 | H                                                                | -3.088373260 | -1.776878150 | -0.845989152 |
| H                                                                | -3.568147000 | -1.799660000 | -0.822342000 | H                                                                | -3.825564622 | -1.898544347 | -2.219233235 |
| O                                                                | -2.766551000 | -0.889203000 | -2.021283000 | O                                                                | -2.990464424 | 1.387314858  | -1.589891912 |
| H                                                                | -1.801064000 | -1.003477000 | -1.976663000 | H                                                                | -3.114274388 | 0.421126764  | -1.698678283 |
| H                                                                | -2.903570000 | 0.066826000  | -1.864982000 | H                                                                | -2.093902416 | 1.550984585  | -1.928364259 |
| O                                                                | 0.041614000  | -0.927223000 | -1.383376000 | O                                                                | -0.128347122 | 2.164952861  | 0.734836367  |
| H                                                                | 0.043328000  | -1.064905000 | -0.406848000 | H                                                                | -0.160467588 | 1.877566739  | -0.211319709 |
| H                                                                | 0.943116000  | -1.142012000 | -1.686643000 | H                                                                | -1.037585258 | 2.457956377  | 0.927573068  |
| O                                                                | -0.102752000 | 1.807782000  | -1.408408000 | O                                                                | 0.263221545  | 0.016785303  | 2.346024794  |
| H                                                                | -1.023487000 | 2.059798000  | -1.601393000 | H                                                                | 0.151873873  | 0.805631252  | 1.758949741  |
| H                                                                | -0.098394000 | 0.823907000  | -1.491181000 | H                                                                | 1.193773763  | 0.050784552  | 2.622704908  |
| O                                                                | 0.085975000  | 1.822228000  | 1.322061000  | O                                                                | 0.143749544  | -2.211210132 | 0.761701582  |
| H                                                                | 1.002555000  | 2.036047000  | 1.572609000  | H                                                                | 1.068508855  | -2.511115237 | 0.762201874  |
| H                                                                | 0.065561000  | 1.933350000  | 0.340805000  | H                                                                | 0.157068055  | -1.419951769 | 1.354089638  |
| O                                                                | -0.064271000 | -0.906619000 | 1.362961000  | O                                                                | -0.243576521 | -1.362354401 | -1.791328487 |
| H                                                                | -0.928606000 | -1.165456000 | 1.732314000  | H                                                                | -0.158080625 | -1.680592558 | -0.858109089 |
| H                                                                | -0.058280000 | 0.079468000  | 1.429093000  | H                                                                | -1.170187317 | -1.547022650 | -2.030460273 |
| O                                                                | 2.754825000  | -0.997760000 | 1.974958000  | O                                                                | -0.102729927 | 1.343746744  | -1.855508437 |
| H                                                                | 1.789893000  | -1.115567000 | 1.917504000  | H                                                                | -0.113465121 | 0.354368405  | -1.845649250 |
| H                                                                | 2.883217000  | -0.032159000 | 1.883482000  | H                                                                | 0.782088491  | 1.577311430  | -2.187203709 |
| O                                                                | 2.960275000  | 1.779937000  | 1.414377000  | O                                                                | 2.740171947  | 2.242613357  | 0.552961063  |
| H                                                                | 3.688716000  | 2.344851000  | 1.700103000  | H                                                                | 2.955440589  | 1.482923489  | 1.130557877  |
| H                                                                | 2.993618000  | 1.782006000  | 0.422071000  | H                                                                | 1.820785862  | 2.466224893  | 0.780535802  |
| O                                                                | 2.793480000  | 1.685741000  | -1.274120000 | O                                                                | 3.196249133  | -0.054736777 | 2.153729329  |
| H                                                                | 2.861594000  | 0.770725000  | -1.615734000 | H                                                                | 3.961365285  | -0.104357692 | 2.740014145  |
| H                                                                | 1.894573000  | 1.963605000  | -1.517953000 | H                                                                | 3.251809956  | -0.855075502 | 1.580978036  |
| O                                                                | 2.824859000  | -1.036369000 | -2.088735000 | O                                                                | 3.073163313  | -2.196336843 | 0.423696552  |
| H                                                                | 3.323962000  | -1.552679000 | -1.403689000 | H                                                                | 3.734681662  | -2.895211045 | 0.346630180  |
| H                                                                | 3.221531000  | -1.281276000 | -2.933884000 | H                                                                | 2.958062302  | -1.843783339 | -0.502106047 |
| O                                                                | 4.070042000  | -2.215049000 | -0.030828000 | O                                                                | 2.619502430  | -1.228430227 | -2.022629857 |
| H                                                                | 3.605490000  | -1.820314000 | 0.752504000  | H                                                                | 2.741401046  | -0.259143612 | -2.097655173 |
| H                                                                | 4.115759000  | -3.161276000 | 0.150897000  | H                                                                | 1.678693515  | -1.372213080 | -2.225649640 |
|                                                                  |              |              |              | O                                                                | 2.763175921  | 1.579042408  | -2.049414338 |
|                                                                  |              |              |              | H                                                                | 3.417910407  | 2.104618686  | -2.525079845 |
|                                                                  |              |              |              | H                                                                | 2.827007358  | 1.864597002  | -1.099287466 |

| <b>W<sub>15:2</sub></b><br><b>E(MP2/aTZ) = -1145.18208 a.u.</b> |              |              |              | <b>W<sub>15:3</sub></b><br><b>E(MP2/aTZ) = -1145.181424 a.u.</b> |              |              |              |
|-----------------------------------------------------------------|--------------|--------------|--------------|------------------------------------------------------------------|--------------|--------------|--------------|
| O                                                               | 4.731408026  | 1.516454339  | -0.350840084 | O                                                                | 3.400805764  | 1.312968818  | 1.341342208  |
| H                                                               | 4.206173974  | 1.041702977  | -1.046004534 | H                                                                | 4.211386759  | 1.695486130  | 1.699303529  |
| H                                                               | 4.960121435  | 2.367670909  | -0.742742497 | H                                                                | 3.537903154  | 1.272947744  | 0.366564798  |
| O                                                               | 3.213275985  | 0.135344731  | -2.095215518 | O                                                                | 3.494357006  | 1.097186860  | -1.413217703 |
| H                                                               | 2.292636600  | 0.450183408  | -2.096805858 | H                                                                | 3.195568564  | 0.186611946  | -1.686972299 |
| H                                                               | 3.144546416  | -0.790741494 | -1.786111226 | H                                                                | 4.254805215  | 1.294669063  | -1.974061778 |
| O                                                               | 2.830536962  | -2.420176562 | -0.929946862 | O                                                                | 2.542542590  | -1.301176446 | -2.095832958 |
| H                                                               | 3.431137150  | -3.167730025 | -1.039065361 | H                                                                | 2.536685873  | -1.918083500 | -1.335043090 |
| H                                                               | 2.860245004  | -2.192920503 | 0.036583611  | H                                                                | 1.609970598  | -1.217609264 | -2.357935471 |
| O                                                               | 2.682779572  | -1.662505227 | 1.649775062  | O                                                                | 2.382900000  | -2.878235012 | 0.222352335  |
| H                                                               | 1.741485244  | -1.679119206 | 1.893821854  | H                                                                | 2.453291152  | -2.286572385 | 1.018312798  |
| H                                                               | 2.944764049  | -0.728625850 | 1.783696911  | H                                                                | 2.893417461  | -3.669296743 | 0.432934705  |
| O                                                               | 3.266676857  | 1.107152275  | 1.858994976  | O                                                                | 2.395383428  | -1.154383634 | 2.277923785  |
| H                                                               | 3.710413041  | 1.445842124  | 2.646362772  | H                                                                | 2.788794861  | -0.299428586 | 2.009529877  |
| H                                                               | 3.858017519  | 1.348103680  | 1.099913252  | H                                                                | 1.476914556  | -0.937960626 | 2.513795888  |
| O                                                               | 0.503264378  | 1.386487257  | 1.041953318  | O                                                                | 0.523332715  | 1.950121232  | 1.279677450  |
| H                                                               | 1.419217601  | 1.478265688  | 1.362681457  | H                                                                | 0.160724449  | 1.082694280  | 1.591653572  |
| H                                                               | 0.579702875  | 1.190608627  | 0.068522622  | H                                                                | 1.451105345  | 1.953630460  | 1.565711049  |
| O                                                               | 0.430864863  | 0.715970214  | -1.554611979 | O                                                                | 0.692165603  | 1.960568925  | -1.467138505 |
| H                                                               | -0.371628933 | 1.190904893  | -1.866795309 | H                                                                | 1.645421982  | 1.903214066  | -1.651715345 |
| H                                                               | 0.166558427  | -0.229604115 | -1.476596314 | H                                                                | 0.652000338  | 1.933740893  | -0.482962417 |
| O                                                               | -0.019408058 | -1.936376782 | -0.957614935 | O                                                                | -0.270245872 | -0.485613469 | -2.179722235 |
| H                                                               | -0.022627603 | -1.770322632 | 0.015670167  | H                                                                | -1.222116456 | -0.431842074 | -2.386260358 |
| H                                                               | 0.844625072  | -2.352985793 | -1.126351680 | H                                                                | 0.001098063  | 0.437378137  | -1.950978423 |
| O                                                               | -0.168694075 | -1.212125030 | 1.680527637  | O                                                                | -0.363483772 | -2.163461449 | -0.053197934 |
| H                                                               | -1.098505000 | -1.344865309 | 1.946698642  | H                                                                | -0.281689527 | -1.567233222 | -0.839427402 |
| H                                                               | -0.052307316 | -0.240646476 | 1.573597296  | H                                                                | 0.475192676  | -2.656553918 | -0.012263968 |
| O                                                               | -2.977516009 | -1.542428159 | 1.882602657  | O                                                                | -0.423234489 | -0.460827153 | 2.070145179  |
| H                                                               | -3.524002068 | -1.906552806 | 2.589682576  | H                                                                | -1.364566193 | -0.381642922 | 2.315297804  |
| H                                                               | -3.342688401 | -0.634840405 | 1.699840942  | H                                                                | -0.430866111 | -1.083439147 | 1.302669584  |
| O                                                               | -2.872589959 | -2.197277880 | -0.900093203 | O                                                                | -1.541224341 | 3.530199656  | 0.009697955  |
| H                                                               | -2.919722671 | -2.169649829 | 0.075560676  | H                                                                | -1.072629810 | 3.547251008  | -0.837710168 |
| H                                                               | -1.921174815 | -2.283477588 | -1.091172018 | H                                                                | -0.861803422 | 3.206634582  | 0.626956241  |
| O                                                               | -3.979034567 | 0.140267801  | -1.604514208 | O                                                                | -3.492487226 | 1.505051393  | 0.053538234  |
| H                                                               | -3.580928810 | -0.756624944 | -1.443040583 | H                                                                | -2.848728105 | 2.241674831  | -0.003854200 |
| H                                                               | -4.728637921 | -0.009162615 | -2.193561167 | H                                                                | -3.384223421 | 0.994081295  | -0.770891473 |
| O                                                               | -3.869248999 | 0.863647886  | 1.127410064  | O                                                                | -3.139167272 | -0.431547641 | -2.041110140 |
| H                                                               | -3.207532030 | 1.581031237  | 1.139258171  | H                                                                | -3.822599995 | -0.606858915 | -2.700037368 |
| H                                                               | -4.062626894 | 0.727289275  | 0.178707027  | H                                                                | -3.240480001 | -1.147649550 | -1.358431988 |
| O                                                               | -1.823734343 | 2.845465767  | 0.889945399  | O                                                                | -3.202414774 | -2.212418133 | -0.020744508 |
| H                                                               | -0.934106891 | 2.476866571  | 1.082900617  | H                                                                | -2.270010388 | -2.488685450 | 0.036313339  |
| H                                                               | -1.838135910 | 3.719597581  | 1.298751245  | H                                                                | -3.331758814 | -1.670674759 | 0.783641909  |
| O                                                               | -1.941445490 | 2.111202450  | -1.968337135 | O                                                                | -3.273043283 | -0.255123304 | 2.039657375  |
| H                                                               | -2.676958468 | 1.468965270  | -1.965037734 | H                                                                | -3.384557414 | 0.472593671  | 1.367194930  |
| H                                                               | -1.995609089 | 2.529716591  | -1.091860927 | H                                                                | -3.968358435 | -0.113567620 | 2.693745654  |

| <b>W<sub>15:4</sub></b><br><b>E(MP2/aTZ) = -1145.181114 a.u.</b> |              |              |              | <b>W<sub>15:5</sub></b><br><b>E(MP2/aTZ) = -1145.17937 a.u.</b> |              |              |              |
|------------------------------------------------------------------|--------------|--------------|--------------|-----------------------------------------------------------------|--------------|--------------|--------------|
| O                                                                | -3.870277015 | 0.218524919  | -1.469626879 | O                                                               | -2.869460038 | 2.181531829  | 0.257075755  |
| H                                                                | -3.905662087 | 0.457541121  | -0.502121485 | H                                                               | -1.967428902 | 2.530666837  | 0.145782447  |
| H                                                                | -4.694085998 | 0.541497329  | -1.854726932 | H                                                               | -3.031168755 | 1.666075174  | -0.558714610 |
| O                                                                | -3.657099424 | 0.708114692  | 1.146045060  | O                                                               | -2.728052895 | 0.656666044  | 2.462025811  |
| H                                                                | -2.894411337 | 1.299944042  | 1.292667203  | H                                                               | -3.378004242 | 0.949018015  | 3.112755424  |
| H                                                                | -3.389479037 | -0.148535511 | 1.532861475  | H                                                               | -2.858109650 | 1.244898784  | 1.670942241  |
| O                                                                | -2.785277841 | -1.946557124 | 1.733317509  | O                                                               | -2.559810714 | -1.954833637 | 1.430353420  |
| H                                                                | -2.895881531 | -2.220278302 | 0.785054723  | H                                                               | -1.615786895 | -2.146803010 | 1.573492573  |
| H                                                                | -3.268729356 | -2.602782506 | 2.250647947  | H                                                               | -2.694118834 | -1.078059294 | 1.846414734  |
| O                                                                | -2.926763957 | -2.396538328 | -0.923688377 | O                                                               | -2.959673740 | -2.009442056 | -1.208477050 |
| H                                                                | -3.341899492 | -1.582052882 | -1.271152596 | H                                                               | -2.864904532 | -1.997899809 | -0.215370247 |
| H                                                                | -2.017321049 | -2.359792159 | -1.266881325 | H                                                               | -3.605176328 | -2.703857971 | -1.390466334 |
| O                                                                | -1.167654677 | 1.008372644  | -1.444765459 | O                                                               | -3.155225001 | 0.598097371  | -2.084693367 |
| H                                                                | -1.262571948 | 1.402703589  | -0.547993132 | H                                                               | -3.177403148 | -0.353536720 | -1.828524481 |
| H                                                                | -2.091180602 | 0.855079653  | -1.724668530 | H                                                               | -3.915386350 | 0.724148811  | -2.666031030 |
| O                                                                | -1.245134787 | 2.207917800  | 1.094527394  | O                                                               | -0.022747026 | 2.412311304  | 0.127921174  |
| H                                                                | -0.963829638 | 3.114828878  | 0.850360545  | H                                                               | 0.117032215  | 1.789972672  | 0.880564606  |
| H                                                                | -0.443187414 | 1.829569039  | 1.504112877  | H                                                               | 0.818047014  | 2.899956827  | 0.017596094  |
| O                                                                | 0.064888224  | 4.375841214  | -0.035714636 | O                                                               | 0.154560533  | 0.590518782  | 2.155167802  |
| H                                                                | 0.581305181  | 5.115606175  | 0.305800303  | H                                                               | -0.727960689 | 0.682192537  | 2.555848981  |
| H                                                                | 0.717168626  | 3.751757850  | -0.418497814 | H                                                               | 0.175775047  | -0.339029596 | 1.821528180  |
| O                                                                | 1.417931559  | 2.098915363  | -0.988109640 | O                                                               | 0.285643529  | -1.972721665 | 1.214423520  |
| H                                                                | 0.664256374  | 1.824352053  | -1.541214261 | H                                                               | 1.185691697  | -2.292261045 | 1.404128860  |
| H                                                                | 1.279576866  | 1.590072621  | -0.153997256 | H                                                               | 0.229055939  | -1.950306731 | 0.226799615  |
| O                                                                | 1.140668629  | 0.799738229  | 1.451695163  | O                                                               | -0.021750329 | -1.842492298 | -1.477938818 |
| H                                                                | 0.749560509  | -0.108043427 | 1.467688466  | H                                                               | -0.934987962 | -2.149017594 | -1.609445491 |
| H                                                                | 2.073454396  | 0.672359113  | 1.712060294  | H                                                               | -0.072127753 | -0.877247242 | -1.684985114 |
| O                                                                | 0.059324144  | -1.690811092 | 1.311972385  | O                                                               | -0.214436044 | 0.824583001  | -2.038282763 |
| H                                                                | -0.825660211 | -1.848929026 | 1.689010221  | H                                                               | -1.109284431 | 0.929434171  | -2.399587368 |
| H                                                                | -0.085740975 | -1.714064489 | 0.333832134  | H                                                               | -0.196558998 | 1.417496610  | -1.243792857 |
| O                                                                | -0.192878248 | -1.553478736 | -1.386441718 | O                                                               | 2.564483044  | 3.409988944  | -0.514270623 |
| H                                                                | 0.714517009  | -1.660426804 | -1.728444297 | H                                                               | 2.902610479  | 2.574335969  | -0.885561988 |
| H                                                                | -0.431384094 | -0.602245436 | -1.483519094 | H                                                               | 3.219459800  | 3.659846841  | 0.150060486  |
| O                                                                | 3.808829279  | 0.570620638  | -1.174198403 | O                                                               | 2.645487741  | 0.739592126  | -1.471289769 |
| H                                                                | 3.056764679  | 1.182680735  | -1.302661159 | H                                                               | 1.806644783  | 0.840817372  | -1.950346396 |
| H                                                                | 3.487088761  | -0.274896086 | -1.544164404 | H                                                               | 2.874234012  | -0.211958491 | -1.601831127 |
| O                                                                | 3.860532170  | 0.085155565  | 1.454276303  | O                                                               | 2.949284783  | 0.517446168  | 1.333307034  |
| H                                                                | 4.687720122  | 0.347274051  | 1.876361807  | H                                                               | 2.146690506  | 0.756169224  | 1.825586414  |
| H                                                                | 3.956283617  | 0.317599727  | 0.488883088  | H                                                               | 2.722480493  | 0.687059009  | 0.394465963  |
| O                                                                | 2.796336860  | -2.487979505 | 0.904206622  | O                                                               | 3.153389562  | -2.177013261 | 1.282995136  |
| H                                                                | 3.245137184  | -1.692869653 | 1.254043912  | H                                                               | 3.185163176  | -1.193666034 | 1.407355532  |
| H                                                                | 1.894787521  | -2.434181329 | 1.267232345  | H                                                               | 3.875409621  | -2.535811034 | 1.813207266  |
| O                                                                | 2.627322172  | -1.967248844 | -1.738106461 | O                                                               | 2.933783742  | -1.997464976 | -1.553568303 |
| H                                                                | 3.009791833  | -2.672193362 | -2.275758185 | H                                                               | 2.012058429  | -2.268481212 | -1.696607599 |
| H                                                                | 2.723636518  | -2.268662519 | -0.796274995 | H                                                               | 3.100492501  | -2.222342864 | -0.616920143 |

| <b>W<sub>16:1</sub></b><br><b>E(MP2/aTZ) = -1221.5337 a.u.</b> |              |              |              | <b>W<sub>16:2</sub></b><br><b>E(MP2/aTZ) = -1221.534288 a.u.</b> |              |              |              |
|----------------------------------------------------------------|--------------|--------------|--------------|------------------------------------------------------------------|--------------|--------------|--------------|
| O                                                              | 2.745302659  | -2.191068115 | -1.321176480 | O                                                                | 2.921921226  | 2.348546946  | 1.390834034  |
| H                                                              | 1.796161788  | -2.035604901 | -1.473654937 | H                                                                | 3.306742467  | 3.177886575  | 1.699979248  |
| H                                                              | 2.809075718  | -2.376922995 | -0.362195752 | H                                                                | 2.896655728  | 2.416006116  | 0.400172847  |
| O                                                              | 4.181957391  | 0.047846306  | -1.590139619 | O                                                                | 4.263255201  | -0.154906089 | 1.269187969  |
| H                                                              | 3.667282037  | -0.804403737 | -1.584540903 | H                                                                | 3.850576278  | 0.709185620  | 1.467499104  |
| H                                                              | 4.870246723  | -0.067324107 | -2.256731863 | H                                                                | 4.439882311  | -0.113195021 | 0.310219140  |
| O                                                              | 2.544168363  | 2.326316462  | -1.326567595 | O                                                                | 2.715975980  | -2.326674426 | 1.458453847  |
| H                                                              | 1.634315386  | 2.077415097  | -1.567082293 | H                                                                | 3.108547438  | -2.965763800 | 2.065582525  |
| H                                                              | 3.091290413  | 1.549568059  | -1.561422437 | H                                                                | 3.306945000  | -1.526379499 | 1.492685288  |
| O                                                              | -0.190290086 | 1.371167119  | -1.348398845 | O                                                                | 0.030811160  | -1.341327153 | 1.389240176  |
| H                                                              | -1.059494554 | 1.745877087  | -1.582578881 | H                                                                | 0.906951137  | -1.722695260 | 1.586178689  |
| H                                                              | -0.125706376 | -0.404052358 | -1.527491920 | H                                                                | 0.130708506  | -0.369869845 | 1.523219590  |
| O                                                              | -0.007070865 | -1.371832931 | -1.382215669 | O                                                                | 0.179516965  | 1.404161508  | 1.325050435  |
| H                                                              | 0.158297282  | -1.434880007 | 0.362566966  | H                                                                | 0.164560722  | 1.448592830  | 0.337286633  |
| H                                                              | -0.868189394 | -1.780354777 | -1.586325178 | H                                                                | 1.029736628  | 1.813416370  | 1.567673703  |
| O                                                              | -2.666739946 | -2.470647780 | -1.357540130 | O                                                                | -2.557819927 | 2.338800138  | 1.275097181  |
| H                                                              | -2.641741278 | -2.539258154 | -0.366705924 | H                                                                | -1.645801360 | 2.097536198  | 1.516118510  |
| H                                                              | -2.972667643 | -3.330125593 | -1.672583774 | H                                                                | -3.100529312 | 1.565463777  | 1.530395707  |
| O                                                              | -4.262915224 | -0.120086026 | -1.275632332 | O                                                                | -4.174447179 | 0.053807010  | 1.602708117  |
| H                                                              | -3.761436850 | -0.938585315 | -1.461653132 | H                                                                | -4.858934036 | -0.052311357 | 2.274701603  |
| H                                                              | -4.435612596 | -0.169954503 | -0.316344756 | H                                                                | -3.651780867 | -0.793308797 | 1.614983267  |
| O                                                              | -2.939944978 | 2.196762633  | -1.497659875 | O                                                                | -2.721870071 | -2.181313217 | 1.380168354  |
| H                                                              | -3.449456143 | 1.342788443  | -1.524769198 | H                                                                | -1.771468482 | -2.022985570 | 1.520032466  |
| H                                                              | -3.404325445 | 2.797513692  | -2.093016775 | H                                                                | -2.795478600 | -2.391864251 | 0.426959432  |
| O                                                              | -2.745276255 | 2.191077542  | 1.321180402  | O                                                                | -2.955336303 | -2.259346581 | -1.433622689 |
| H                                                              | -1.796134910 | 2.035587354  | 1.473650735  | H                                                                | -3.423964691 | -2.875499715 | -2.009571505 |
| H                                                              | -2.809053078 | 2.376935495  | 0.362199934  | H                                                                | -3.464061594 | -1.405820973 | -1.480131949 |
| O                                                              | -4.181945327 | -0.047818200 | 1.590159514  | O                                                                | -4.270363074 | 0.066519964  | -1.263842273 |
| H                                                              | -4.870226987 | 0.067360436  | 2.256761740  | H                                                                | -3.766966131 | 0.878458325  | -1.471963027 |
| H                                                              | -3.667271929 | 0.804428388  | 1.584557120  | H                                                                | -4.436760674 | 0.138392439  | -0.304860182 |
| O                                                              | -2.544189848 | -2.326307540 | 1.326564383  | O                                                                | -2.674169979 | 2.418188850  | -1.411712367 |
| H                                                              | -1.634326221 | -2.077426595 | 1.567079134  | H                                                                | -2.653802031 | 2.510093818  | -0.422577323 |
| H                                                              | -3.091300071 | -1.549549734 | 1.561426403  | H                                                                | -2.991331486 | 3.265796003  | -1.747294115 |
| O                                                              | 0.190292087  | -1.371223570 | 1.348385552  | O                                                                | -0.003425075 | 1.340037015  | -1.405326435 |
| H                                                              | 0.125710274  | 0.404000359  | 1.527471748  | H                                                                | -0.129286679 | 0.371366975  | -1.535979008 |
| H                                                              | 1.059498393  | -1.745918069 | 1.582565646  | H                                                                | -0.862675027 | 1.747180166  | -1.620115922 |
| O                                                              | 0.007067950  | 1.371782744  | 1.382203276  | O                                                                | -0.214215361 | -1.402738077 | -1.326082668 |
| H                                                              | -0.158296117 | 1.434822928  | -0.362585053 | H                                                                | -1.080731081 | -1.791284677 | -1.546645540 |
| H                                                              | 0.868186224  | 1.780306574  | 1.586310550  | H                                                                | -0.177254797 | -1.437736801 | -0.338388194 |
| O                                                              | 2.666705788  | 2.470662579  | 1.357534668  | O                                                                | 2.530867370  | -2.302275121 | -1.362469291 |
| H                                                              | 2.972598173  | 3.330154706  | 1.672581764  | H                                                                | 1.589372077  | -2.116913852 | -1.529181146 |
| H                                                              | 2.641710072  | 2.539275974  | 0.366700169  | H                                                                | 2.570331167  | -2.497517083 | -0.404135194 |
| O                                                              | 4.262898441  | 0.120119374  | 1.275655968  | O                                                                | 4.182513676  | -0.210521948 | -1.595589524 |
| H                                                              | 3.761414630  | 0.938610389  | 1.461667677  | H                                                                | 3.577217537  | -1.000470592 | -1.605235918 |
| H                                                              | 4.435601767  | 0.169988770  | 0.316367112  | H                                                                | 4.858127954  | -0.392202496 | -2.260287885 |
| O                                                              | 2.939955899  | -2.196756481 | 1.497663210  | O                                                                | 2.752179074  | 2.197320510  | -1.290285362 |
| H                                                              | 3.449459680  | -1.342768041 | 1.524780725  | H                                                                | 1.828154680  | 1.988756961  | -1.514359924 |
| H                                                              | 3.404356238  | -2.797502128 | 2.093020060  | H                                                                | 3.251169938  | 1.391633210  | -1.534626574 |



| <b>W<sub>16:3</sub></b><br><b>E(MP2/aTZ) = -1221.533337 a.u.</b> |              |              |              | <b>W<sub>16:4</sub></b><br><b>E(MP2/aTZ) = -1221.534052 a.u.</b> |              |              |              |
|------------------------------------------------------------------|--------------|--------------|--------------|------------------------------------------------------------------|--------------|--------------|--------------|
| O                                                                | -2.687493771 | 2.164337437  | 1.614649119  | O                                                                | -4.392588685 | -1.479562176 | 1.352418463  |
| H                                                                | -2.767293690 | 1.351803737  | 2.143059082  | H                                                                | -5.080868111 | -2.074007943 | 1.674963443  |
| H                                                                | -3.254708609 | 1.992961285  | 0.838956463  | H                                                                | -4.425288730 | -1.536760503 | 0.360921646  |
| O                                                                | -4.240898215 | 1.331835896  | -0.648856936 | O                                                                | -4.265413164 | -1.360445996 | -1.335081202 |
| H                                                                | -4.977317375 | 1.835433414  | -1.016662133 | H                                                                | -4.390650311 | -0.408170155 | -1.518329314 |
| H                                                                | -3.671231938 | 1.082410992  | -1.424627850 | H                                                                | -3.339662360 | -1.532376037 | -1.582452478 |
| O                                                                | -2.659066323 | 0.404785008  | -2.608010033 | O                                                                | -4.392542175 | 1.479628541  | -1.352473045 |
| H                                                                | -1.722261446 | 0.647416188  | -2.490839444 | H                                                                | -4.425267093 | 1.536820798  | -0.360970745 |
| H                                                                | -2.677959976 | -0.559026167 | -2.448189899 | H                                                                | -5.080790213 | 2.074103101  | -1.675028816 |
| O                                                                | 0.034666412  | 0.811092191  | -1.747347676 | O                                                                | -4.265401263 | 1.360498873  | 1.335021848  |
| H                                                                | -0.035780876 | 1.259012702  | -0.873116937 | H                                                                | -4.390666513 | 0.408225790  | 1.518269963  |
| H                                                                | 0.912338226  | 1.098798917  | -2.083874501 | H                                                                | -3.339672196 | 1.532414919  | 1.582435390  |
| O                                                                | -0.024223161 | 1.770841181  | 0.842025250  | O                                                                | -1.529032082 | -1.354966817 | 1.404130062  |
| H                                                                | -0.920255344 | 2.072321655  | 1.109028632  | H                                                                | -2.457892905 | -1.572460991 | 1.605592088  |
| H                                                                | 0.059487225  | 0.884315008  | 1.262966376  | H                                                                | -1.482867464 | -0.375894844 | 1.499936539  |
| O                                                                | 0.058984595  | -0.833862537 | 1.747280878  | O                                                                | -1.390092594 | -1.411155103 | -1.326135046 |
| H                                                                | 0.933973527  | -1.115036757 | 2.075910729  | H                                                                | -0.519467760 | -1.730405567 | -1.612248306 |
| H                                                                | -0.023046017 | -1.253811202 | 0.852746685  | H                                                                | -1.380590658 | -1.494490897 | -0.340829715 |
| O                                                                | 2.780768509  | -1.550560624 | 2.199601527  | O                                                                | -1.529011758 | 1.354925495  | -1.404055784 |
| H                                                                | 3.303412860  | -0.752031769 | 1.920084150  | H                                                                | -1.482857408 | 0.375852966  | -1.499852114 |
| H                                                                | 3.230651901  | -1.899559109 | 2.978592870  | H                                                                | -2.457856411 | 1.572445468  | -1.605547960 |
| O                                                                | 4.128348405  | 0.525245629  | 1.170592491  | O                                                                | -1.390082190 | 1.411112700  | 1.326212428  |
| H                                                                | 4.334773742  | 0.206824324  | 0.269326819  | H                                                                | -0.519460659 | 1.730389802  | 1.612342360  |
| H                                                                | 3.617893452  | 1.343928257  | 1.024133495  | H                                                                | -1.380572110 | 1.494459434  | 0.340906992  |
| O                                                                | 2.518528108  | 2.794215021  | 0.487646336  | O                                                                | 1.390094766  | -1.411131417 | 1.326217546  |
| H                                                                | 1.581821932  | 2.600872965  | 0.705141044  | H                                                                | 1.380589256  | -1.494487819 | 0.340912631  |
| H                                                                | 2.685704736  | 3.681527443  | 0.828752996  | H                                                                | 0.519481989  | -1.730425563 | 1.612351389  |
| O                                                                | 2.652704248  | 1.646544470  | -2.235018162 | O                                                                | 1.529006911  | -1.354953887 | -1.404060234 |
| H                                                                | 3.227753176  | 0.875076571  | -2.068318527 | H                                                                | 2.457846587  | -1.572464173 | -1.605552664 |
| H                                                                | 2.749198665  | 2.184218606  | -1.430504943 | H                                                                | 1.482837817  | -0.375884801 | -1.499848030 |
| O                                                                | 4.212625225  | -0.609403432 | -1.416708539 | O                                                                | 1.390073371  | 1.411126590  | -1.326129553 |
| H                                                                | 4.940668714  | -0.986059437 | -1.925930712 | H                                                                | 0.519439712  | 1.730368375  | -1.612244334 |
| H                                                                | 3.638957341  | -1.379697750 | -1.156916237 | H                                                                | 1.380577681  | 1.494455641  | -0.340832327 |
| O                                                                | 2.635381860  | -2.555497241 | -0.466205794 | O                                                                | 1.529043093  | 1.354936639  | 1.404128674  |
| H                                                                | 1.691962005  | -2.435929641 | -0.683625649 | H                                                                | 2.457899763  | 1.572449459  | 1.605584238  |
| H                                                                | 2.678804772  | -2.403218369 | 0.498003631  | H                                                                | 1.482878942  | 0.375867511  | 1.499929604  |
| O                                                                | -0.067174301 | -1.722139911 | -0.802289363 | O                                                                | 4.265432403  | -1.360465065 | 1.335004770  |
| H                                                                | 0.000070254  | -0.839622379 | -1.249048582 | H                                                                | 3.339700619  | -1.532395306 | 1.582418312  |
| H                                                                | -0.920724560 | -2.088348530 | -1.103347169 | H                                                                | 4.390680084  | -0.408189161 | 1.518242336  |
| O                                                                | -2.741002916 | -2.259503849 | -1.586734367 | O                                                                | 4.392544093  | -1.479596451 | -1.352502532 |
| H                                                                | -3.273622604 | -1.986857981 | -0.791481314 | H                                                                | 4.425279656  | -1.536783635 | -0.361000308 |
| H                                                                | -3.172353699 | -3.049416498 | -1.934438042 | H                                                                | 5.080802504  | -2.074057046 | -1.675060630 |
| O                                                                | -4.107528244 | -1.255427156 | 0.482864356  | O                                                                | 4.265381667  | 1.360478636  | -1.335102953 |
| H                                                                | -3.592982845 | -1.103005113 | 1.298331193  | H                                                                | 3.339637189  | 1.532389203  | -1.582471591 |
| H                                                                | -4.331815107 | -0.357010186 | 0.168720550  | H                                                                | 4.390631090  | 0.408201899  | -1.518361740 |
| O                                                                | -2.498603745 | -0.557441947 | 2.741045008  | O                                                                | 4.392586675  | 1.479595179  | 1.352387922  |
| H                                                                | -1.553836870 | -0.744120292 | 2.549703930  | H                                                                | 5.080855862  | 2.074064080  | 1.674924349  |
| H                                                                | -2.656193603 | -0.900759148 | 3.629240755  | H                                                                | 4.425278961  | 1.536798729  | 0.360883849  |

| <b>W<sub>16:5</sub></b><br><b>E(MP2/aTZ) = -1221.533868 a.u.</b> |              |              |              | <b>W<sub>18:1</sub></b><br><b>E(MP2/aTZ) = -1374.2301304 a.u.</b> |              |              |              |
|------------------------------------------------------------------|--------------|--------------|--------------|-------------------------------------------------------------------|--------------|--------------|--------------|
| O                                                                | -4.264845026 | 1.073209335  | -1.568198096 | O                                                                 | 4.853990097  | 0.506247249  | 1.396954140  |
| H                                                                | -3.339181329 | 1.288298398  | -1.779597845 | H                                                                 | 4.003091501  | 0.900667142  | 1.657342790  |
| H                                                                | -4.390648756 | 1.426131527  | -0.664913313 | H                                                                 | 4.729682134  | -0.452027922 | 1.547782239  |
| O                                                                | -4.404899828 | 1.592060628  | 1.225807732  | O                                                                 | 4.990785715  | 0.671077389  | -1.290580160 |
| H                                                                | -5.090450460 | 2.011045927  | 1.760308937  | H                                                                 | 5.042800468  | 0.689637712  | -0.298948241 |
| H                                                                | -4.441084371 | 0.623905175  | 1.447463373  | H                                                                 | 5.801530937  | 1.088603159  | -1.605974573 |
| O                                                                | -4.264774516 | -1.071995923 | 1.569392568  | O                                                                 | 4.137475890  | -2.033607745 | -1.356611602 |
| H                                                                | -4.390912888 | -1.424879204 | 0.666144069  | H                                                                 | 4.513061964  | -1.144269033 | -1.512476038 |
| H                                                                | -3.339095851 | -1.287335037 | 1.780515863  | H                                                                 | 3.199748676  | -1.941045802 | -1.602424983 |
| O                                                                | -4.405665927 | -1.590803360 | -1.224572715 | O                                                                 | 4.226544917  | -2.260162001 | 1.324791228  |
| H                                                                | -4.441623377 | -0.622633538 | -1.446211353 | H                                                                 | 4.242211453  | -2.294537008 | 0.331579504  |
| H                                                                | -5.091486445 | -2.009588974 | -1.758884583 | H                                                                 | 4.726275609  | -3.029287882 | 1.624463285  |
| O                                                                | -1.385268880 | 1.194347254  | -1.523170896 | O                                                                 | 2.073587067  | 1.274959952  | 1.413909372  |
| H                                                                | -1.372617443 | 1.424812737  | -0.561295928 | H                                                                 | 2.107451711  | 1.372702247  | 0.436995392  |
| H                                                                | -0.519137983 | 1.475361903  | -1.858376577 | H                                                                 | 1.385195878  | 1.921868736  | 1.681110800  |
| O                                                                | -1.532464915 | 1.552101932  | 1.176575115  | O                                                                 | 2.177730303  | 1.304151386  | -1.379748140 |
| H                                                                | -1.485646127 | 0.599377215  | 1.422478737  | H                                                                 | 1.845058756  | 0.381392732  | 1.324165409  |
| H                                                                | -2.459427190 | 1.796793432  | 1.353936341  | H                                                                 | 3.134607803  | 1.250534763  | -1.555638493 |
| O                                                                | -1.385257624 | -1.193948399 | 1.523415178  | O                                                                 | 1.359143249  | -1.294780032 | -1.353670063 |
| H                                                                | -0.519111915 | -1.475164584 | 1.858404367  | H                                                                 | 0.445541237  | -1.471647619 | -1.636677701 |
| H                                                                | -1.372896465 | -1.424423552 | 0.561536248  | H                                                                 | 1.343500986  | -1.404837523 | -0.370159042 |
| O                                                                | -1.533182467 | -1.551695250 | -1.176283246 | O                                                                 | 1.492974491  | -1.390236978 | 1.373195810  |
| H                                                                | -1.486142064 | -0.598976168 | -1.422192184 | H                                                                 | 1.669001027  | -0.430697130 | 1.531597743  |
| H                                                                | -2.460282882 | -1.796093181 | -1.353382984 | H                                                                 | 2.336319707  | -1.833045772 | 1.579714787  |
| O                                                                | 1.534685639  | 1.135608032  | -1.589009155 | O                                                                 | -0.061991318 | 3.080666574  | 1.636779866  |
| H                                                                | 1.485256790  | 0.153340021  | -1.540080294 | H                                                                 | -0.061589848 | 3.320977145  | 0.693760352  |
| H                                                                | 2.464709662  | 1.318409991  | -1.817886175 | H                                                                 | -0.867071318 | 2.543337108  | 1.740136321  |
| O                                                                | 1.390985637  | 1.589639804  | 1.103135417  | O                                                                 | 0.191914883  | 3.242464926  | -1.314738970 |
| H                                                                | 1.382991720  | 1.527931877  | 0.116150759  | H                                                                 | 0.966255374  | 2.661674151  | -1.470689706 |
| H                                                                | 0.520801115  | 1.949224180  | 1.337987885  | H                                                                 | 0.331796949  | 4.013814851  | -1.877860866 |
| O                                                                | 1.534629014  | -1.135994453 | 1.588464513  | O                                                                 | -2.225733163 | 1.156233693  | 1.492899096  |
| H                                                                | 1.485491089  | -0.153719633 | 1.539534191  | H                                                                 | -3.178363697 | 1.087764114  | 1.688464821  |
| H                                                                | 2.464642647  | -1.319074439 | 1.817214096  | H                                                                 | -1.891177089 | 0.231368710  | 1.553551454  |
| O                                                                | 1.390348468  | -1.590016837 | -1.103664089 | O                                                                 | -2.057054370 | 1.440416889  | -1.220414072 |
| H                                                                | 1.382554099  | -1.528301747 | -0.116684702 | H                                                                 | -2.100381026 | 1.428965573  | -0.233172522 |
| H                                                                | 0.520034156  | -1.949388823 | -1.338343163 | H                                                                 | -1.383688105 | 2.113120846  | -1.427372337 |
| O                                                                | 4.397146243  | 1.264352066  | -1.553983584 | O                                                                 | -1.509038271 | -1.237236194 | -1.492884998 |
| H                                                                | 4.428967767  | 1.466551067  | -0.581602018 | H                                                                 | -1.676358053 | -0.266704811 | -1.535651175 |
| H                                                                | 5.084854799  | 1.805942793  | -1.960010639 | H                                                                 | -2.359244344 | -1.646623677 | -1.736730554 |
| O                                                                | 4.266808641  | 1.541296552  | 1.121504449  | O                                                                 | -1.385577269 | -1.453753661 | 1.247858009  |
| H                                                                | 3.340693538  | 1.746885025  | 1.340185310  | H                                                                 | -1.359556043 | -1.455271434 | 0.261057989  |
| H                                                                | 4.392744587  | 0.626294152  | 1.442382116  | H                                                                 | -0.471113603 | -1.645462745 | 1.517767570  |
| O                                                                | 4.397029909  | -1.265604629 | 1.553157639  | O                                                                 | -5.021710574 | 0.545009410  | 1.383156466  |
| H                                                                | 4.428659581  | -1.467819484 | 0.580770169  | H                                                                 | -5.836474286 | 0.928446408  | 1.729841003  |
| H                                                                | 5.084604757  | -1.807425815 | 1.959099471  | H                                                                 | -5.055641024 | 0.675000086  | 0.398384526  |
| O                                                                | 4.266221805  | -1.542508640 | -1.122312498 | O                                                                 | -4.834670280 | 0.688094226  | -1.298348453 |
| H                                                                | 4.392360706  | -0.627535971 | -1.443201300 | H                                                                 | -3.973810508 | 1.097129870  | -1.499114019 |
| H                                                                | 3.340023080  | -1.747845975 | -1.340891636 | H                                                                 | -4.722500660 | -0.247739584 | -1.558587201 |
|                                                                  |              |              |              | O                                                                 | -4.251346726 | -2.081166131 | -1.534337051 |
|                                                                  |              |              |              | H                                                                 | -4.755844096 | -2.806589526 | -1.922040513 |
|                                                                  |              |              |              | H                                                                 | -4.274004172 | -2.227251022 | -0.551834381 |
|                                                                  |              |              |              | O                                                                 | -4.176275321 | -2.156827938 | 1.157658866  |
|                                                                  |              |              |              | H                                                                 | -4.547074798 | -1.287387571 | 1.407916923  |
|                                                                  |              |              |              | H                                                                 | -3.239622345 | -2.100251838 | 1.417455526  |

| <b>W<sub>18:2</sub></b><br><b>E(MP2/aTZ) = -1374.2278407 a.u.</b> |              |              |              | <b>W<sub>20:1</sub></b><br><b>E(MP2/aTZ) = -1526.928884 a.u.</b> |              |              |              |
|-------------------------------------------------------------------|--------------|--------------|--------------|------------------------------------------------------------------|--------------|--------------|--------------|
| O                                                                 | 2.985837276  | 2.762207709  | -0.219738379 | O                                                                | -4.145836579 | -0.958124891 | -1.352371619 |
| H                                                                 | 2.984688995  | 2.183410371  | -1.027760176 | H                                                                | -3.693473488 | -0.114374057 | -1.523016805 |
| H                                                                 | 3.666656919  | 3.426695831  | -0.382144460 | H                                                                | -4.362230551 | -0.931315491 | -0.398091202 |
| O                                                                 | 2.775488586  | 1.479163810  | 2.277659618  | O                                                                | -4.327106086 | -1.119553115 | 1.461446503  |
| H                                                                 | 1.850293685  | 1.689940890  | 2.489497251  | H                                                                | -5.093087338 | -1.342362585 | 2.004460722  |
| H                                                                 | 2.929970122  | 1.908215410  | 1.410824775  | H                                                                | -3.725310273 | -1.907241066 | 1.515295326  |
| O                                                                 | 2.992995794  | -1.186494321 | 2.494395078  | O                                                                | -2.687056045 | -3.248871149 | 1.300090757  |
| H                                                                 | 2.990333401  | -0.197260720 | 2.397445380  | H                                                                | -2.671475677 | -3.430200829 | 0.340020032  |
| H                                                                 | 3.675330730  | -1.377329216 | 3.149718919  | H                                                                | -1.748044661 | -3.170875533 | 1.544449318  |
| O                                                                 | 2.779433655  | -2.709239162 | 0.135751577  | O                                                                | -2.731428880 | -3.238825785 | -1.560078521 |
| H                                                                 | 2.934866690  | -2.172533794 | 0.940159120  | H                                                                | -3.257972296 | -2.396924455 | -1.584913875 |
| H                                                                 | 1.854923042  | -2.999696149 | 0.214600311  | H                                                                | -3.195245857 | -3.847656794 | -2.148166259 |
| O                                                                 | 2.989612441  | -1.563685417 | -2.281434486 | O                                                                | 0.054327689  | -2.614519478 | -1.393153179 |
| H                                                                 | 3.671263761  | -2.034816163 | -2.776217463 | H                                                                | 0.047516691  | -1.637530272 | -1.532259090 |
| H                                                                 | 2.989664294  | -1.974648849 | -1.376364284 | H                                                                | -0.840362812 | -2.911321474 | -1.644383831 |
| O                                                                 | 2.772144975  | 1.240167743  | -2.419167288 | O                                                                | 0.140116960  | -2.680414240 | 1.352771375  |
| H                                                                 | 2.929132987  | 0.275374379  | -2.357129471 | H                                                                | 1.044255071  | -2.932951935 | 1.618245855  |
| H                                                                 | 1.846807325  | 1.315818178  | -2.707815645 | H                                                                | 0.153602595  | -2.732406520 | 0.366462764  |
| O                                                                 | 0.114570841  | 2.698067487  | -0.053838149 | O                                                                | -0.023262462 | 0.028666552  | 1.401987166  |
| H                                                                 | 0.061647989  | 2.180483168  | 0.787201736  | H                                                                | -0.936748624 | 0.362180022  | 1.559953194  |
| H                                                                 | 1.034652419  | 3.015777190  | -0.087756666 | H                                                                | -0.027730102 | -0.947928508 | 1.546540119  |
| O                                                                 | -0.118159735 | 1.394708079  | 2.308038110  | O                                                                | 0.067360465  | 0.107862192  | -1.335652001 |
| H                                                                 | -1.038736615 | 1.580492468  | 2.566293732  | H                                                                | 0.062806359  | 0.102860575  | -0.346571710 |
| H                                                                 | -0.062581368 | 0.407718561  | 2.280432218  | H                                                                | 0.914909538  | 0.567463485  | -1.543785882 |
| O                                                                 | 0.121669889  | -1.301783398 | 2.361611934  | O                                                                | -2.377641664 | 1.338172760  | -1.380114501 |
| H                                                                 | 0.067277090  | -1.772257740 | 1.493445078  | H                                                                | -2.246016947 | 2.284376913  | -1.571573755 |
| H                                                                 | 1.042550920  | -1.429990906 | 2.651748488  | H                                                                | -1.489443907 | 0.937926610  | -1.529660448 |
| O                                                                 | -0.114553889 | -2.698083124 | 0.053845222  | O                                                                | -2.524279017 | 1.131687031  | 1.351011566  |
| H                                                                 | -1.034651552 | -3.015777337 | 0.087774657  | H                                                                | -3.238005780 | 0.508076538  | 1.574960000  |
| H                                                                 | -0.061639590 | -2.180477427 | -0.787179416 | H                                                                | -2.555859726 | 1.196514954  | 0.365394997  |
| O                                                                 | 0.118163389  | -1.394705082 | -2.308028217 | O                                                                | -1.461436523 | 3.855779636  | 1.392905747  |
| H                                                                 | 0.062595979  | -0.407734700 | -2.280416529 | H                                                                | -1.915563367 | 3.021713772  | 1.599802953  |
| H                                                                 | 1.038744884  | -1.580504040 | -2.566281949 | H                                                                | -1.637623073 | 4.000537113  | 0.440763686  |
| O                                                                 | -0.121657464 | 1.301771602  | -2.361596945 | O                                                                | -1.505171238 | 4.085560408  | -1.419845825 |
| H                                                                 | -0.067274776 | 1.772256274  | -1.493426810 | H                                                                | -0.516634130 | 4.043046486  | -1.503149202 |
| H                                                                 | -1.042534564 | 1.429997639  | -2.651734869 | H                                                                | -1.773724726 | 4.840398588  | -1.957910305 |
| O                                                                 | -2.779421244 | 2.709267528  | -0.135736418 | O                                                                | 1.186217013  | 3.999986194  | -1.349776813 |
| H                                                                 | -2.934867458 | 2.172517749  | -0.940157305 | H                                                                | 1.684001170  | 3.200667639  | -1.595378923 |
| H                                                                 | -1.854911548 | 2.999699557  | -0.214576902 | H                                                                | 1.368832360  | 4.116922574  | -0.397196841 |
| O                                                                 | -2.989597221 | 1.563669435  | 2.281442422  | O                                                                | 1.217347343  | 4.116121598  | 1.509930537  |
| H                                                                 | -3.671268384 | 2.034809837  | 2.776237072  | H                                                                | 0.231641174  | 4.016834094  | 1.571070846  |
| H                                                                 | -2.989653510 | 1.974626749  | 1.376389097  | H                                                                | 1.434077870  | 4.868029416  | 2.074837130  |
| O                                                                 | -2.772142610 | -1.240177031 | 2.419170943  | O                                                                | 2.281656412  | 1.480172247  | 1.337415347  |
| H                                                                 | -2.929136092 | -0.275384304 | 2.357121574  | H                                                                | 2.059108672  | 2.398516805  | 1.579965417  |
| H                                                                 | -1.846787155 | -1.315835975 | 2.707824298  | H                                                                | 1.451755302  | 0.978262372  | 1.506406266  |
| O                                                                 | -2.985838084 | -2.762207287 | 0.219710613  | O                                                                | 2.473776028  | 1.402315797  | -1.388679237 |
| H                                                                 | -3.666672061 | -3.426685514 | 0.382117148  | H                                                                | 3.188996835  | 0.787628702  | -1.629694299 |
| H                                                                 | -2.984681481 | -2.183396185 | 1.027755708  | H                                                                | 2.500196632  | 1.433285311  | -0.400711777 |
| O                                                                 | -2.775474893 | -1.479139074 | -2.277651268 | O                                                                | 4.328874706  | -0.834785368 | -1.505056761 |
| H                                                                 | -1.850285337 | -1.689934544 | -2.489509043 | H                                                                | 3.790071288  | -1.667717394 | -1.540062054 |
| H                                                                 | -2.929966758 | -1.908203871 | -1.410850609 | H                                                                | 5.106040046  | -1.010428314 | -2.049720557 |
| O                                                                 | -2.992977751 | 1.186513313  | -2.494382784 | O                                                                | 4.198053034  | -0.687798320 | 1.310345179  |
| H                                                                 | -3.675308624 | 1.377351860  | -3.149711554 | H                                                                | 4.388842601  | -0.651006267 | 0.350619082  |
| H                                                                 | -2.990326368 | 0.197285044  | -2.397451547 | H                                                                | 3.698393931  | 0.127243042  | 1.488029658  |
|                                                                   |              |              |              | O                                                                | 2.966272966  | -3.067936425 | 1.570700414  |
|                                                                   |              |              |              | H                                                                | 3.496062453  | -3.636282769 | 2.143308609  |
|                                                                   |              |              |              | H                                                                | 3.422301112  | -2.185687750 | 1.579807284  |
|                                                                   |              |              |              | O                                                                | 2.879738298  | -3.100711633 | -1.290742851 |
|                                                                   |              |              |              | H                                                                | 1.929625093  | -3.076463930 | -1.503127727 |
|                                                                   |              |              |              | H                                                                | 2.906892077  | -3.273090424 | -0.329572141 |

| <b>W<sub>20:2</sub></b><br><b>E(MP2/aTZ) = -1526.924889 a.u.</b> |              |              |              | <b>W<sub>20:3</sub></b><br><b>E(MP2/aTZ) = -1526.925493 a.u.</b> |              |              |              |
|------------------------------------------------------------------|--------------|--------------|--------------|------------------------------------------------------------------|--------------|--------------|--------------|
| O                                                                | -4.273911407 | 1.294195857  | 1.987155807  | O                                                                | 5.397233678  | 0.434315834  | 1.409767433  |
| H                                                                | -4.416575684 | 1.700130236  | 1.108870884  | H                                                                | 5.616103947  | 0.553305687  | 0.465648376  |
| H                                                                | -3.354027193 | 1.520802905  | 2.201693258  | H                                                                | 4.573511301  | 0.945323750  | 1.526950891  |
| O                                                                | -4.455400452 | 2.307713660  | -0.661793941 | O                                                                | 5.604936694  | 0.326253780  | -1.453007970 |
| H                                                                | -4.509606640 | 1.510585390  | -1.254501046 | H                                                                | 5.334320246  | -0.630844943 | -1.471286048 |
| H                                                                | -5.137021203 | 2.913374564  | -0.977688961 | H                                                                | 6.348126290  | 0.404289843  | -2.063594452 |
| O                                                                | -4.345731361 | 0.122974371  | -2.208345790 | O                                                                | 4.623811986  | -2.162924081 | -1.258395165 |
| H                                                                | -4.488214290 | -0.717139243 | -1.724538480 | H                                                                | 3.671215759  | -2.103439943 | -1.451531027 |
| H                                                                | -3.421910457 | 0.068214543  | -2.508846108 | H                                                                | 4.661763624  | -2.351520465 | -0.299060126 |
| O                                                                | -4.503815847 | -2.242122958 | -0.684581873 | O                                                                | 4.693155820  | -2.151531599 | -1.577815304 |
| H                                                                | -4.525138366 | -1.973523737 | 0.276539561  | H                                                                | 5.036597859  | -1.218624481 | 1.611785196  |
| H                                                                | -5.191019234 | -2.912492656 | -0.783120459 | H                                                                | 5.235004277  | -2.655190406 | 2.197343984  |
| O                                                                | -4.320592071 | -1.459532677 | 1.850253977  | O                                                                | 2.740869316  | 1.429610158  | 1.263235045  |
| H                                                                | -3.409685273 | -1.644839415 | 2.131438629  | H                                                                | 2.093129838  | 2.120836575  | 1.499366117  |
| H                                                                | -4.386302870 | -0.478213641 | 1.929359954  | H                                                                | 2.785380307  | 1.453447857  | 0.276509423  |
| O                                                                | -1.336459101 | 1.398350747  | 1.915046343  | O                                                                | 2.926757147  | 1.215088363  | -1.454978001 |
| H                                                                | -0.495181988 | 1.742839844  | 2.250073225  | H                                                                | 3.875063329  | 1.078255706  | -1.646236970 |
| H                                                                | -1.382882849 | 1.710393441  | 0.974011686  | H                                                                | 2.524129255  | 0.321113302  | -1.552957036 |
| O                                                                | -1.597179836 | 2.211372341  | -0.643459102 | O                                                                | 1.861918232  | -1.320613841 | -1.320525750 |
| H                                                                | -2.524966433 | 2.505472859  | -0.713202476 | H                                                                | 0.949719358  | -1.468181147 | -1.624155647 |
| H                                                                | -1.553027267 | 1.421939474  | -1.234557987 | H                                                                | 1.806081963  | -1.351235305 | -0.335325481 |
| O                                                                | -1.461124972 | -0.010737200 | -2.245055075 | O                                                                | 1.977337272  | -1.200632959 | 1.421382846  |
| H                                                                | -1.467821766 | -0.819290852 | -1.672203763 | H                                                                | 2.779030965  | -1.689756630 | 1.680687008  |
| H                                                                | -0.603324128 | -0.032163316 | -2.698058756 | H                                                                | 2.234139401  | -0.251378252 | 1.497737564  |
| O                                                                | -1.641545995 | -2.188275120 | -0.647889180 | O                                                                | 0.598818618  | 3.261187225  | 1.466793283  |
| H                                                                | -1.570510404 | -1.899584282 | 0.292708531  | H                                                                | 0.479072149  | 4.051827597  | 2.007265323  |
| H                                                                | -2.573526148 | -2.459528599 | -0.747039106 | H                                                                | -0.228055279 | 2.741412283  | 1.568628539  |
| O                                                                | -1.382997170 | -1.341131239 | 1.954564191  | O                                                                | 0.736653616  | 3.039548427  | -1.505043873 |
| H                                                                | -0.518612393 | -1.617174822 | 2.295770339  | H                                                                | 0.775394025  | 3.303596286  | -0.570276955 |
| H                                                                | -1.345997796 | -0.354167618 | 1.968792787  | H                                                                | 1.562541481  | 2.540131785  | -1.644363440 |
| O                                                                | 1.637749545  | 1.332098618  | 1.940863716  | O                                                                | -1.546882119 | 1.505480979  | 1.296221792  |
| H                                                                | 2.580665796  | 1.490476998  | 2.121245056  | H                                                                | -2.489244082 | 1.626046494  | 1.548816293  |
| H                                                                | 1.565294183  | 0.347357753  | 1.936894535  | H                                                                | -1.581622129 | 1.513593325  | 0.306577650  |
| O                                                                | 1.326059268  | 2.202277671  | -0.601648690 | O                                                                | -1.560699416 | 1.438541097  | -1.432590002 |
| H                                                                | 1.374743191  | 1.891681847  | 0.338862844  | H                                                                | -0.757433935 | 1.967029264  | -1.629680371 |
| H                                                                | 0.449868624  | 2.611633868  | -0.685761806 | H                                                                | -1.332059416 | 0.491536324  | -1.593159319 |
| O                                                                | 1.443618426  | 0.084547338  | -2.342711592 | O                                                                | -1.039390734 | -1.242303233 | -1.432503603 |
| H                                                                | 1.402384491  | 0.858068964  | -1.731495055 | H                                                                | -0.998271088 | -1.290132545 | -0.448820628 |
| H                                                                | 2.361159097  | 0.079259381  | -2.670610637 | H                                                                | -1.814926858 | -1.789714663 | -1.662610796 |
| O                                                                | 1.273861219  | -2.136623179 | -0.795847482 | O                                                                | -0.893734195 | -1.153692151 | 1.327434888  |
| H                                                                | 0.391392236  | -2.524606439 | -0.910763975 | H                                                                | -1.086292492 | -0.196270315 | 1.472842927  |
| H                                                                | 1.275922156  | -1.333171364 | -1.374834044 | H                                                                | 0.029886931  | -1.284148321 | 1.603923471  |
| O                                                                | 1.590869716  | -1.421853575 | 1.845941893  | O                                                                | -4.332954159 | 1.721748866  | 1.531477524  |
| H                                                                | 2.520924327  | -1.635418735 | 2.031820920  | H                                                                | -4.723229925 | 0.834555197  | 1.648268590  |
| H                                                                | 1.467660233  | -1.683612550 | 0.903352853  | H                                                                | -4.500523449 | 1.926257123  | 0.595902202  |
| O                                                                | 4.561929527  | 1.376012976  | 1.731530773  | O                                                                | -4.292689639 | 1.891089345  | -1.424486882 |
| H                                                                | 4.481994716  | 1.673549126  | 0.782035922  | H                                                                | -3.322841533 | 1.847133088  | -1.562911610 |
| H                                                                | 5.230902394  | 1.951646122  | 2.122650038  | H                                                                | -4.613929716 | 2.549135631  | -2.053355133 |
| O                                                                | 4.186824627  | 2.132650565  | -0.794036964 | O                                                                | -5.351057331 | -0.954934556 | 1.548524183  |
| H                                                                | 3.251375246  | 2.389049421  | -0.882427957 | H                                                                | -4.603703549 | -1.611447567 | 1.556586166  |
| H                                                                | 4.305448851  | 1.406897395  | -1.441114161 | H                                                                | -6.003802520 | -1.292743271 | 2.173798536  |
| O                                                                | 4.304702297  | -0.086191372 | -2.514597061 | O                                                                | -5.351768910 | -0.760229614 | -1.270647053 |
| H                                                                | 4.319273991  | -0.898444713 | -1.940302948 | H                                                                | -5.543417874 | -0.799386561 | -0.312524636 |
| H                                                                | 4.958241971  | -0.241667824 | -3.207248815 | H                                                                | -5.034974278 | 0.151767597  | -1.414460253 |
| O                                                                | 4.133027300  | -2.203143259 | -0.879946422 | O                                                                | -3.494305042 | -2.663417499 | -1.568406126 |
| H                                                                | 4.331776262  | -1.967117034 | 0.047986393  | H                                                                | -4.209904040 | -1.971922620 | -1.558302401 |
| H                                                                | 3.193167447  | -2.459264561 | -0.867606747 | H                                                                | -3.805540213 | -3.354485322 | -2.165630204 |
| O                                                                | 4.526379795  | -1.375087859 | 1.806762926  | O                                                                | -3.306459595 | -2.665273360 | 1.286777273  |
| H                                                                | 4.643406342  | -0.397043391 | 1.841163115  | H                                                                | -2.440196245 | -2.246114746 | 1.446450377  |
| H                                                                | 5.236898750  | -1.739310584 | 2.349017994  | H                                                                | -3.310513743 | -2.850675881 | 0.327597746  |

| <b>(NH<sub>3</sub>)<sub>8:1</sub></b><br><b>E(MP2/aTZ) = -451.7526727 a.u.</b> |              |              |              | <b>(NH<sub>3</sub>)<sub>8:2</sub></b><br><b>E(MP2/aTZ) = -451.7523221 a.u.</b> |              |              |              |
|--------------------------------------------------------------------------------|--------------|--------------|--------------|--------------------------------------------------------------------------------|--------------|--------------|--------------|
| N                                                                              | -2.109504000 | 1.726363000  | 1.261954000  | N                                                                              | 1.148330000  | -2.084689000 | 0.010668000  |
| H                                                                              | -3.067935000 | 1.462392000  | 1.466698000  | H                                                                              | 1.283427000  | -1.568777000 | -0.856539000 |
| H                                                                              | -2.040322000 | 2.717953000  | 1.467270000  | H                                                                              | 1.520234000  | -3.017432000 | -0.134688000 |
| H                                                                              | -1.966549000 | 1.609821000  | 0.253791000  | H                                                                              | 0.144280000  | -2.184349000 | 0.144848000  |
| N                                                                              | 1.125441000  | 1.375173000  | 1.703012000  | N                                                                              | 2.140591000  | -0.095341000 | 2.187823000  |
| H                                                                              | 1.494154000  | 1.825752000  | 2.533881000  | H                                                                              | 2.211711000  | -0.521316000 | 3.105980000  |
| H                                                                              | 1.376005000  | 0.390004000  | 1.761470000  | H                                                                              | 3.059210000  | 0.278552000  | 1.973037000  |
| H                                                                              | 0.110179000  | 1.426298000  | 1.761222000  | H                                                                              | 1.940404000  | -0.839790000 | 1.512882000  |
| N                                                                              | 2.108586000  | -1.726831000 | 1.262704000  | N                                                                              | 1.148337000  | 2.084685000  | -0.010671000 |
| H                                                                              | 2.039121000  | -2.718481000 | 1.467634000  | H                                                                              | 1.520246000  | 3.017426000  | 0.134685000  |
| H                                                                              | 3.066912000  | -1.463068000 | 1.468204000  | H                                                                              | 0.144288000  | 2.184350000  | -0.144849000 |
| H                                                                              | 1.966354000  | -1.609927000 | 0.254480000  | H                                                                              | 1.283434000  | 1.568773000  | 0.856537000  |
| N                                                                              | -1.126643000 | -1.375777000 | 1.701985000  | N                                                                              | 2.140588000  | 0.095336000  | -2.187825000 |
| H                                                                              | -1.377238000 | -0.390629000 | 1.760664000  | H                                                                              | 1.940403000  | 0.839786000  | -1.512884000 |
| H                                                                              | -1.495891000 | -1.826680000 | 2.532440000  | H                                                                              | 3.059207000  | -0.278559000 | -1.973040000 |
| H                                                                              | -0.111418000 | -1.426924000 | 1.760821000  | H                                                                              | 2.211708000  | 0.521311000  | -3.105982000 |
| N                                                                              | -1.726176000 | -2.108774000 | -1.263200000 | N                                                                              | -1.148335000 | -0.010668000 | -2.084684000 |
| H                                                                              | -2.717715000 | -2.039302000 | -1.468666000 | H                                                                              | -0.144287000 | -0.144849000 | -2.184350000 |
| H                                                                              | -1.462345000 | -3.067145000 | -1.468405000 | H                                                                              | -1.283428000 | 0.856536000  | -1.568764000 |
| H                                                                              | -1.609804000 | -1.966380000 | -0.254937000 | H                                                                              | -1.520244000 | 0.134698000  | -3.017424000 |
| N                                                                              | 1.376054000  | -1.125773000 | -1.702266000 | N                                                                              | -2.140586000 | 2.187831000  | 0.095339000  |
| H                                                                              | 1.427226000  | -0.110523000 | -1.760647000 | H                                                                              | -3.059207000 | 1.973050000  | -0.278554000 |
| H                                                                              | 1.827031000  | -1.494655000 | -2.532845000 | H                                                                              | -1.940402000 | 1.512889000  | 0.839789000  |
| H                                                                              | 0.390907000  | -1.376324000 | -1.761153000 | H                                                                              | -2.211700000 | 3.105988000  | 0.521314000  |
| N                                                                              | 1.727100000  | 2.109242000  | -1.261454000 | N                                                                              | -1.148332000 | 0.010671000  | 2.084686000  |
| H                                                                              | 2.718791000  | 2.039848000  | -1.466211000 | H                                                                              | -1.520238000 | -0.134685000 | 3.017429000  |
| H                                                                              | 1.609979000  | 1.966501000  | -0.253327000 | H                                                                              | -0.144283000 | 0.144847000  | 2.184347000  |
| H                                                                              | 1.463409000  | 3.067680000  | -1.466528000 | H                                                                              | -1.283432000 | -0.856536000 | 1.568774000  |
| N                                                                              | -1.374845000 | 1.126394000  | -1.702733000 | N                                                                              | -2.140593000 | -2.187825000 | -0.095338000 |
| H                                                                              | -0.389667000 | 1.376983000  | -1.760941000 | H                                                                              | -1.940408000 | -1.512885000 | -0.839788000 |
| H                                                                              | -1.825319000 | 1.495521000  | -2.533475000 | H                                                                              | -3.059212000 | -1.973041000 | 0.278557000  |
| H                                                                              | -1.425962000 | 0.111162000  | -1.761451000 | H                                                                              | -2.211711000 | -3.105983000 | -0.521312000 |

| <b>(HF)<sub>3</sub>(H<sub>2</sub>O)<sub>5</sub></b><br><b>E(MP2/aTZ) = -682.7973725 a.u.</b> |              |              |              | <b>(HF)<sub>4</sub>(H<sub>2</sub>O)<sub>4</sub></b><br><b>E(MP2/aTZ) = -706.8099142 a.u.</b> |              |              |              |
|----------------------------------------------------------------------------------------------|--------------|--------------|--------------|----------------------------------------------------------------------------------------------|--------------|--------------|--------------|
| O                                                                                            | 1.841245000  | -0.002124000 | 1.510673000  | O                                                                                            | -0.218971000 | -1.948088000 | 1.195587000  |
| H                                                                                            | 1.267501000  | 0.763727000  | 1.686548000  | H                                                                                            | 0.606289000  | -1.497623000 | 1.455741000  |
| H                                                                                            | 1.266548000  | -0.767562000 | 1.685252000  | H                                                                                            | -0.923668000 | -1.325873000 | 1.456155000  |
| O                                                                                            | 2.147804000  | -0.000242000 | -1.140203000 | O                                                                                            | 1.948088000  | -0.218972000 | -1.195591000 |
| H                                                                                            | 2.196807000  | -0.001008000 | -0.145793000 | H                                                                                            | 1.325874000  | -0.923670000 | -1.456158000 |
| H                                                                                            | 3.058590000  | -0.000494000 | -1.460611000 | H                                                                                            | 1.497623000  | 0.606287000  | -1.455744000 |
| O                                                                                            | 0.122117000  | -1.919951000 | -1.185095000 | O                                                                                            | -1.948091000 | 0.218973000  | -1.195584000 |
| H                                                                                            | 0.905412000  | -1.352310000 | -1.344874000 | H                                                                                            | -1.497622000 | -0.606286000 | -1.455736000 |
| H                                                                                            | -0.628813000 | -1.398292000 | -1.523877000 | H                                                                                            | -1.325879000 | 0.923673000  | -1.456154000 |
| O                                                                                            | -2.074656000 | 0.000366000  | 0.985786000  | O                                                                                            | 0.218975000  | 1.948090000  | 1.195587000  |
| H                                                                                            | -1.557520000 | -0.770521000 | 1.288251000  | H                                                                                            | -0.606283000 | 1.497622000  | 1.455740000  |
| H                                                                                            | -1.556688000 | 0.770241000  | 1.289410000  | H                                                                                            | 0.923675000  | 1.325878000  | 1.456156000  |
| O                                                                                            | 0.124146000  | 1.921672000  | -1.182168000 | F                                                                                            | -0.224940000 | -2.001337000 | -1.265766000 |
| H                                                                                            | 0.906823000  | 1.353430000  | -1.342830000 | H                                                                                            | -0.230871000 | -2.050738000 | -0.271184000 |
| H                                                                                            | -0.627349000 | 1.401362000  | -1.521766000 | F                                                                                            | 2.001342000  | -0.224937000 | 1.265763000  |
| F                                                                                            | -0.175475000 | -2.032110000 | 1.258180000  | H                                                                                            | 2.050740000  | -0.230872000 | 0.271182000  |
| H                                                                                            | -0.048615000 | -2.053194000 | 0.271601000  | F                                                                                            | -2.001335000 | 0.224938000  | 1.265769000  |
| F                                                                                            | -1.919318000 | 0.002124000  | -1.468891000 | H                                                                                            | -2.050738000 | 0.230875000  | 0.271187000  |
| H                                                                                            | -2.052359000 | 0.001464000  | -0.480562000 | F                                                                                            | 0.224936000  | 2.001339000  | -1.265767000 |
| F                                                                                            | -0.173399000 | 2.030432000  | 1.261281000  | H                                                                                            | 0.230875000  | 2.050739000  | 0.271186000  |
| H                                                                                            | -0.046458000 | 2.052874000  | 0.274749000  |                                                                                              |              |              |              |

**(HF)<sub>4</sub>(H<sub>2</sub>O)<sub>8</sub>**

**E(MP2/aTZ) = -1012.201323 a.u.**

|   |              |              |              |
|---|--------------|--------------|--------------|
| O | 2.794865000  | 1.773670000  | -0.429186000 |
| H | 2.949750000  | 1.437444000  | 0.473393000  |
| H | 1.880975000  | 2.119535000  | -0.405634000 |
| F | 2.848815000  | -0.200709000 | -1.913872000 |
| H | 2.859279000  | 0.623045000  | -1.361616000 |
| O | 2.794903000  | -1.773668000 | 0.429160000  |
| H | 1.881015000  | -2.119534000 | 0.405624000  |
| H | 2.949780000  | -1.437433000 | -0.473418000 |
| F | 2.848835000  | 0.200712000  | 1.913844000  |
| H | 2.859310000  | -0.623043000 | 1.361586000  |
| O | 0.004651000  | 1.907473000  | -0.364706000 |
| H | -0.868773000 | 2.332746000  | -0.394329000 |
| H | -0.062910000 | 1.161949000  | -1.007199000 |
| O | -0.004682000 | -0.364683000 | -1.907465000 |
| H | 0.868744000  | -0.394324000 | -2.332731000 |
| H | 0.062872000  | -1.007143000 | -1.161909000 |
| O | 0.004665000  | -1.907467000 | 0.364697000  |
| H | -0.062893000 | -1.161938000 | 1.007186000  |
| H | -0.868758000 | -2.332741000 | 0.394328000  |
| O | -0.004647000 | 0.364687000  | 1.907432000  |
| H | 0.868775000  | 0.394262000  | 2.332709000  |
| H | 0.062890000  | 1.007196000  | 1.161924000  |
| F | -2.848851000 | 1.913862000  | -0.200712000 |
| H | -2.859281000 | 1.361615000  | 0.623056000  |
| O | -2.794900000 | -0.429190000 | -1.773623000 |
| H | -2.949786000 | 0.473389000  | -1.437398000 |
| H | -1.881021000 | -0.405649000 | -2.119511000 |
| F | -2.848835000 | -1.913849000 | 0.200755000  |
| H | -2.859308000 | -1.361642000 | -0.623036000 |
| O | -2.794848000 | 0.429199000  | 1.773681000  |
| H | -2.949737000 | -0.473383000 | 1.437459000  |
| H | -1.880954000 | 0.405651000  | 2.119531000  |
